# Supplementary material for: Copper-catalyzed thioamination of maleimides with diethylphosphorodithioate and amines
Source: Royal Society of Chemistry journal article supplement (doi:10.1039/d1qo00346a), 2021-01-01

# Supporting Information

## Copper-Catalyzed Aminophosphorothiolation of Maleimides with Diethylphosphorodithioate and Amines

Yaling Xu,<sup>a</sup> Jieyi Gao,<sup>a</sup> Caihong Wang,<sup>a</sup> Yunfei Ma,<sup>a</sup> Jun Zhou,<sup>a</sup> Ge Wu,<sup>\*a,b</sup>

<sup>a</sup>School of Pharmaceutical Sciences, Wenzhou Medical University, Wenzhou 325035, People's Republic of China

<sup>b</sup>State Key Laboratory of Structural Chemistry, Fujian Institute of Research on the Structure of Matter, Chinese Academy of Sciences, Fuzhou, Fujian 350002, China

\*E-mail: wuge@wmu.edu.cn

### Table of Contents

|                                                                                                      |         |
|------------------------------------------------------------------------------------------------------|---------|
| (1) General considerations, experimental data.....                                                   | S2-S25  |
| (2) References for known compounds.....                                                              | S26     |
| (3) <sup>1</sup> H, <sup>13</sup> C, <sup>19</sup> F and <sup>31</sup> PNMR spectra of products..... | S27-S72 |

## General Information

Maleimides<sup>1</sup> and Cu(S<sub>2</sub>P(OEt)<sub>2</sub>)<sup>2</sup> were prepared according to the reported procedures. <sup>1</sup>H and <sup>13</sup>C spectra of known compounds were in accordance with those described in the literatures. All other reagents were purchased from TCI, Sigma-Aldrich, Alfa Aesar, Acros, and Meryer and used without further purification. <sup>1</sup>H NMR (500 MHz), <sup>13</sup>C NMR (125 MHz) and <sup>19</sup>F NMR (470 MHz) spectra were recorded in CDCl<sub>3</sub> and DMSO-D<sub>6</sub> solutions using a Bruker AVANCE 500 spectrometer. High-resolution mass spectra were recorded on an ESI-Q-TOF mass spectrometer. Analysis of crude reaction mixture was done on the Varian 4000 GC/MS and 1200 LC. All reactions were conducted using standard Schlenk techniques. Column chromatography was performed using EM silica gel 60 (300–400 m).

## Screening with different reaction conditions

**Table 1. Reaction Optimization<sup>a</sup>**

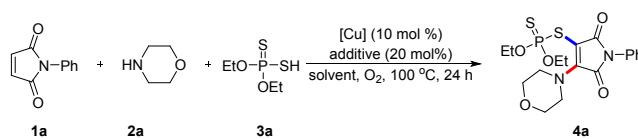

| entry           | [Cu]                 | additive                           | solvent            | Yield (%) <sup>b</sup> |
|-----------------|----------------------|------------------------------------|--------------------|------------------------|
| 1               | CuI                  |                                    | toluene            | 45                     |
| 2               | CuBr                 |                                    | toluene            | 55                     |
| 3               | CuCl                 |                                    | toluene            | 61                     |
| 4               | Cu(OAc) <sub>2</sub> |                                    | toluene            | 33                     |
| 5               | CuCl                 | FeCl <sub>3</sub>                  | toluene            | 74                     |
| 6               | CuCl                 | ZnCl <sub>2</sub>                  | toluene            | 51                     |
| 7               | CuCl                 | AlCl <sub>3</sub>                  | toluene            | 50                     |
| 8               | CuCl                 | BF <sub>3</sub> ·2H <sub>2</sub> O | toluene            | 25                     |
| 9               | CuCl                 | FePO <sub>4</sub>                  | toluene            | 66                     |
| 10              | CuCl                 | TsOH                               | toluene            | 49                     |
| 11              | CuCl                 | FeCl <sub>3</sub>                  | DMF                | 0                      |
| 12              | CuCl                 | FeCl <sub>3</sub>                  | CH <sub>3</sub> CN | 0                      |
| 13              | CuCl                 | FeCl <sub>3</sub>                  | DCE                | 70                     |
| 14 <sup>c</sup> | CuCl                 | FeCl <sub>3</sub>                  | toluene            | 0                      |
| 15 <sup>d</sup> | CuCl                 | FeCl <sub>3</sub>                  | toluene            | 65                     |
| 16              |                      | FeCl <sub>3</sub>                  | toluene            | 0                      |

<sup>a</sup>Reaction conditions unless specified otherwise: **1a** (0.2 mmol), **2a** (0.6 mmol), **3a** (0.6 mmol), catalyst (0.02 mmol), additive (0.04 mmol), solvent (2.0 mL), under O<sub>2</sub>, 100 °C, 24 h., <sup>b</sup>Isolated yield.

<sup>c</sup>Under N<sub>2</sub>. <sup>d</sup>Under air atmosphere.

## General Experimental Procedures

### General Procedure of Copper-Catalyzed Direct Aminophosphorothiolation of Maleimides with Diethylphosphorodithioate and Amines:

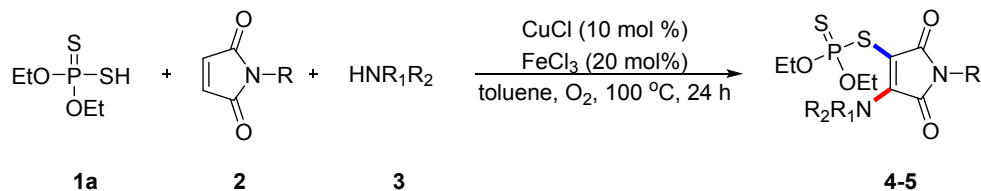

A 25 mL Schlenk tube equipped with a stir bar was charged with maleimide (0.2 mmol), secondary amines (0.6 mmol),  $\text{CuCl}$  (0.02 mmol)  $\text{FeCl}_3$  (0.04 mmol) and 2 mL toluene. Then, the addition of diethylphosphorodithioate (0.6 mmol) uses a pipette. The tube was fitted with a rubber septum, and then it was evacuated and refilled with dioxygen three times, then the septum was replaced by a Teflon screwcap under oxygen flow. The reaction mixture was stirred at 100 °C (aluminium block heating mantle) for 24 h. After cooling down, the reaction mixture was diluted with 10 mL of ethyl acetate, filtered through a pad of silica gel, followed by washing the pad of the silica gel with ethyl acetate (20 mL), concentrated under reduced pressure. The residue was then purified by flash chromatography on silica gel to provide the corresponding product.

#### 1mmol scale-up reaction:

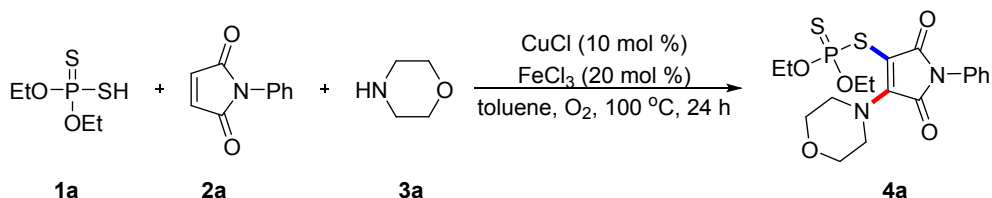

A 35 mL Schlenk tube equipped with a stir bar was charged with *N*-phenyl maleimide (1.0 mmol), morpholine (3.0 mmol),  $\text{CuCl}$  (0.1 mmol),  $\text{FeCl}_3$  (0.2 mmol) and 10 mL toluene. Then, the addition of diethylphosphorodithioate (3.0 mmol) uses a pipette. The tube was fitted with a rubber septum, and then it was evacuated and refilled with dioxygen three times, then the septum was replaced by a Teflon screwcap under oxygen flow. The reaction mixture was stirred at 100 °C (aluminium block heating mantle) for 24 h. After routine laboratory operations, the corresponding product was isolated in 61% yield.

## Mechanism investigation:

### (a) Radical scavenger

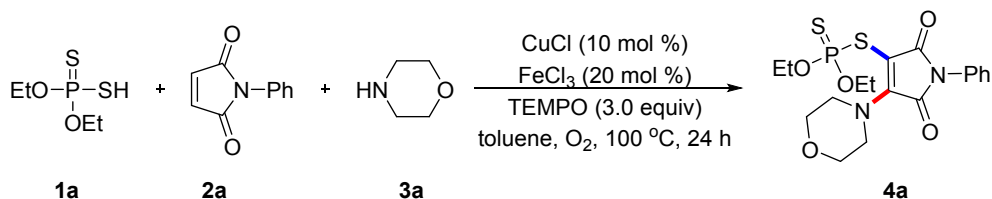

Three 25 mL Schlenk tubes equipped with a stir bar was charged with *N*-phenyl maleimide (0.2 mmol), morpholine (0.6 mmol), CuCl (0.02 mmol), FeCl<sub>3</sub> (0.04 mmol), TEMPO (0.6 mmol) and 2 mL toluene. Then, the addition of diethylphosphorodithioate (0.6 mmol) uses a pipette. The tube was fitted with a rubber septum, and then it was evacuated and refilled with dioxygen three times, then the septum was replaced by a Teflon screwcap under oxygen flow. The reaction mixture was stirred at 100 °C for 24 h. After cooling down, the reaction mixture was diluted with 10 mL of ethyl ether, filtered through a pad of silica gel, followed by washing the pad of the silica gel with the same solvent (20 mL), concentrated under reduced pressure. Each residue was then purified by flash chromatography on silica gel (petroleum ether : EtOAc = 9 : 1) to give **4a** product in 45% .

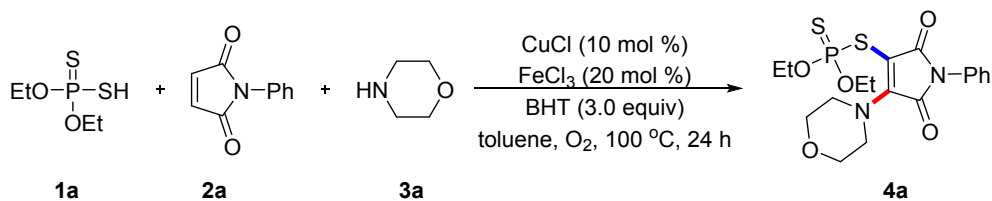

Three 25 mL Schlenk tubes equipped with a stir bar was charged with *N*-phenyl maleimide (0.2 mmol), morpholine (0.6 mmol), CuCl (0.02 mmol), FeCl<sub>3</sub> (0.04 mmol), BHT (0.6 mmol) and 2 mL toluene. Then, the addition of diethylphosphorodithioate (0.6 mmol) uses a pipette. The tube was fitted with a rubber septum, and then it was evacuated and refilled with dioxygen three times, then the septum was replaced by a Teflon screwcap under oxygen flow. The reaction mixture was stirred at 100 °C for 24 h. After cooling down, the reaction mixture was diluted with 10 mL of ethyl ether, filtered through a pad of silica gel, followed by washing the pad of the silica gel with the same solvent (20 mL), concentrated under reduced pressure. Each residue was then purified by flash chromatography on silica gel (petroleum ether : EtOAc = 9 : 1) to give **4a** product in 56% .

These results clearly indicated that the radical reaction process could be excluded in this multi-component reaction.

## (b) Probing key intermediate

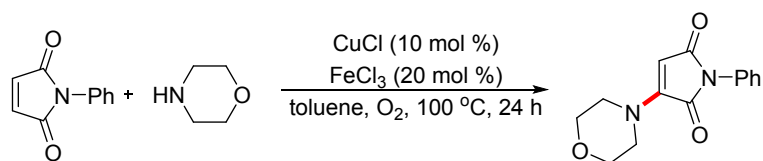

A 25 mL Schlenk tube equipped with a stir bar was charged with *N*-phenyl maleimide (0.2 mmol), morpholine (0.6 mmol), CuCl (0.02 mmol), FeCl<sub>3</sub> (0.04 mmol) and 2 mL toluene. The tube was fitted with a rubber septum, and then it was evacuated and refilled with dioxygen three times, then the septum was replaced by a Teflon screwcap under oxygen flow. The reaction mixture was stirred at 100 °C for 24 h. After cooling down, the reaction mixture was diluted with 10 mL of ethyl ether, filtered through a pad of silica gel, followed by washing the pad of the silica gel with the same solvent (20 mL), concentrated under reduced pressure. The residue was then purified by flash chromatography on silica gel (petroleum ether : EtOAc = 9 : 1) to give 3-morpholino-1-phenyl-1H-pyrrole-2,5-dione (isolated 83% yield).

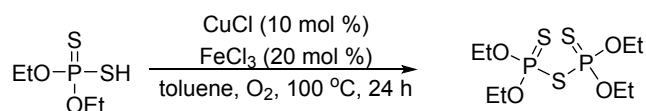

A 25 mL Schlenk tube equipped with a stir bar was charged with CuI (0.02 mmol), FeCl<sub>3</sub> (0.04 mmol) and 2 mL toluene, then, the addition of diethylphosphorodithioate (0.6 mmol) uses a pipette. The tube was fitted with a rubber septum, and then it was evacuated and refilled with dioxygen three times, then the septum was replaced by a Teflon screwcap under oxygen flow. The reaction mixture was stirred at 100 °C for 24 h. After cooling down, the reaction mixture was diluted with 10 mL of ethyl ether, filtered through a pad of silica gel, the oxidative homo-coupling bis(diethoxyphosphoryl)disulphide was not detected by TLC and GC-MS, in contrast, O,O,O,O-tetraethyl trithiopyrophosphate was isolated (95% yield).

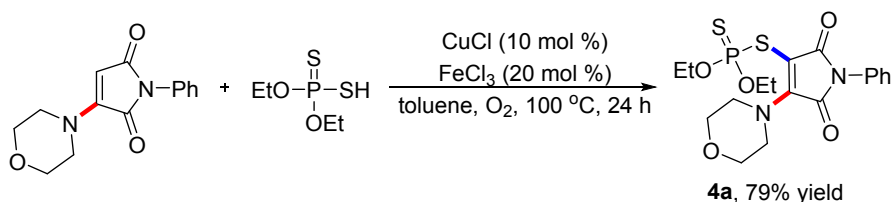

A 25 mL Schlenk tube equipped with a stir bar was charged with 3-morpholino-1-phenyl-1H-pyrrole-2,5-dione (0.2 mmol), CuCl (0.02 mmol), FeCl<sub>3</sub> (0.04 mmol) and 2 mL toluene, then, the

addition of diethylphosphorodithioate (0.6 mmol) uses a pipette. The tube was fitted with a rubber septum, and then it was evacuated and refilled with dioxygen three times, then the septum was replaced by a Teflon screwcap under oxygen flow. The reaction mixture was stirred at 100 °C for 24 h. After cooling down, the reaction mixture was diluted with 10 mL of ethyl ether, filtered through a pad of silica gel, the corresponding product **4a** was isolated in 79%.

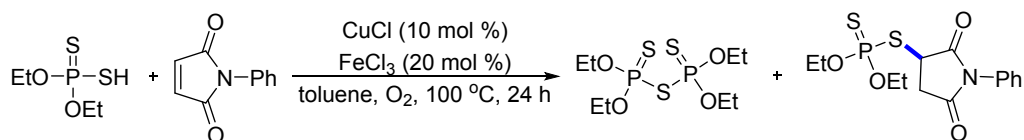

A 25 mL Schlenk tube equipped with a stir bar was charged with *N*-phenyl maleimide (0.2 mmol), CuCl (0.02 mmol), FeCl<sub>3</sub> (0.04 mmol) and 2 mL toluene, then, the addition of diethylphosphorodithioate (0.6 mmol) uses a pipette. The tube was fitted with a rubber septum, and then it was evacuated and refilled with dioxygen three times, then the septum was replaced by a Teflon screwcap under oxygen flow. The reaction mixture was stirred at 100 °C for 24 h. After cooling down, the reaction mixture was diluted with 10 mL of ethyl ether, there are two new points by judging by the TLC, however, these two new points were close, and could not be isolated by flash chromatography on silica gel. The unexpected byproduct O,O,O,O-tetraethyl trithiopyrophosphate and S-Michael-addition products were detected by GC-MS and HRMS.

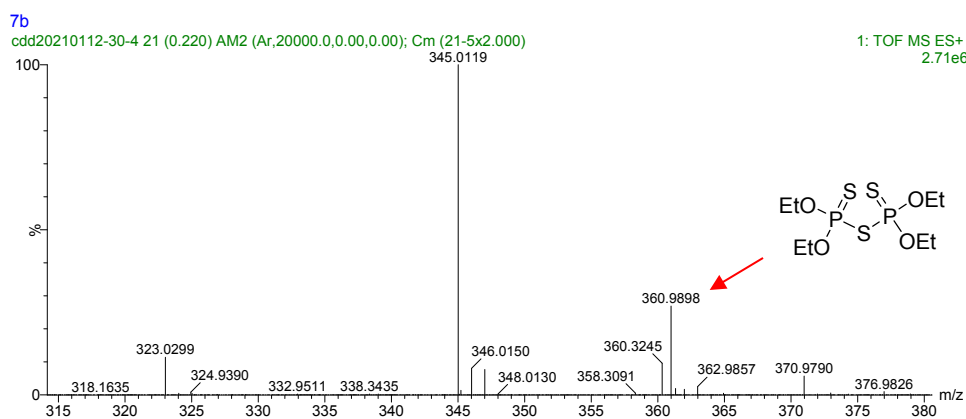

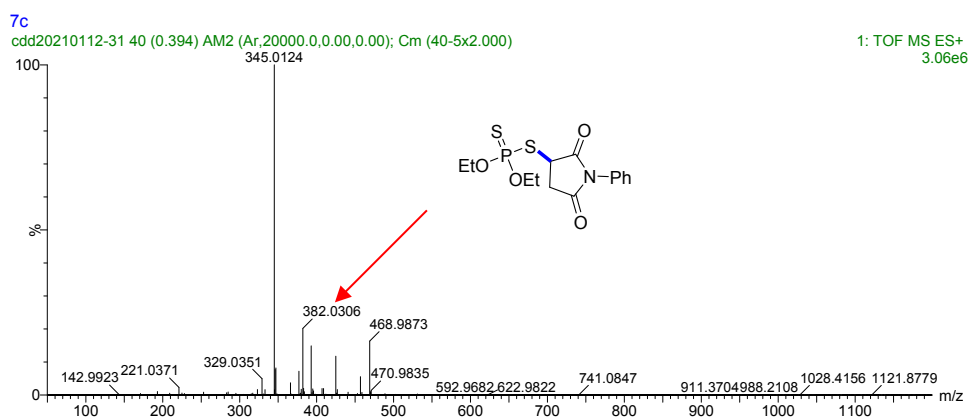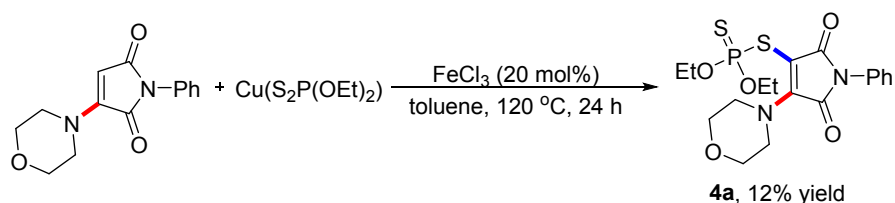

A 25 mL Schlenk tube equipped with a stir bar was charged with 3-morpholino-1-phenyl-1H-pyrrole-2,5-dione (0.2 mmol), FeCl<sub>3</sub> (0.04 mmol), Cu(S<sub>2</sub>P(OEt)<sub>2</sub>) (0.2 mmol) (light grey solid), and 2 mL toluene. The tube was fitted with a rubber septum, and then it was evacuated and refilled with dioxygen three times, then the septum was replaced by a Teflon screwcap under oxygen flow. The reaction mixture was stirred at 100 °C for 24 h. After cooling down, the reaction mixture was diluted with 10 mL of ethyl ether, filtered through a pad of silica gel, the corresponding product 4a was isolated in 12% yield.

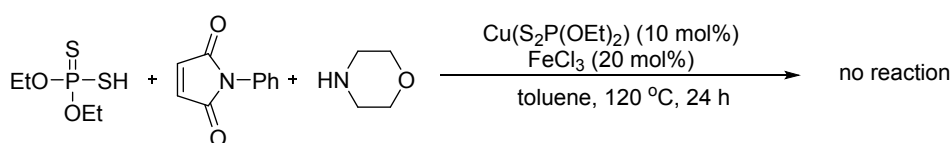

A 25 mL Schlenk tube equipped with a stir bar was charged with *N*-phenyl maleimide (0.2 mmol), morpholine (0.6 mmol), Cu(S<sub>2</sub>P(OEt)<sub>2</sub>) (0.02 mmol), FeCl<sub>3</sub> (0.04 mmol) and 2 mL toluene. Then, the addition of diethylphosphorodithioate (0.6 mmol) uses a pipette. The tube was fitted with a rubber septum, and then it was evacuated and refilled with dioxygen three times, then the septum was replaced by a Teflon screwcap under oxygen flow. The reaction mixture was stirred at 100 °C for 24 h. After cooling down, the reaction mixture was diluted with 10 mL of ethyl ether, filtered through a pad of silica gel, the corresponding product was not detected by TLC and GC-MS.



**(c) H/D exchange**

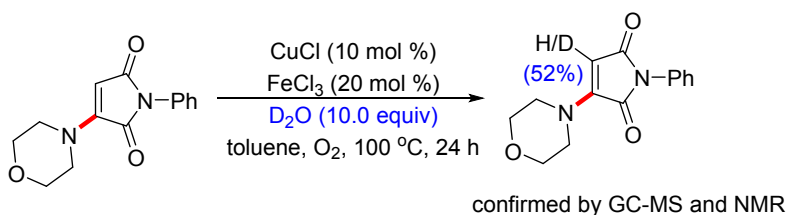

A 25 mL Schlenk tube equipped with a stir bar was charged with 3-morpholino-1-phenyl-1H-pyrrole-2,5-dione (0.2 mmol), D<sub>2</sub>O (2.0 mmol), CuCl (0.02 mmol), FeCl<sub>3</sub> (0.04 mmol) and 2 mL toluene. The tube was fitted with a rubber septum, and then it was evacuated and refilled with dioxygen three times, then the septum was replaced by a Teflon screwcap under oxygen flow. The reaction mixture was stirred at 100 °C. After stirring for 24 h, the reaction mixture was cooled to room temperature and the reaction was filtered through a pad of Celite and diluted with ethyl acetate (10 mL), deuterium-hydrogen exchange was observed in 3-morpholino-1-phenyl-1H-pyrrole-2,5-dione, which suggest the C-H activation was occurred under the current reaction condition.

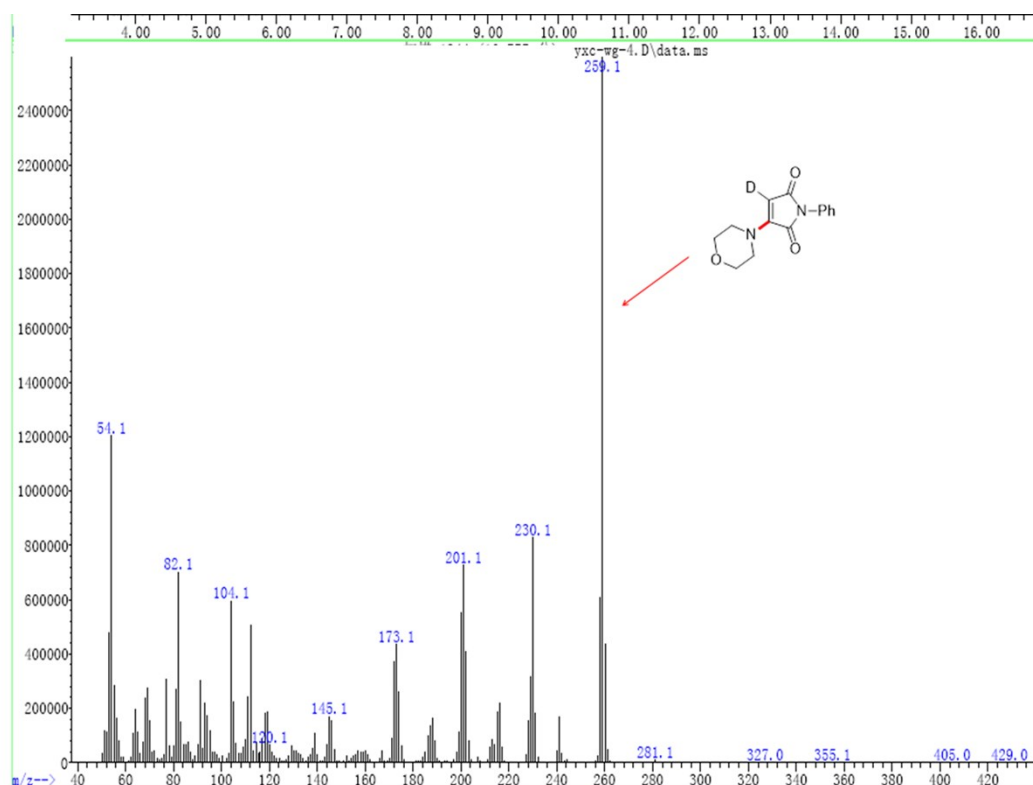

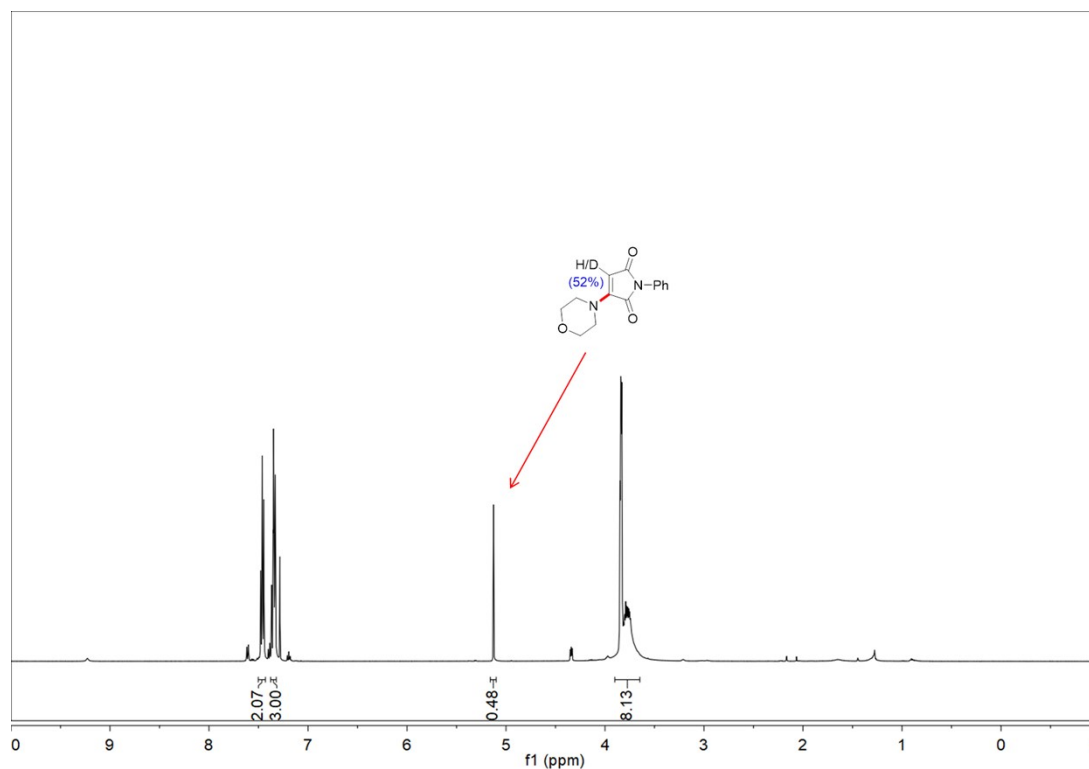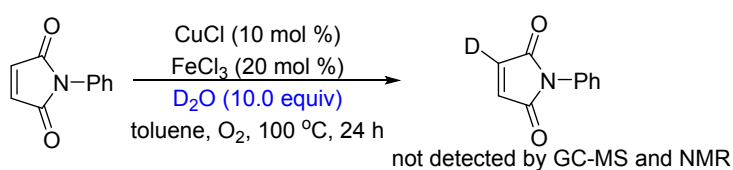

A 25 mL Schlenk tube equipped with a stir bar was charged with *N*-phenyl maleimide (0.2 mmol), D<sub>2</sub>O (2.0 mmol), CuCl (0.02 mmol), FeCl<sub>3</sub> (0.04 mmol) and 2 mL toluene. The tube was fitted with a rubber septum, and then it was evacuated and refilled with dioxygen three times, then the septum was replaced by a Teflon screwcap under oxygen flow. The reaction mixture was stirred at 100 °C. After stirring for 18 h, the reaction mixture was cooled to room temperature and the reaction was filtered through a pad of Celite and diluted with ethyl acetate (10 mL), the deuterated product was not detected by GC-MS and NMR.

## Characterization of Products in Details :

**O,O-diethyl**

**S-(4-morpholino-2,5-dioxo-1-phenyl-2,5-dihydro-1H-pyrrol-3-yl)**

**phosphorodithioate**

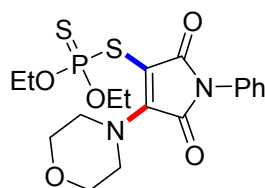

**4a**

Following the general procedure, using (petroleum ether : EtOAc = 9 : 1) as the eluant afforded a yellow solid (65.4 mg, 74% yield), Mp = 112-113°C. **<sup>1</sup>H NMR** (500 MHz, CDCl<sub>3</sub>): δ 7.45 (t, *J* = 7.7 Hz, 2H), 7.36-7.32(m, 3H), 4.31-4.24 (m, 8H), 3.88-3.86 (m, 4H), 1.35 (t, *J* = 7.0 Hz, 6H); **<sup>13</sup>C NMR** (125MHz, CDCl<sub>3</sub>): δ 168.3, 164.9, 149.9, 131.7, 128.9, 127.8, 126.4, 86.3, 66.9, 65.0, 64.9, 49.2, 15.9, 15.9; **<sup>31</sup>P NMR** (162 MHz, CDCl<sub>3</sub>): δ 89.0; **HRMS** (ESI): calcd for C<sub>18</sub>H<sub>23</sub>N<sub>2</sub>O<sub>5</sub>NaPS<sub>2</sub> [M + Na]<sup>+</sup> 465.0684, found 465.0686.

**S-(2,5-dioxo-1-phenyl-4-thiomorpholino-2,5-dihydro-1H-pyrrol-3-yl)**

**O,O-diethyl**

**phosphorodithioate**

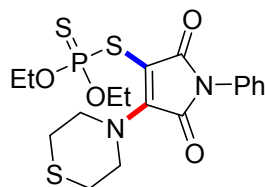

**4b**

Following the general procedure, using (petroleum ether : EtOAc = 9 : 1) as the eluant afforded a yellow liquid (62.3 mg, 68% yield). **<sup>1</sup>H NMR** (400 MHz, CDCl<sub>3</sub>): δ 7.47-7.42 (m, 2H), 7.37-7.31 (m, 3H), 4.46 (dt, *J* = 4.9, 2.4 Hz, 4H), 4.27 (dq, *J* = 9.4, 7.1 Hz, 4H), 2.87-2.84 (m, 4H), 1.35 (t, *J* = 7.1 Hz, 6H); **<sup>13</sup>C NMR** (100 MHz, CDCl<sub>3</sub>): δ 168.3, 164.9, 150.0, 131.6, 128.9, 127.9, 126.3, 87.0, 65.0, 64.9, 51.9, 28.1, 15.9, 15.9; **<sup>31</sup>P NMR** (162 MHz, CDCl<sub>3</sub>): δ 89.1; **HRMS** (ESI): calcd for C<sub>18</sub>H<sub>23</sub>N<sub>2</sub>O<sub>4</sub>NaPS<sub>3</sub> [M + Na]<sup>+</sup> 481.0455, found 481.0457.

**tert-butyl 4-(4-((diethoxyphosphorothioyl)thio)-2,5-dioxo-1-phenyl-2,5-dihydro-1H-pyrrol-3-yl)piperazine-1-carboxylate**

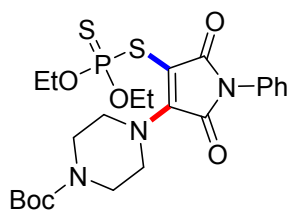

**4c**

Following the general procedure, using (petroleum ether : EtOAc = 9 : 1) as the eluant afforded a yellow liquid (83.3 mg, 77% yield). **<sup>1</sup>H NMR** (400 MHz, CDCl<sub>3</sub>): δ 7.51-7.46 (m, 2H), 7.41-7.34 (m, 3H), 4.35-4.27 (m, 4H), 4.00 (t, *J* = 5.0 Hz, 1H), 3.64 (dt, *J* = 18.4, 5.2 Hz, 4H), 1.68-1.67 (m, 1H), 1.53 (s, 9H), 1.46-1.45 (m, 1H), 1.39 (t, *J* = 7.1 Hz, 4H), 1.29 (s, 2H); **<sup>13</sup>C NMR** (125 MHz, CDCl<sub>3</sub>): δ 168.3, 165.2, 154.4, 131.6, 129.0, 129.0, 127.9, 126.4, 126.2, 80.6, 65.1, 65.0, 48.6, 48.0, 29.7, 28.4, 15.9, 15.9; **<sup>31</sup>P NMR** (162 MHz, CDCl<sub>3</sub>): δ 89.2; **HRMS** (ESI): calcd for C<sub>23</sub>H<sub>32</sub>N<sub>3</sub>O<sub>6</sub>NaPS<sub>2</sub> [M + Na]<sup>+</sup> 564.1368, found 564.1369.

**S-(4-(4-acetylpiperazin-1-yl)-2,5-dioxo-1-phenyl-2,5-dihydro-1H-pyrrol-3-yl) O,O-diethyl phosphorodithioate**

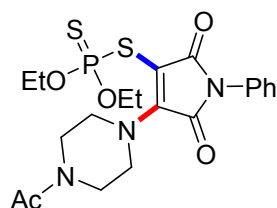

**4d**

Following the general procedure, using (petroleum ether : EtOAc = 9 : 1) as the eluant afforded a yellow liquid (67.6 mg, 70% yield). **<sup>1</sup>H NMR** (500 MHz, CDCl<sub>3</sub>): δ 7.47-7.44 (m, 2H), 7.38-7.32 (m, 3H), 4.31-4.24 (m, 8H), 3.83 (t, *J* = 5.3 Hz, 2H), 3.68 (t, *J* = 5.2 Hz, 2H), 2.15 (s, 3H), 1.36 (t, *J* = 7.1 Hz, 6H); **<sup>13</sup>C NMR** (125 MHz, CDCl<sub>3</sub>): δ 169.2, 168.2, 164.9, 150.2, 131.6, 129.0, 127.9, 126.4, 87.3, 65.2, 65.1, 48.6, 48.4, 46.0, 41.2, 21.3, 16.0, 15.9; **<sup>31</sup>P NMR** (162 MHz, CDCl<sub>3</sub>): δ 89.0; **HRMS** (ESI): calcd for C<sub>20</sub>H<sub>26</sub>N<sub>3</sub>O<sub>5</sub>NaPS<sub>2</sub> [M + Na]<sup>+</sup> 506.0949, found 506.0956.

**benzyl 4-(4-((diethoxyphosphorothioyl)thio)-2,5-dioxo-1-phenyl-2,5-dihydro-1H-pyrrol-3-yl)piperazine-1-carboxylate**

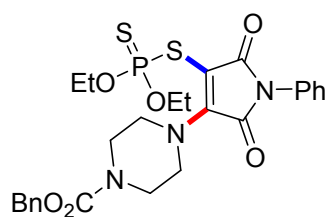

**4e**

Following the general procedure, using (petroleum ether : EtOAc = 9 : 1) as the eluant afforded a yellow liquid (75.9 mg, 66% yield). **<sup>1</sup>H NMR** (500 MHz, CDCl<sub>3</sub>): δ 7.44 (t, *J* = 7.8 Hz, 2H), 7.38-7.31 (m, 8H), 5.17 (s, 2H), 4.26-4.23 (m, 8H), 3.71 (t, *J* = 5.3 Hz, 4H), 1.34 (t, *J* = 7.0 Hz, 6H); **<sup>13</sup>C NMR** (125 MHz, CDCl<sub>3</sub>): δ 168.3, 164.9, 155.0, 150.2, 136.3, 131.6, 129.0, 128.6, 128.3, 128.1, 127.9, 126.4, 87.0, 67.6, 65.1, 65.1, 48.5, 43.8, 16.0, 15.9; **<sup>31</sup>P NMR** (162 MHz, CDCl<sub>3</sub>): δ 89.1; **HRMS** (ESI): calcd for C<sub>26</sub>H<sub>30</sub>N<sub>3</sub>O<sub>6</sub>NaPS<sub>2</sub> [M + Na]<sup>+</sup> 598.1211, found 598.1218.

**tert-butyl (1-(4-((diethoxyphosphorothioyl)thio)-2,5-dioxo-1-phenyl-2,5-dihydro-1H-pyrrol-3-yl)piperidin-4-yl)carbamate**

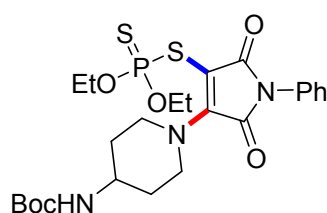

**4f**

Following the general procedure, using (petroleum ether : EtOAc = 9 : 1) as the eluant afforded a yellow solid (61.1 mg, 55% yield), Mp = 111-112°C. **<sup>1</sup>H NMR** (500 MHz, CDCl<sub>3</sub>): δ 7.44 (t, *J* = 7.8 Hz, 2H), 7.35-7.31 (m, 3H), 5.07 (d, *J* = 13.5 Hz, 2H), 4.53 (brs, 1H), 4.29-4.23 (m, 4H), 3.77 (brs, 1H), 3.36 (t, *J* = 12.7 Hz, 2H), 2.13-2.09 (m, 2H), 1.65-1.57 (m, 2H), 1.45 (s, 9H), 1.35 (t, *J* = 7.0 Hz, 6H); **<sup>13</sup>C NMR** (125 MHz, CDCl<sub>3</sub>): δ 168.5, 164.9, 155.0, 150.4, 131.7, 129.2, 128.9, 127.8, 126.4, 126.4, 86.1, 79.7, 64.9, 64.9, 48.2, 47.2, 32.9, 28.4, 16.0, 15.9; **<sup>31</sup>P NMR** (162 MHz, CDCl<sub>3</sub>): δ 89.8; **HRMS** (ESI): calcd for C<sub>24</sub>H<sub>34</sub>N<sub>3</sub>O<sub>6</sub>NaPS<sub>2</sub> [M + Na]<sup>+</sup> 578.1524, found 578.1531.

**methyl 1-(4-((diethoxyphosphorothioyl)thio)-2,5-dioxo-1-phenyl-2,5-dihydro-1H-pyrrol-3-yl)piperidine-4-carboxylate**

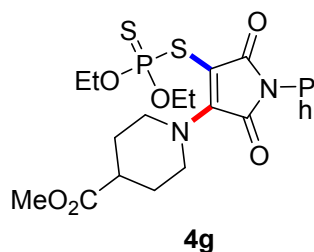

Following the general procedure, using (petroleum ether : EtOAc = 9 : 1) as the eluant afforded a yellow liquid (67.7 mg, 68% yield). **<sup>1</sup>H NMR** (500 MHz, CDCl<sub>3</sub>): δ 7.44 (t, *J* = 7.8 Hz, 2H), 7.36-7.32 (m, 3H), 4.92 (dt, *J* = 13.7, 4.3 Hz, 2H), 4.27 (dq, *J* = 9.3, 7.1 Hz, 4H), 3.72 (s, 3H), 3.57-3.52 (m, 2H), 2.68 (tt, *J* = 10.3, 4.3 Hz, 1H), 2.11-2.07 (m, 2H), 1.96 (dtd, *J* = 14.2, 10.5, 3.8 Hz, 2H), 1.35 (t, *J* = 7.0 Hz, 6H); **<sup>13</sup>C NMR** (125 MHz, CDCl<sub>3</sub>): δ 174.2, 168.4, 164.9, 150.4, 131.8, 128.9, 127.7, 126.4, 86.0, 64.9, 64.9, 51.9, 48.5, 40.0, 28.5, 155.9, 15.9; **<sup>31</sup>P NMR** (162 MHz, CDCl<sub>3</sub>): δ 89.4; **HRMS** (ESI): calcd for C<sub>21</sub>H<sub>27</sub>N<sub>2</sub>O<sub>6</sub>NaPS<sub>2</sub> [M + Na]<sup>+</sup> 521.0946, found 521.0953.

**S-(2,5-dioxo-1-phenyl-4-(pyrrolidin-1-yl)-2,5-dihydro-1H-pyrrol-3-yl)phosphorodithioate**

**O,O-diethyl**

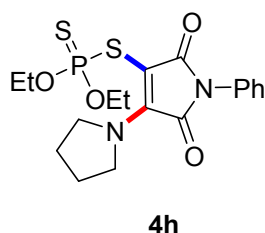

Following the general procedure, using (petroleum ether : EtOAc = 9 : 1) as the eluant afforded a yellow solid (63.9 mg, 75% yield), Mp = 135-136°C. **<sup>1</sup>H NMR** (500 MHz, CDCl<sub>3</sub>): δ 7.43 (t, *J* = 7.8 Hz, 2H), 7.35-7.31 (m, 3H), 4.29-4.07 (m, 8H), 1.99-1.96 (m, 4H), 1.33 (t, *J* = 7.4 Hz, 6H); **<sup>13</sup>C NMR** (125 MHz, CDCl<sub>3</sub>): δ 169.1, 164.3, 148.9, 132.0, 128.9, 127.6, 126.3, 81.3, 64.8, 64.7, 51.9, 25.4, 24.9, 15.9, 15.9; **<sup>31</sup>P NMR** (162 MHz, CDCl<sub>3</sub>): δ 90.9; **HRMS** (ESI): calcd for C<sub>18</sub>H<sub>23</sub>N<sub>2</sub>O<sub>4</sub>NaPS<sub>2</sub> [M + Na]<sup>+</sup> 449.0735, found 449.0739.

**S-(4-(dimethylamino)-2,5-dioxo-1-phenyl-2,5-dihydro-1H-pyrrol-3-yl)phosphorodithioate**

**O,O-diethyl**

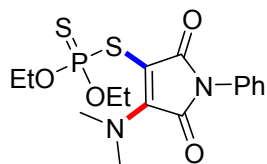

**4i**

Following the general procedure, using (petroleum ether : EtOAc = 9 : 1) as the eluant afforded a yellow solid (63.2 mg, 79% yield), Mp = 133-134°C. **<sup>1</sup>H NMR** (500 MHz, CDCl<sub>3</sub>): δ 7.44 (dd, *J* = 8.8, 6.8 Hz, 2H), 7.35-7.32 (m, 3H), 4.27 (dq, *J* = 9.2, 7.0 Hz, 4H), 3.60 (d, *J* = 3.3 Hz, 6H), 1.34 (t, *J* = 7.0 Hz, 6H); **<sup>13</sup>C NMR** (125 MHz, CDCl<sub>3</sub>): δ 168.7, 164.7, 151.0, 150.9, 131.9, 128.9, 127.7, 126.4, 83.9, 64.8, 64.8, 43.2, 15.9, 15.9; **<sup>31</sup>P NMR** (162 MHz, CDCl<sub>3</sub>): δ 90.2; **HRMS** (ESI): calcd for C<sub>16</sub>H<sub>21</sub>N<sub>2</sub>O<sub>4</sub>NaPS<sub>2</sub> [M + Na]<sup>+</sup> 423.0578, found 423.0576.

**S-(4-(diethylamino)-2,5-dioxo-1-phenyl-2,5-dihydro-1H-pyrrol-3-yl) phosphorodithioate**

**O,O-diethyl**

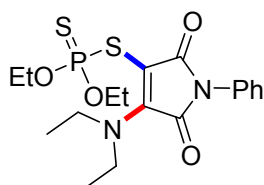

**4j**

Following the general procedure, using (petroleum ether : EtOAc = 9 : 1) as the eluant afforded a yellow solid (66.8 mg, 78% yield), Mp = 57-58°C. **<sup>1</sup>H NMR** (500 MHz, CDCl<sub>3</sub>): δ 7.44 (t, *J* = 7.7 Hz, 2H), 7.35-7.30 (m, 3H), 4.27 (p, *J* = 7.1 Hz, 4H), 4.01 (q, *J* = 7.2 Hz, 4H), 1.32 (dt, *J* = 20.0, 7.2 Hz, 12H); **<sup>13</sup>C NMR** (125 MHz, CDCl<sub>3</sub>): δ 168.8, 164.5, 149.1, 149.0, 131.9, 128.9, 127.6, 126.5, 126.4, 82.4, 64.8, 64.7, 47.2, 15.9, 15.9, 13.9; **<sup>31</sup>P NMR** (162 MHz, CDCl<sub>3</sub>): δ 90.6; **HRMS** (ESI): calcd for C<sub>18</sub>H<sub>25</sub>N<sub>2</sub>O<sub>4</sub>NaPS<sub>2</sub> [M + Na]<sup>+</sup> 451.0891, found 451.0897.

**S-(4-(benzyl(methyl)amino)-2,5-dioxo-1-phenyl-2,5-dihydro-1H-pyrrol-3-yl) phosphorodithioate**

**O,O-diethyl**

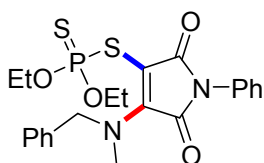

**4k**

Following the general procedure, using (petroleum ether : EtOAc = 9 : 1) as the eluant afforded a yellow solid (48.5 mg, 51% yield), Mp = 76-77°C. **<sup>1</sup>H NMR** (400 MHz, CDCl<sub>3</sub>): δ 7.50 (dd, *J* =

8.4, 7.1 Hz, 2H), 7.44-7.33 (m, 8H), 5.33-5.32 (m, 2H), 4.29 (dq,  $J = 9.4, 7.1, 4.2$  Hz, 4H), 3.57 (d,  $J = 3.3$  Hz, 3H), 1.37 (t,  $J = 7.1$  Hz, 6H);  $^{13}\text{C}$  NMR (125 MHz,  $\text{CDCl}_3$ ):  $\delta$  168.6, 164.8, 150.7, 150.7, 135.8, 135.8, 131.8, 128.9, 128.9, 128.0, 127.8, 127.6, 126.4, 85.1, 64.9, 64.9, 57.1, 41.1, 15.9, 15.9;  $^{31}\text{P}$  NMR (162 MHz,  $\text{CDCl}_3$ ):  $\delta$  90.4; HRMS (ESI): calcd for  $\text{C}_{22}\text{H}_{25}\text{N}_2\text{O}_4\text{NaPS}_2$  [ $\text{M} + \text{Na}$ ] $^+$  499.0891, found 499.0894.

**O,O-diethyl S-(4-(methyl(phenethyl)amino)-2,5-dioxo-1-phenyl-2,5-dihydro-1H-pyrrol-3-yl) phosphorodithioate**

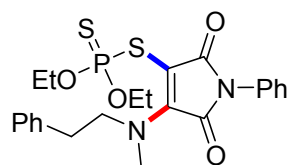

**4l**

Following the general procedure, using (petroleum ether : EtOAc = 9 : 1) as the eluant afforded a yellow solid (51.9 mg, 53% yield), Mp = 80-81°C.  $^1\text{H}$  NMR (500 MHz,  $\text{CDCl}_3$ ):  $\delta$  7.45 (t,  $J = 7.8$  Hz, 2H), 7.36-7.28 (m, 7H), 7.24-7.22 (m, 1H), 4.28-4.17 (m, 6H), 3.59 (d,  $J = 3.4$  Hz, 3H), 3.02 (t,  $J = 7.9$  Hz, 2H), 1.32 (t,  $J = 7.0$  Hz, 6H);  $^{13}\text{C}$  NMR (125 MHz,  $\text{CDCl}_3$ ):  $\delta$  168.6, 164.6, 137.7, 131.8, 129.0, 128.9, 128.7, 127.8, 126.8, 126.5, 84.1, 64.9, 64.8, 56.2, 42.1, 34.8, 15.9, 15.9;  $^{31}\text{P}$  NMR (162 MHz,  $\text{CDCl}_3$ ):  $\delta$  90.5; HRMS (ESI): calcd for  $\text{C}_{23}\text{H}_{27}\text{N}_2\text{O}_4\text{NaPS}_2$  [ $\text{M} + \text{Na}$ ] $^+$  513.1048, found 513.1045.

**S-(4-((2-cyanoethyl)(methyl)amino)-2,5-dioxo-1-phenyl-2,5-dihydro-1H-pyrrol-3-yl) O,O-diethyl phosphorodithioate**

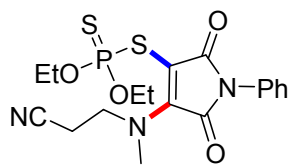

**4m**

Following the general procedure, using (petroleum ether : EtOAc = 9 : 1) as the eluant afforded a yellow liquid (57.1 mg, 65% yield).  $^1\text{H}$  NMR (500 MHz,  $\text{CDCl}_3$ ):  $\delta$  7.46 (t,  $J = 7.8$  Hz, 2H), 7.38-7.31 (m, 3H), 4.30-4.22 (m, 6H), 3.71 (d,  $J = 3.3$  Hz, 3H), 2.81 (t,  $J = 6.7$  Hz, 2H), 1.35 (t,  $J = 7.0$  Hz, 6H);  $^{13}\text{C}$  NMR (125 MHz,  $\text{CDCl}_3$ ):  $\delta$  168.3, 164.7, 149.8, 131.5, 129.1, 128.0, 126.4, 117.3, 87.4, 65.3, 65.2, 50.3, 42.6, 17.4, 15.9, 15.9;  $^{31}\text{P}$  NMR (162 MHz,  $\text{CDCl}_3$ ):  $\delta$  90.0; HRMS (ESI):



calcd for  $C_{18}H_{22}N_3O_4NaPS_2$   $[M + Na]^+$  462.0687, found 462.0688.

**O,O-diethyl  
phosphorodithioate**

**S-(1-methyl-4-morpholino-2,5-dioxo-2,5-dihydro-1H-pyrrol-3-yl)**

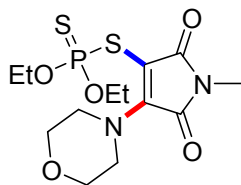

**5a**

Following the general procedure, using (petroleum ether : EtOAc = 9 : 1) as the eluant afforded a yellow solid (54.7 mg, 72% yield), Mp = 88-89°C.  $^1H$  NMR (500 MHz,  $CDCl_3$ ):  $\delta$  4.26-4.25 (m, 8H), 3.84-3.82 (m, 4H), 3.02 (s, 3H), 1.35 (t,  $J$  = 6.8 Hz, 6H);  $^{13}C$  NMR (125 MHz,  $CDCl_3$ ):  $\delta$  169.4, 166.1, 150.4, 85.1, 66.9, 64.9, 64.8, 48.9, 24.3, 15.9, 15.8;  $^{31}P$  NMR (162 MHz,  $CDCl_3$ ):  $\delta$  89.1; HRMS (ESI): calcd for  $C_{13}H_{21}N_2O_5NaPS_2$   $[M + Na]^+$  403.0527, found 403.0527.

**S-(1-(tert-butyl)-4-morpholino-2,5-dioxo-2,5-dihydro-1H-pyrrol-3-yl)**  
**phosphorodithioate**

**O,O-diethyl**

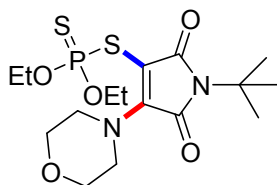

**5b**

Following the general procedure, using (petroleum ether : EtOAc = 9 : 1) as the eluant afforded a yellow solid (61.6 mg, 73% yield), Mp = 57-58°C.  $^1H$  NMR (500 MHz,  $CDCl_3$ ):  $\delta$  4.24 (dq,  $J$  = 9.4, 7.1 Hz, 4H), 4.15 (dq,  $J$  = 5.4, 2.3 Hz, 4H), 3.82 (t,  $J$  = 4.8 Hz, 4H), 1.58 (s, 9H), 1.34 (t,  $J$  = 7.1 Hz, 6H);  $^{13}C$  NMR (125 MHz,  $CDCl_3$ ):  $\delta$  170.4, 166.7, 150.0, 86.6, 66.9, 64.9, 64.8, 58.1, 48.9, 29.1, 15.9, 15.9;  $^{31}P$  NMR (162 MHz,  $CDCl_3$ ):  $\delta$  89.1; HRMS (ESI): calcd for  $C_{16}H_{27}N_2O_5NaPS_2$   $[M + Na]^+$  445.0997, found 445.0992.

**S-(1-cyclohexyl-4-morpholino-2,5-dioxo-2,5-dihydro-1H-pyrrol-3-yl)**  
**phosphorodithioate**

**O,O-diethyl**

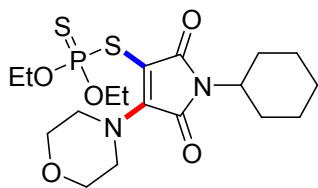

**5c**

Following the general procedure, using (petroleum ether : EtOAc = 9 : 1) as the eluant afforded a yellow liquid (66.3 mg, 74% yield). **<sup>1</sup>H NMR** (500 MHz, CDCl<sub>3</sub>): δ 4.23 (d, *J* = 7.5 Hz, 8H), 3.94 (t, *J* = 12.9 Hz, 1H), 3.84-3.82 (m, 4H), 2.05 (q, *J* = 12.7 Hz, 2H), 1.82 (d, *J* = 13.0 Hz, 2H), 1.65 (d, *J* = 12.3 Hz, 2H), 1.39-1.18 (m, 9H); **<sup>13</sup>C NMR** (125 MHz, CDCl<sub>3</sub>): δ 169.3, 165.9, 150.0, 85.4, 66.9, 64.8, 64.8, 51.4, 48.8, 29.9, 26.0, 25.1, 15.9, 15.9; **<sup>31</sup>P NMR** (162 MHz, CDCl<sub>3</sub>): δ 89.4; **HRMS** (ESI): calcd for C<sub>18</sub>H<sub>29</sub>N<sub>2</sub>O<sub>5</sub>NaPS<sub>2</sub> [M + Na]<sup>+</sup> 471.1153, found 471.1157.

**S-(1-benzyl-4-morpholino-2,5-dioxo-2,5-dihydro-1H-pyrrol-3-yl)**  
**phosphorodithioate**

**O,O-diethyl**

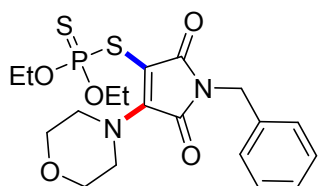

**5d**

Following the general procedure, using (petroleum ether : EtOAc = 9 : 1) as the eluant afforded a yellow liquid (64.8 mg, 71% yield). **<sup>1</sup>H NMR** (500 MHz, CDCl<sub>3</sub>): δ 7.35-7.27 (m, 5H), 4.67 (s, 2H), 4.25-4.21 (m, 8H), 3.81 (t, *J* = 4.8 Hz, 4H), 1.32 (t, *J* = 7.0 Hz, 6H); **<sup>13</sup>C NMR** (125 MHz, CDCl<sub>3</sub>): δ 169.1, 165.7, 150.2, 136.3, 128.6, 128.4, 127.7, 85.2, 66.9, 64.9, 64.9, 48.9, 41.9, 15.9, 15.8; **<sup>31</sup>P NMR** (162 MHz, CDCl<sub>3</sub>): δ 89.1; **HRMS** (ESI): calcd for C<sub>19</sub>H<sub>25</sub>N<sub>2</sub>O<sub>5</sub>NaPS<sub>2</sub> [M + Na]<sup>+</sup> 479.0840, found 479.0843.

**O,O-diethyl**      **S-(1-(4-methylbenzyl)-4-morpholino-2,5-dioxo-2,5-dihydro-1H-pyrrol-3-yl)**  
**phosphorodithioate**

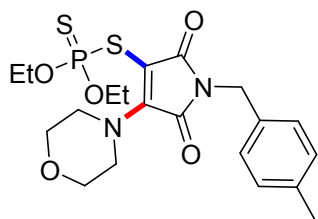

**5e**

Following the general procedure, using (petroleum ether : EtOAc = 9 : 1) as the eluant afforded a yellow solid (65.8 mg, 70% yield), Mp = 61-62°C. **<sup>1</sup>H NMR** (500 MHz, CDCl<sub>3</sub>): δ 7.24 (d, *J* = 7.6 Hz, 2H), 7.11 (d, *J* = 7.7 Hz, 2H), 4.63 (s, 2H), 4.24-4.23 (m, 8H), 3.80 (t, *J* = 4.7 Hz, 4H), 2.31 (s, 3H), 1.32 (t, *J* = 7.1 Hz, 6H); **<sup>13</sup>C NMR** (125 MHz, CDCl<sub>3</sub>): δ 169.1, 165.7, 150.3, 137.4, 133.3, 129.3, 128.4, 85.1, 66.9, 64.9, 64.8, 48.8, 41.7, 21.1, 15.9, 15.8; **<sup>31</sup>P NMR** (162 MHz, CDCl<sub>3</sub>): δ 89.0; **HRMS** (ESI): calcd for C<sub>20</sub>H<sub>27</sub>N<sub>2</sub>O<sub>5</sub>NaPS<sub>2</sub> [M + Na]<sup>+</sup> 493.0997, found 493.0995.

**O,O-diethyl S-(1-(4-methoxybenzyl)-4-morpholino-2,5-dioxo-2,5-dihydro-1H-pyrrol-3-yl)phosphorodithioate**

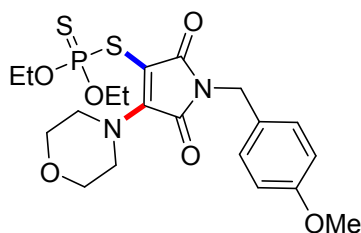

**5f**

Following the general procedure, using (petroleum ether : EtOAc = 9 : 1) as the eluant afforded a yellow liquid (71.9 mg, 74% yield). **<sup>1</sup>H NMR** (500 MHz, CDCl<sub>3</sub>): δ 7.29 (d, *J* = 8.2 Hz, 2H), 6.82 (d, *J* = 8.1 Hz, 2H), 4.61 (s, 2H), 4.24-4.21 (m, 8H), 3.82-3.77 (m, 7H), 1.32 (t, *J* = 7.1 Hz, 6H); **<sup>13</sup>C NMR** (125 MHz, CDCl<sub>3</sub>): δ 169.1, 165.7, 159.2, 150.3, 130.1, 129.9, 128.6, 113.9, 85.1, 66.9, 64.9, 64.8, 55.2, 48.8, 41.4, 15.9, 15.8; **<sup>31</sup>P NMR** (162 MHz, CDCl<sub>3</sub>): δ 89.0; **HRMS** (ESI): calcd for C<sub>20</sub>H<sub>27</sub>N<sub>2</sub>O<sub>6</sub>NaPS<sub>2</sub> [M + Na]<sup>+</sup> 509.0946, found 509.0950.

**O,O-diethyl S-(1-(4-fluorobenzyl)-4-morpholino-2,5-dioxo-2,5-dihydro-1H-pyrrol-3-yl)phosphorodithioate**

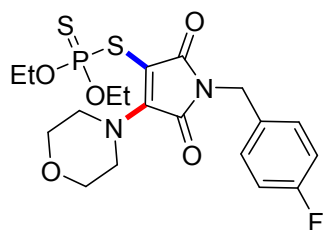

**5g**

Following the general procedure, using (petroleum ether : EtOAc = 9 : 1) as the eluant afforded a yellow liquid (56.9 mg, 60% yield). **<sup>1</sup>H NMR** (500 MHz, CDCl<sub>3</sub>): δ 7.34-7.32 (m, 2H), 7.00-6.97 (m, 2H), 4.64 (s, 2H), 4.26-4.21 (m, 8H), 3.83-3.81 (m, 4H), 1.32 (t, *J* = 7.1 Hz, 6H); **<sup>13</sup>C NMR** (125 MHz, CDCl<sub>3</sub>): δ 169.0, 165.6, 163.3, 161.4, 150.3, 132.1, 130.3, 130.2, 115.5, 115.4, 115.3, 85.3, 66.8, 64.9, 64.8, 48.9, 41.2, 15.9, 15.8; **<sup>31</sup>P NMR** (162 MHz, CDCl<sub>3</sub>): δ 89.3; **<sup>19</sup>F NMR** (375 MHz, CDCl<sub>3</sub>): δ -114.3 (s, 1F); **HRMS** (ESI): calcd for C<sub>19</sub>H<sub>24</sub>FN<sub>2</sub>O<sub>5</sub>NaPS<sub>2</sub> [*M* + Na]<sup>+</sup> 497.0746, found 497.0743.

**S-(1-(4-chlorobenzyl)-4-morpholino-2,5-dioxo-2,5-dihydro-1H-pyrrol-3-yl) O,O-diethyl phosphorodithioate**

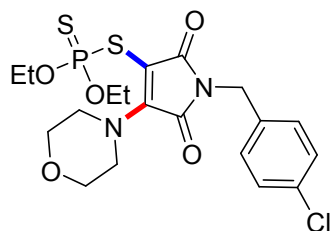

**5h**

Following the general procedure, using (petroleum ether : EtOAc = 9 : 1) as the eluant afforded a yellow liquid (63.7 mg, 65% yield). **<sup>1</sup>H NMR** (500 MHz, CDCl<sub>3</sub>): δ 7.28-7.26 (m, 4H), 4.63 (s, 2H), 4.25-4.21 (m, 8H), 3.82 (t, *J* = 4.8 Hz, 4H), 1.32 (t, *J* = 7.1 Hz, 6H); **<sup>13</sup>C NMR** (125 MHz, CDCl<sub>3</sub>): δ 168.9, 165.6, 150.2, 134.7, 133.7, 129.8, 128.8, 128.7, 85.3, 66.8, 64.9, 64.9, 48.9, 41.3, 15.9, 15.9; **<sup>31</sup>P NMR** (162 MHz, CDCl<sub>3</sub>): δ 89.3; **HRMS** (ESI): calcd for C<sub>19</sub>H<sub>24</sub>ClN<sub>2</sub>O<sub>5</sub>NaPS<sub>2</sub> [*M* + Na]<sup>+</sup> 513.0450, found 513.0453.

**S-(1-(4-bromobenzyl)-4-morpholino-2,5-dioxo-2,5-dihydro-1H-pyrrol-3-yl) O,O-diethyl phosphorodithioate**

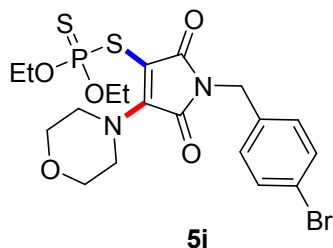

Following the general procedure, using (petroleum ether : EtOAc = 9 : 1) as the eluant afforded a yellow liquid (66.2 mg, 62% yield). **<sup>1</sup>H NMR** (500 MHz, CDCl<sub>3</sub>): δ 7.43 (d, *J* = 8.0 Hz, 2H), 7.22 (d, *J* = 8.0 Hz, 2H), 4.62 (s, 2H), 4.24-4.20 (m, 8H), 3.82 (t, *J* = 4.8 Hz, 4H), 1.32 (t, *J* = 7.1 Hz, 6H); **<sup>13</sup>C NMR** (125 MHz, CDCl<sub>3</sub>): δ 168.9, 165.6, 150.2, 135.3, 131.7, 130.2, 121.8, 85.4, 66.8, 64.9, 64.9, 48.9, 41.3, 15.9, 15.9; **<sup>31</sup>P NMR** (162 MHz, CDCl<sub>3</sub>): δ 89.3; **HRMS** (ESI): calcd for C<sub>19</sub>H<sub>24</sub>BrN<sub>2</sub>O<sub>5</sub>NaPS<sub>2</sub> [M + Na]<sup>+</sup> 556.9945, found 556.9945.

**O,O-diethyl S-(4-morpholino-2,5-dioxo-1-(4-(trifluoromethyl)benzyl)-2,5-dihydro-1H-pyrrol-3-yl) phosphorodithioate**

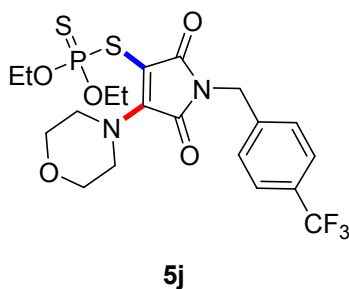

Following the general procedure, using (petroleum ether : EtOAc = 9 : 1) as the eluant afforded a yellow solid (57.6 mg, 55% yield), Mp = 86-87°C. **<sup>1</sup>H NMR** (500 MHz, CDCl<sub>3</sub>): δ 7.57 (d, *J* = 7.9 Hz, 2H), 7.45 (d, *J* = 8.0 Hz, 2H), 4.73 (s, 2H), 4.24 (dt, *J* = 10.1, 5.1 Hz, 8H), 3.82 (t, *J* = 4.7 Hz, 4H), 1.32 (t, *J* = 7.1 Hz, 6H); **<sup>13</sup>C NMR** (125 MHz, CDCl<sub>3</sub>): δ 168.9, 165.6, 150.2, 140.1, 130.2, 128.8, 128.6, 125.6, 125.5, 125.1, 122.9, 85.4, 66.8, 64.9, 64.9, 48.9, 41.4, 15.9, 15.8; **<sup>31</sup>P NMR** (162 MHz, CDCl<sub>3</sub>): δ 89.4; **<sup>19</sup>F NMR** (375 MHz, CDCl<sub>3</sub>): δ -62.5 (s, 3F); **HRMS** (ESI): calcd for C<sub>20</sub>H<sub>24</sub>F<sub>3</sub>N<sub>2</sub>O<sub>5</sub>NaPS<sub>2</sub> [M + Na]<sup>+</sup> 547.0714, found 547.0720.

**O,O-diethyl S-(4-morpholino-1-(naphthalen-1-ylmethyl)-2,5-dioxo-2,5-dihydro-1H-pyrrol-3-yl) phosphorodithioate**

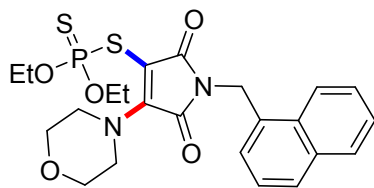

**5k**

Following the general procedure, using (petroleum ether : EtOAc = 9 : 1) as the eluant afforded a yellow liquid (73.9 mg, 73% yield). **<sup>1</sup>H NMR** (500 MHz, CDCl<sub>3</sub>): δ 8.26 (d, *J* = 8.5 Hz, 1H), 7.85 (d, *J* = 8.1 Hz, 1H), 7.79 (d, *J* = 8.1 Hz, 1H), 7.53 (td, *J* = 14.6, 13.2, 7.4 Hz, 3H), 7.42 (t, *J* = 7.6 Hz, 1H), 5.15 (s, 2H), 4.24-4.21 (m, 8H), 3.80 (t, *J* = 4.7 Hz, 4H), 1.30 (t, *J* = 7.1 Hz, 6H); **<sup>13</sup>C NMR** (125 MHz, CDCl<sub>3</sub>): δ 169.2, 165.9, 150.2, 133.8, 131.4, 131.2, 128.7, 128.5, 127.1, 126.5, 125.8, 125.2, 123.5, 85.4, 66.8, 64.9, 64.9, 48.9, 39.9, 15.9, 15.9; **<sup>31</sup>P NMR** (162 MHz, CDCl<sub>3</sub>): δ 89.2; **HRMS** (ESI): calcd for C<sub>23</sub>H<sub>27</sub>N<sub>2</sub>O<sub>5</sub>NaPS<sub>2</sub> [M + Na]<sup>+</sup> 529.0997, found 529.0995.

**O,O-diethyl S-(4-morpholino-2,5-dioxo-1-(thiophen-2-ylmethyl)-2,5-dihydro-1H-pyrrol-3-yl) phosphorodithioate**

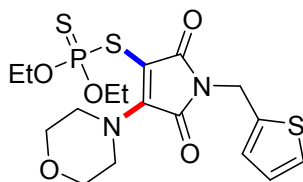

**5l**

Following the general procedure, using (petroleum ether : EtOAc = 9 : 1) as the eluant afforded a yellow liquid (62.8 mg, 68% yield). **<sup>1</sup>H NMR** (500 MHz, CDCl<sub>3</sub>): δ 7.21 (d, *J* = 5.2 Hz, 1H), 7.06 (d, *J* = 3.3 Hz, 1H), 6.93-6.91 (m, 1H), 4.84 (s, 2H), 4.26-4.22 (m, 8H), 3.83-3.81 (m, 4H), 1.33 (t, *J* = 6.9 Hz, 6H); **<sup>13</sup>C NMR** (125 MHz, CDCl<sub>3</sub>): δ 168.5, 165.3, 150.3, 138.1, 127.5, 126.8, 125.7, 85.3, 66.8, 64.9, 64.9, 48.9, 36.2, 15.9, 15.8; **<sup>31</sup>P NMR** (162 MHz, CDCl<sub>3</sub>): δ 88.8; **HRMS** (ESI): calcd for C<sub>17</sub>H<sub>23</sub>N<sub>2</sub>O<sub>5</sub>NaPS<sub>3</sub> [M + Na]<sup>+</sup> 485.0404, found 485.0404.

**S-(1-(3,4-dichlorobenzyl)-4-morpholino-2,5-dioxo-2,5-dihydro-1H-pyrrol-3-yl) O,O-diethyl phosphorodithioate**

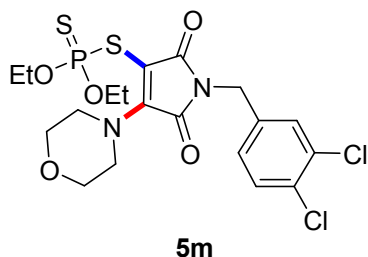

Following the general procedure, using (petroleum ether : EtOAc = 9 : 1) as the eluant afforded a yellow liquid (63.9 mg, 61% yield). **<sup>1</sup>H NMR** (500 MHz, CDCl<sub>3</sub>): δ 7.43 (s, 1H), 7.38 (d, *J* = 8.2 Hz, 1H), 7.19 (d, *J* = 10.0 Hz, 1H), 4.62 (s, 2H), 4.26-4.20 (m, 8H), 3.83 (t, *J* = 4.9 Hz, 4H), 1.33 (t, *J* = 7.1 Hz, 6H); **<sup>13</sup>C NMR** (125 MHz, CDCl<sub>3</sub>): δ 168.9, 165.5, 150.2, 136.3, 132.7, 132.0, 130.6, 130.4, 127.8, 85.2, 66.8, 65.0, 64.9, 48.9, 40.8, 15.9, 15.9; **<sup>31</sup>P NMR** (162 MHz, CDCl<sub>3</sub>): δ 89.3; **HRMS** (ESI): calcd for C<sub>19</sub>H<sub>23</sub>Cl<sub>2</sub>N<sub>2</sub>O<sub>5</sub>NaPS<sub>2</sub> [M + Na]<sup>+</sup> 547.0061, found 547.0058.

**(R)-O,O-diethyl S-(4-(methyl(3-phenyl-3-(*o*-tolylloxy)propyl)amino)-2,5-dioxo-1-phenyl-2,5-dihydro-1H-pyrrol-3-yl) phosphorodithioate**

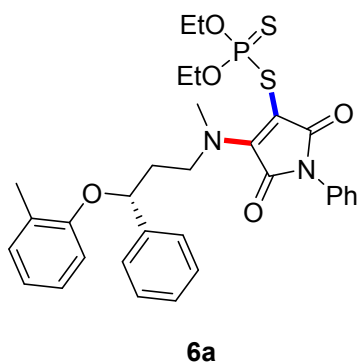

Following the general procedure, using (petroleum ether : EtOAc = 9 : 1) as the eluant afforded a yellow liquid (86.6 mg, 71% yield). **<sup>1</sup>H NMR** (500 MHz, CDCl<sub>3</sub>): δ 7.42 (t, *J* = 7.7 Hz, 2H), 7.36-7.30 (m, 5H), 7.25-7.24 (m, 3H), 7.12 (d, *J* = 7.4 Hz, 1H), 6.94 (t, *J* = 7.8 Hz, 1H), 6.78 (t, *J* = 7.4 Hz, 1H), 6.60 (d, *J* = 8.2 Hz, 1H), 5.32 (dd, *J* = 9.3, 3.7 Hz, 1H), 4.35-4.13 (m, 6H), 3.60 (d, *J* = 3.6 Hz, 3H), 2.40-2.30 (m, 4H), 2.30-2.23 (m, 1H), 1.32-1.29 (m, 6H); **<sup>13</sup>C NMR** (125 MHz, CDCl<sub>3</sub>): δ 168.6, 164.5, 155.5, 141.1, 131.8, 130.8, 128.9, 127.8, 127.7, 126.8, 126.7, 126.4, 125.7, 120.5, 112.6, 101.9, 84.1, 64.9, 64.9, 51.9, 42.0, 38.6, 37.3, 16.6, 15.9, 15.9; **<sup>31</sup>P NMR** (162 MHz, CDCl<sub>3</sub>): δ 90.7; **HRMS** (ESI): calcd for C<sub>31</sub>H<sub>35</sub>N<sub>2</sub>O<sub>5</sub>NaPS<sub>2</sub> [M + Na]<sup>+</sup> 633.1623, found 633.1629.

**S-(2,5-dioxo-1-phenyl-4-(3-(3,4,5-trimethoxybenzamido)piperidin-1-yl)-2,5-dihydro-1H-pyrrol-3-**

yl) O,O-diethyl phosphorodithioate

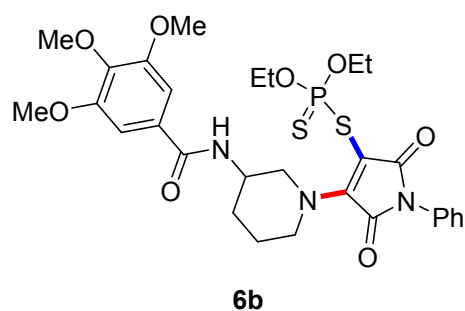

Following the general procedure, using (petroleum ether : EtOAc = 9 : 1) as the eluant afforded a yellow solid (81.8 mg, 63% yield), Mp = 146-147°C. **<sup>1</sup>H NMR** (500 MHz, CDCl<sub>3</sub>): δ 7.45 (t, J = 7.8 Hz, 2H), 7.37 (t, J = 7.4 Hz, 1H), 7.31-7.28 (m, 1H), 7.22 (brs, 1H), 7.06 (s, 2H), 4.58 (d, J = 13.5 Hz, 1H), 4.39 (d, J = 13.0 Hz, 1H), 4.40-4.24 (m, 5H), 4.15-4.10 (m, 1H), 3.83 (s, 3H), 3.68 (s, 6H), 2.35 (d, J = 10.6 Hz, 1H), 2.05 (s, 1H), 1.97-1.86 (m, 2H), 1.83-1.78 (m, 1H), 1.36 (t, J = 7.1 Hz, 6H), 1.26 (t, J = 6.8 Hz, 1H); **<sup>13</sup>C NMR** (125 MHz, CDCl<sub>3</sub>): δ 171.1, 168.1, 167.1, 166.2, 153.1, 152.5, 140.7, 131.5, 129.6, 129.0, 128.0, 126.2, 104.3, 89.8, 65.2, 60.8, 60.4, 56.0, 53.6, 50.6, 46.9, 27.8, 22.0, 21.0, 15.9, 14.2; **<sup>31</sup>P NMR** (162 MHz, CDCl<sub>3</sub>): δ 88.7; **HRMS** (ESI): calcd for C<sub>29</sub>H<sub>36</sub>N<sub>3</sub>O<sub>8</sub>NaPS<sub>2</sub> [M + Na]<sup>+</sup> 672.1579, found 672.1586.

**O,O-diethyl S-(4-(4-(6-fluorobenzo[d]isoxazol-3-yl)piperidin-1-yl)-2,5-dioxo-1-phenyl-2,5-dihydro-1H-pyrrol-3-yl) phosphorodithioate**

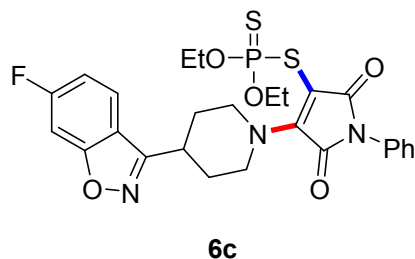

Following the general procedure, using (petroleum ether : EtOAc = 9 : 1) as the eluant afforded a yellow liquid (70.2 mg, 61% yield). **<sup>1</sup>H NMR** (500 MHz, CDCl<sub>3</sub>): δ 7.70 (dd, J = 8.7, 5.0 Hz, 1H), 7.45 (dd, J = 8.5, 7.2 Hz, 2H), 7.37-7.34 (m, 3H), 7.28 (d, J = 2.1 Hz, 1H), 7.09 (td, J = 8.8, 2.1 Hz, 1H), 5.18 (d, J = 13.6 Hz, 2H), 4.31-4.25 (m, 4H), 3.64 (qd, J = 7.7, 6.6, 3.4 Hz, 2H), 3.51-3.43 (m, 1H), 2.28 (dt, J = 9.6, 4.7 Hz, 4H), 1.35 (t, J = 7.1 Hz, 6H); **<sup>13</sup>C NMR** (125 MHz, CDCl<sub>3</sub>): δ 168.5, 165.3, 165.0, 164.1, 163.9, 159.8, 150.5, 131.7, 128.9, 127.8, 126.4, 122.3, 122.2, 116.9, 112.8, 112.6, 97.7, 97.5, 86.3, 65.0, 65.0, 48.9, 33.5, 30.6, 16.0, 15.9; **<sup>19</sup>F NMR** (375 MHz,



CDCl<sub>3</sub>):  $\delta$  -108.8 (s, 1F); **<sup>31</sup>P NMR** (162 MHz, CDCl<sub>3</sub>):  $\delta$  89.7; **HRMS** (ESI): calcd for C<sub>26</sub>H<sub>27</sub>FN<sub>3</sub>O<sub>5</sub>NaPS<sub>2</sub> [M + Na]<sup>+</sup> 598.1011, found 598.1014.

**O,O,O,O-tetraethyl trithiopyrophosphate**

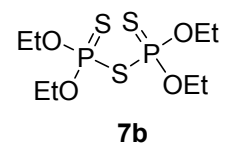

Using petroleum ether as the eluant afforded a green solid (64.2 mg, 95 % yield), Mp = 56-57°C.

**<sup>1</sup>H NMR** (400 MHz, CDCl<sub>3</sub>):  $\delta$  4.37-4.27 (m, 4H), 4.25-4.14 (m, 4H), 1.46-1.41 (12H); **<sup>31</sup>P NMR** (162 MHz, CDCl<sub>3</sub>):  $\delta$  84.7, 83.9; **HRMS** (ESI): calcd for C<sub>8</sub>H<sub>20</sub>O<sub>4</sub>NaP<sub>2</sub>S<sub>3</sub> [M + Na]<sup>+</sup> 360.9897, found 360.9898.

**References:**

(1) C. E. P. Galvis, V. V. Kouznetsov, *Org. Biomol. Chem.* **2013**, *11*, 407-411.

(2) L. M. Nguyen, M. E. Dellinger, J. T. Lee, R. A. Quinlan, A. L. Rheingold, R. D. Pike a, *Inorg. Chim. Acta.* **2005**, 358, 1331-1336.

**$^1\text{H}$ ,  $^{13}\text{C}$ ,  $^{19}\text{F}$  and  $^{31}\text{P}$  NMR spectra of product**

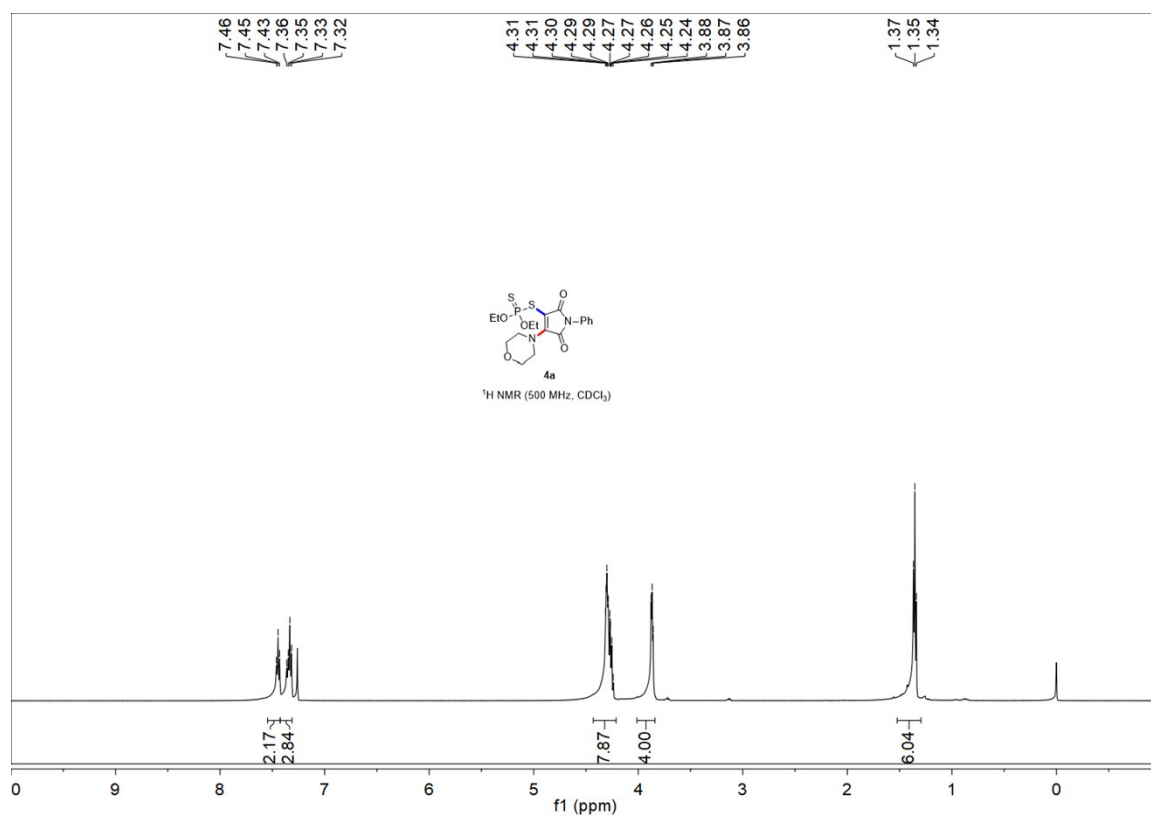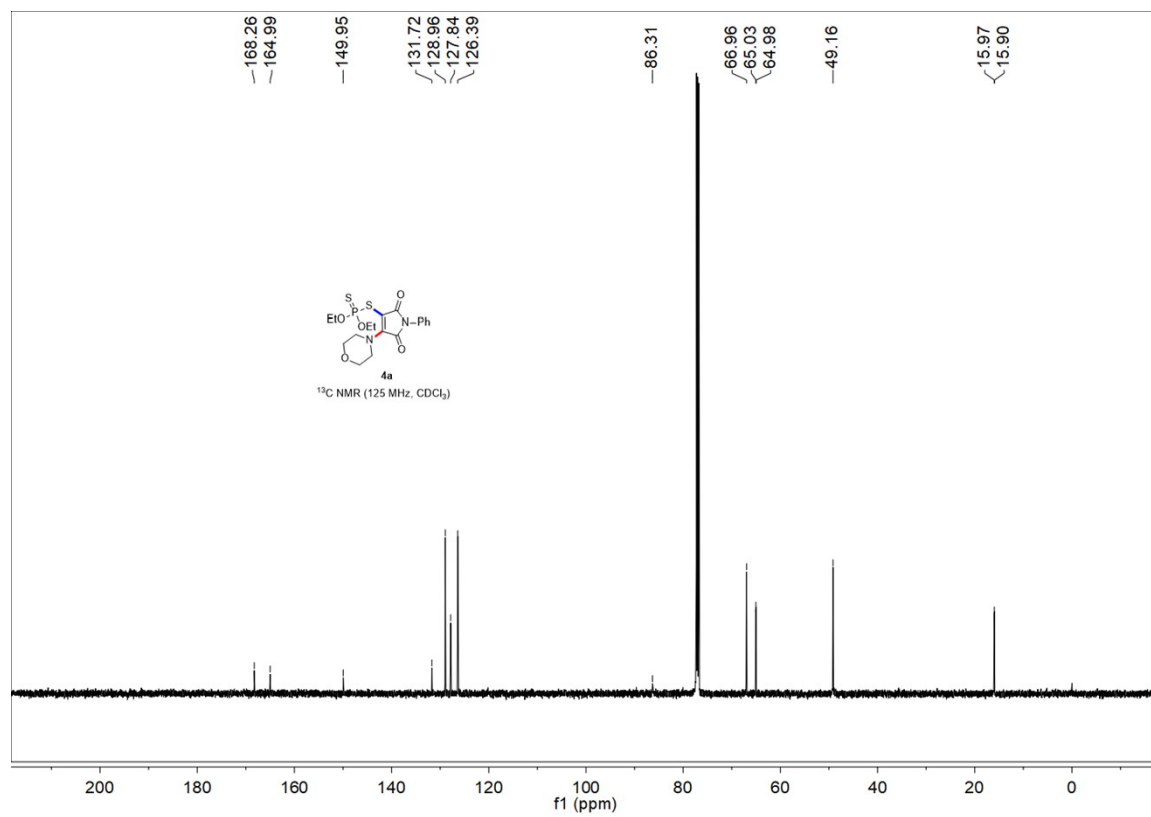

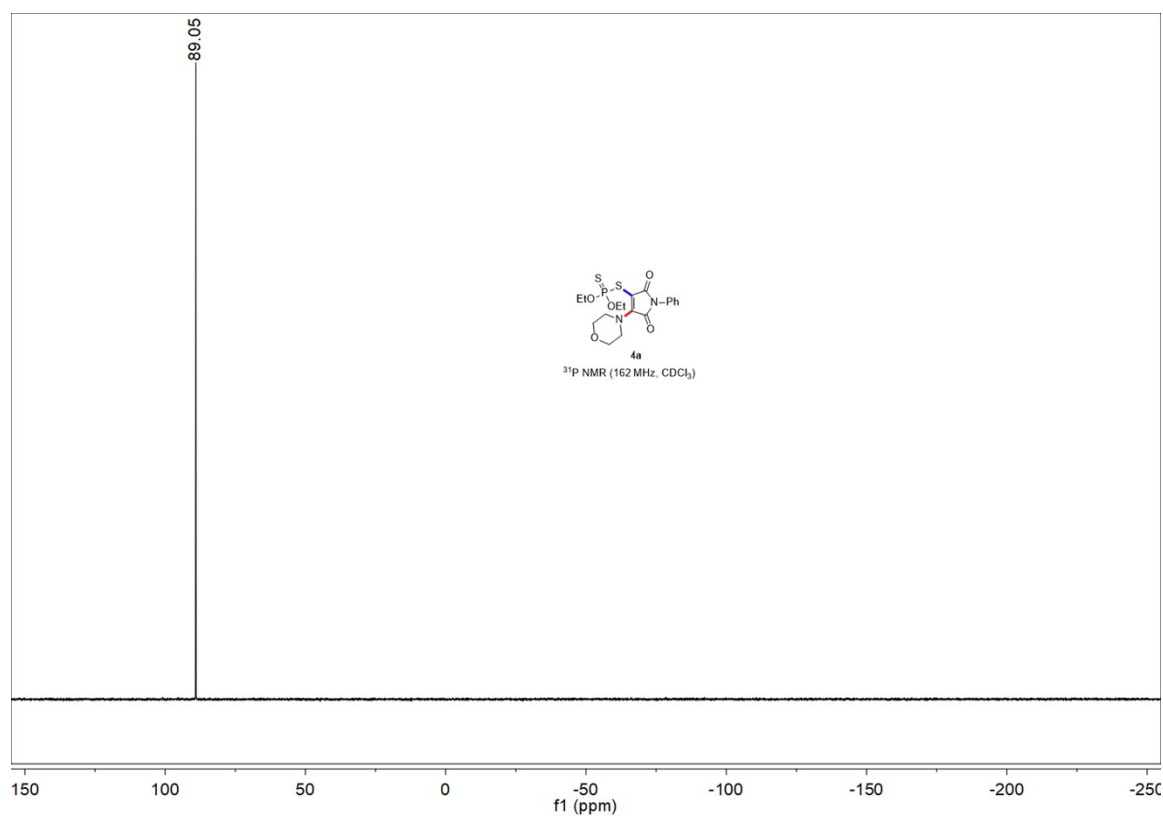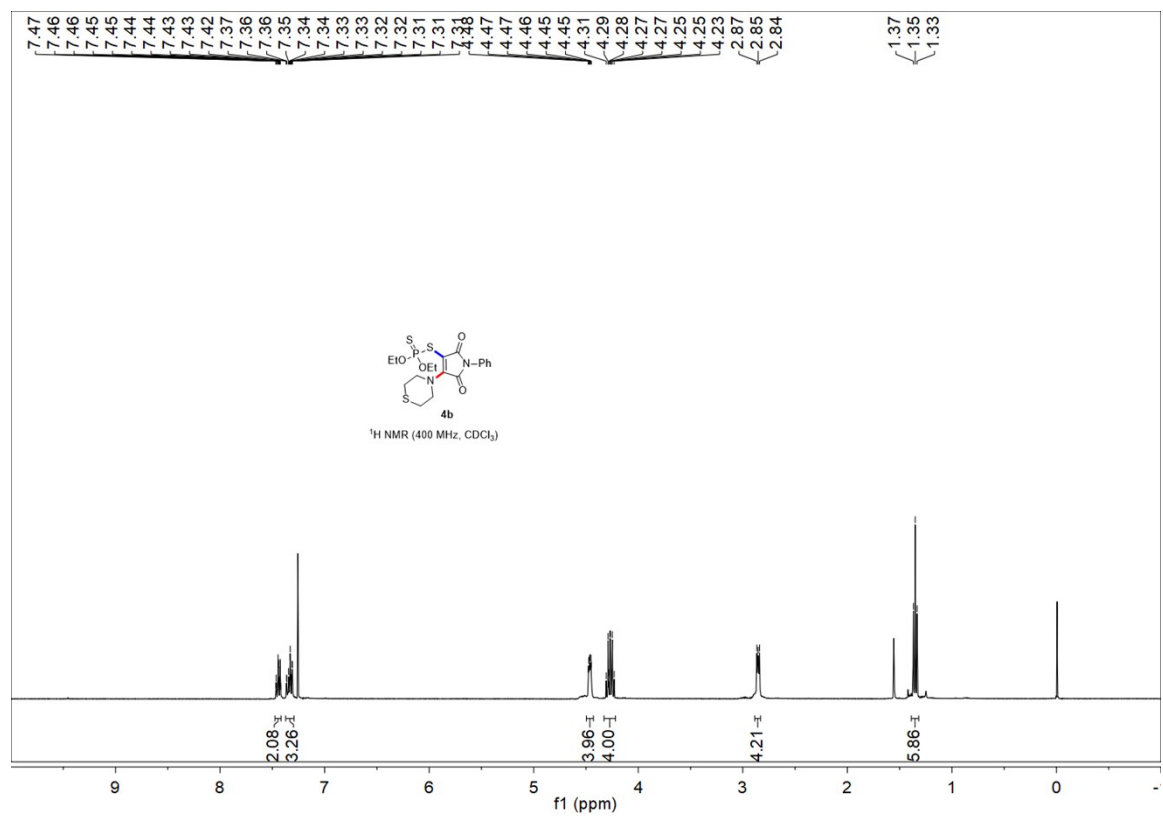

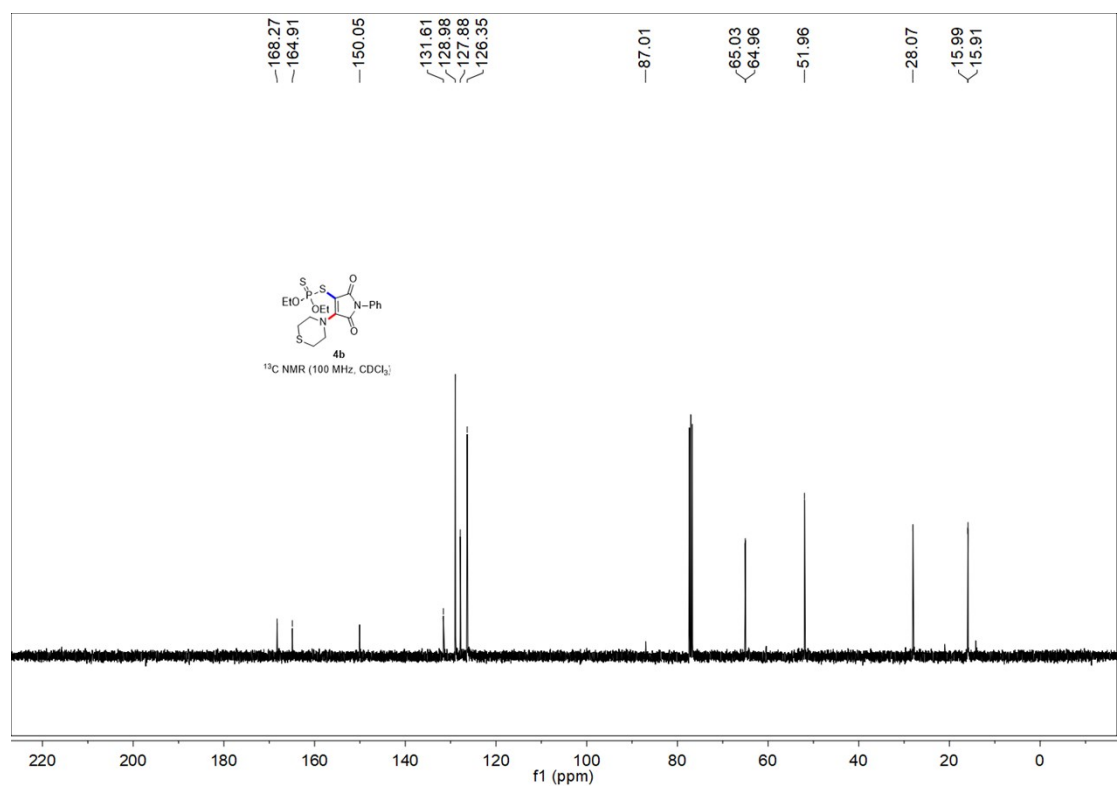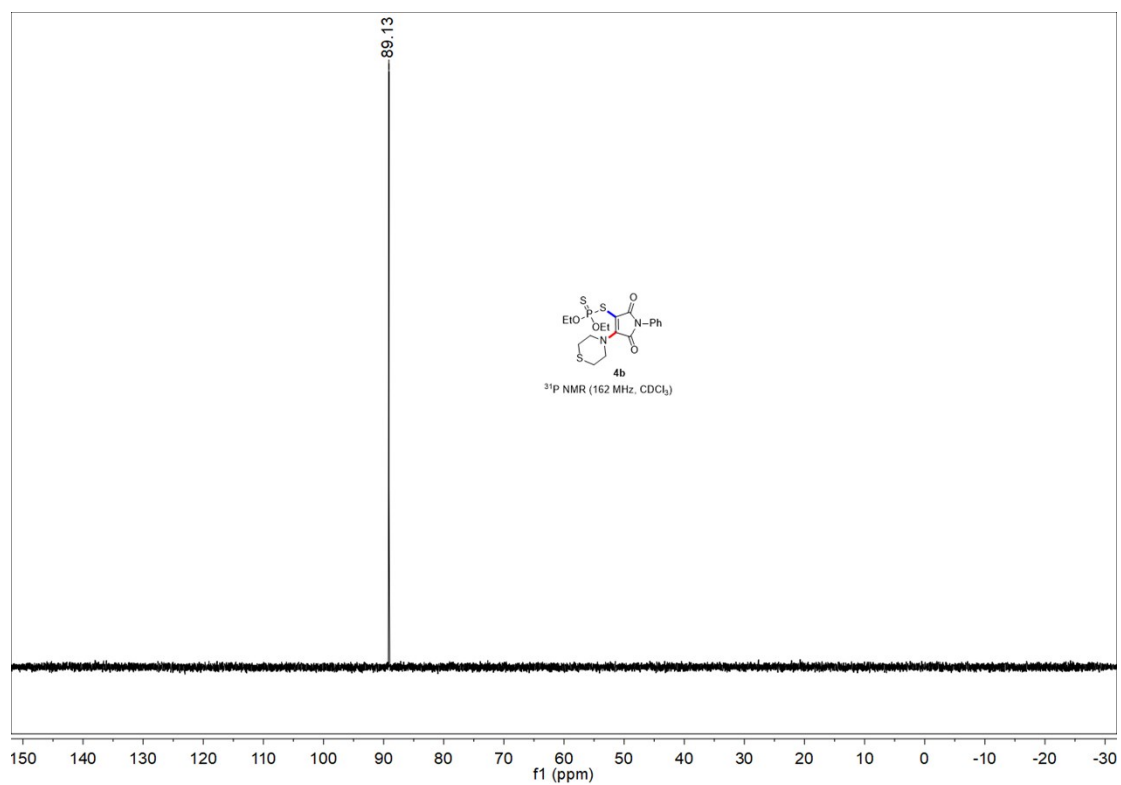

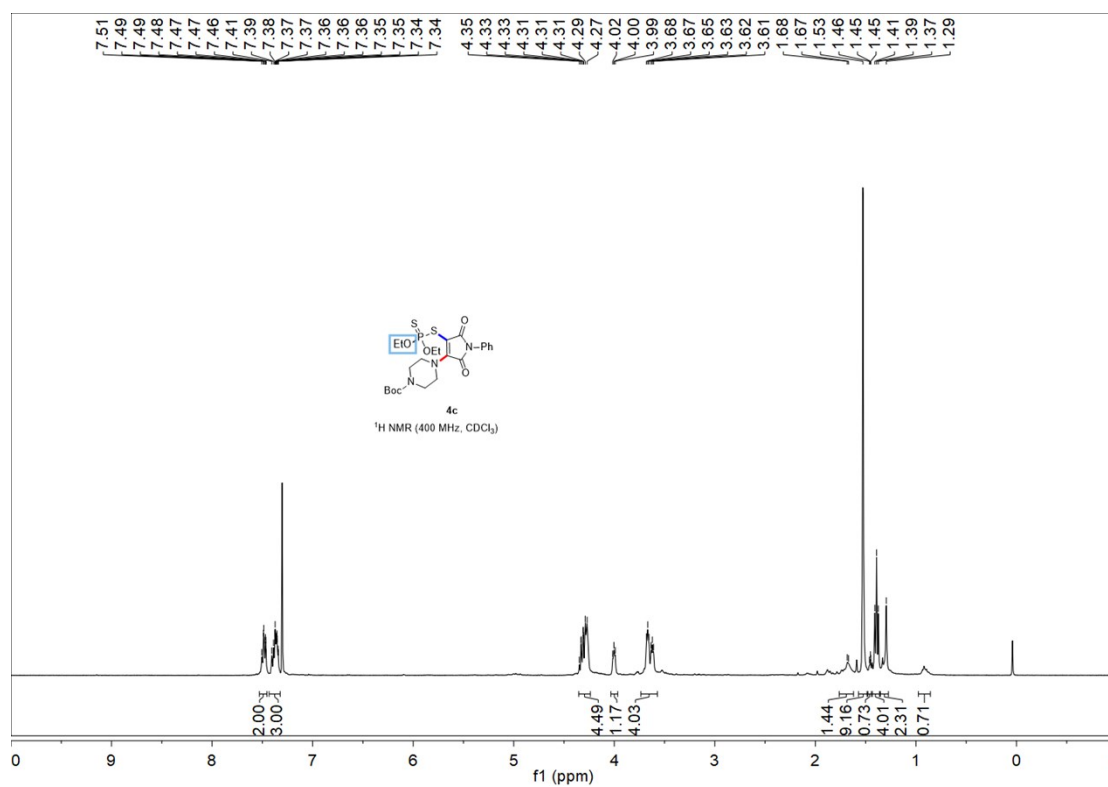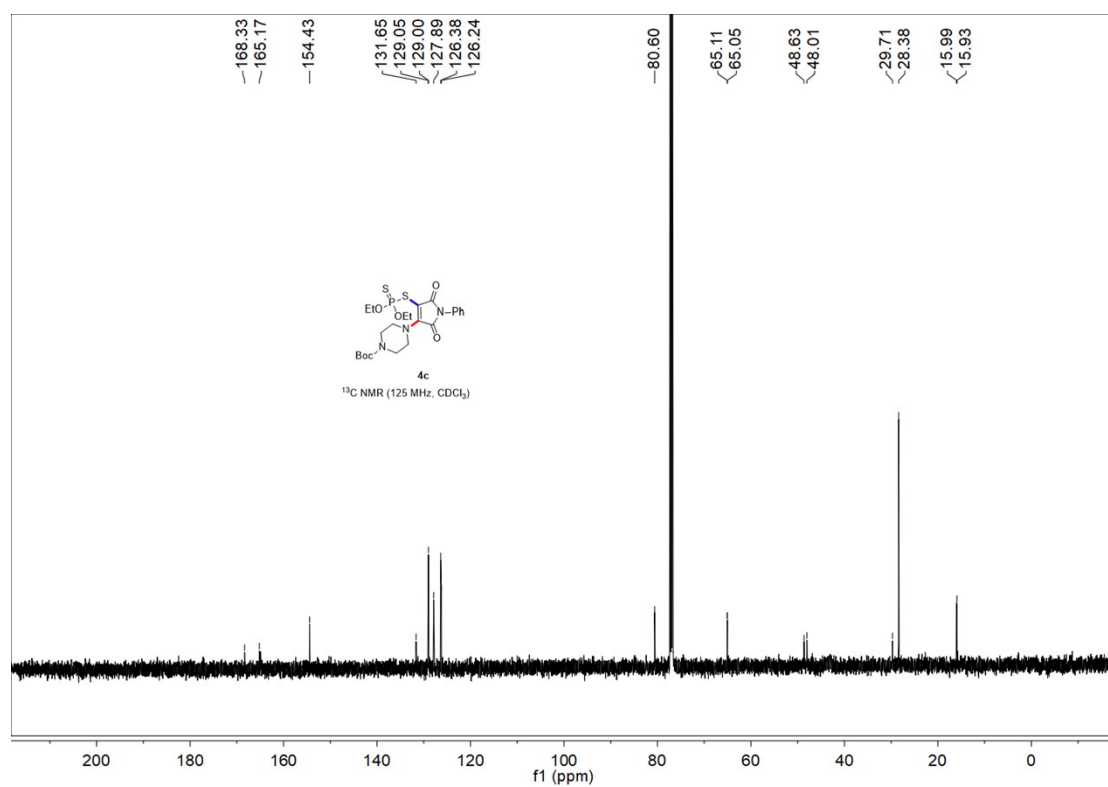

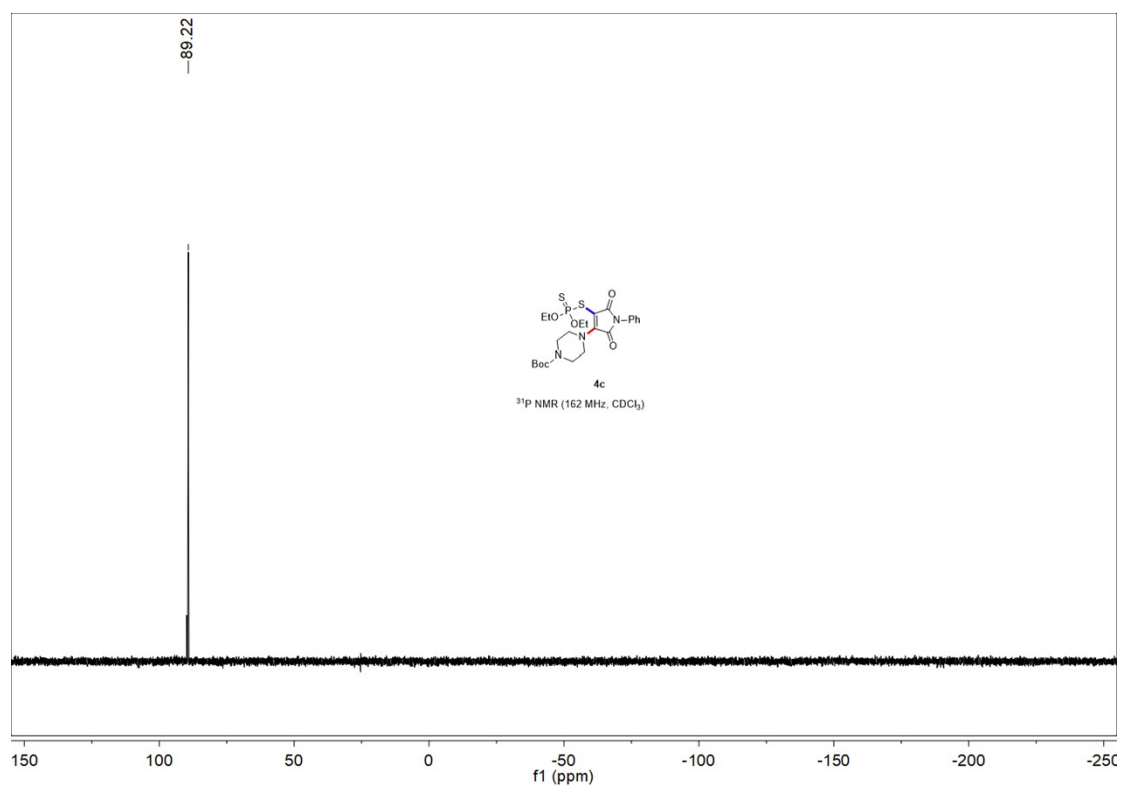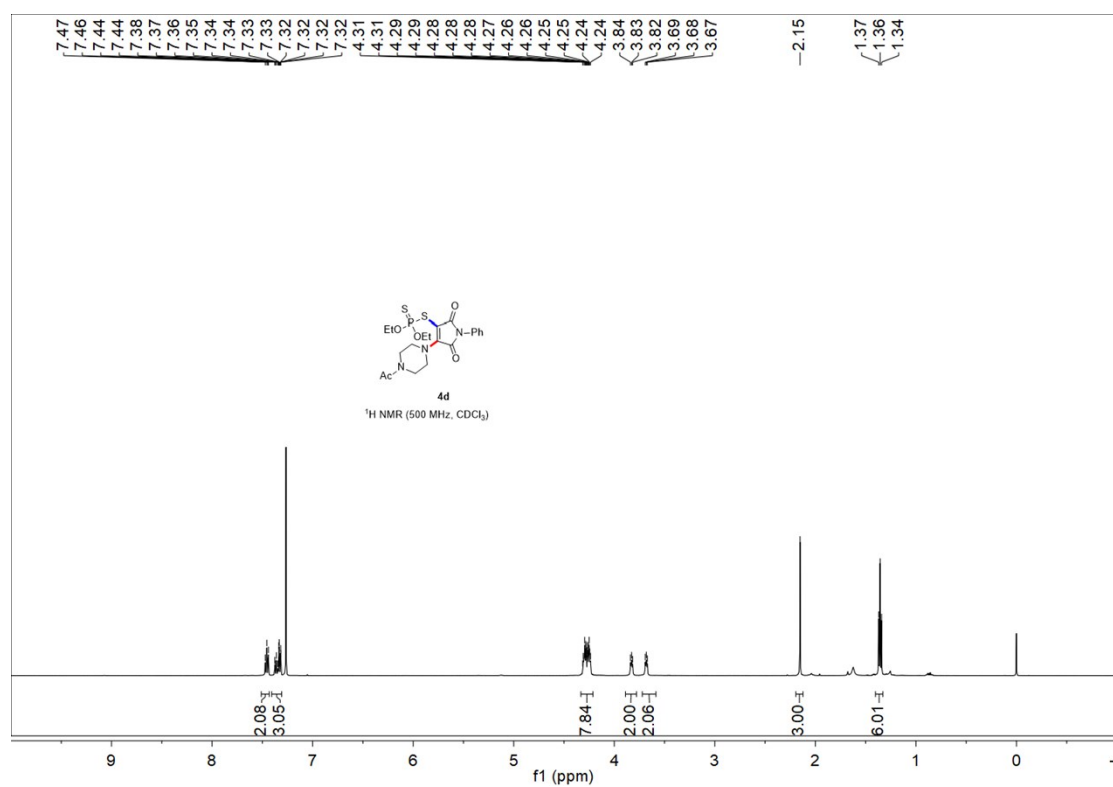

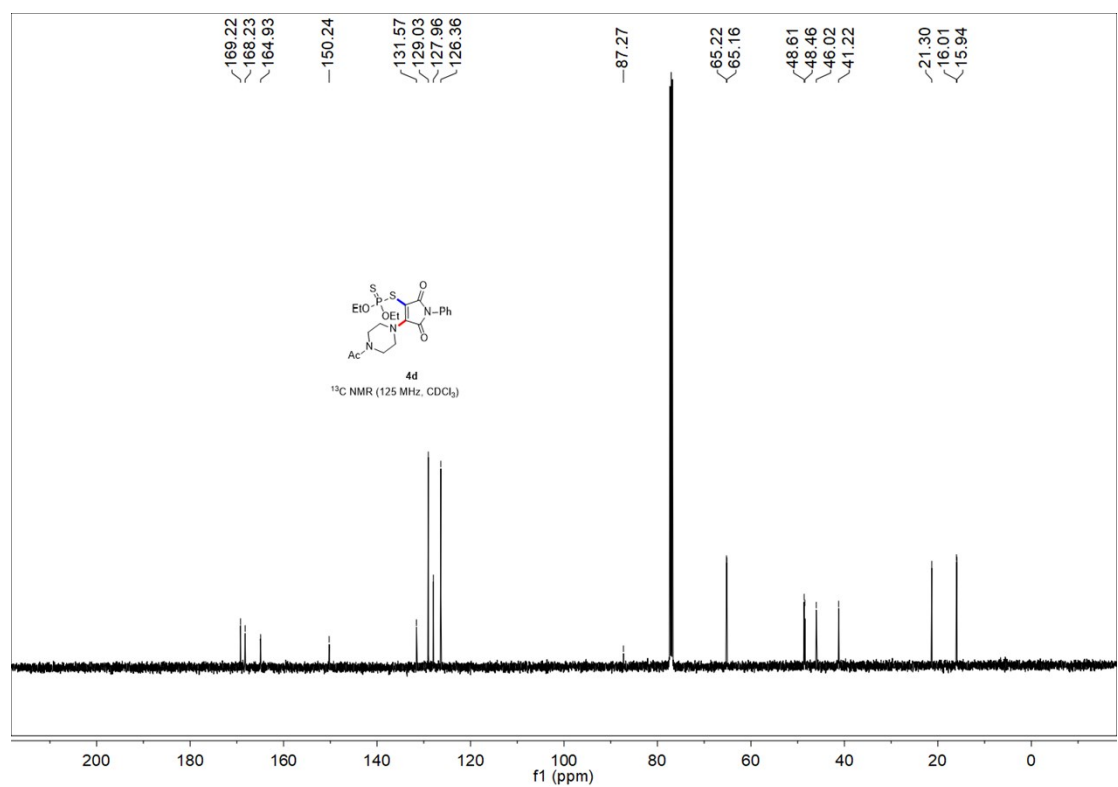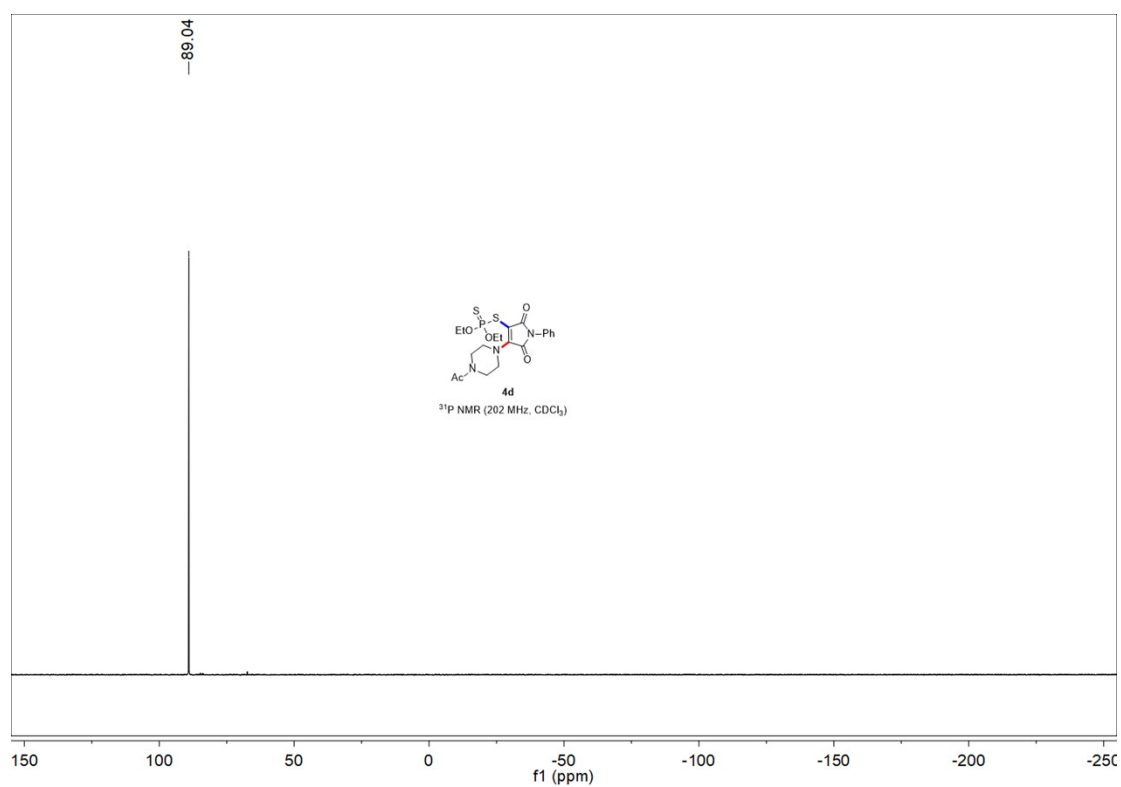



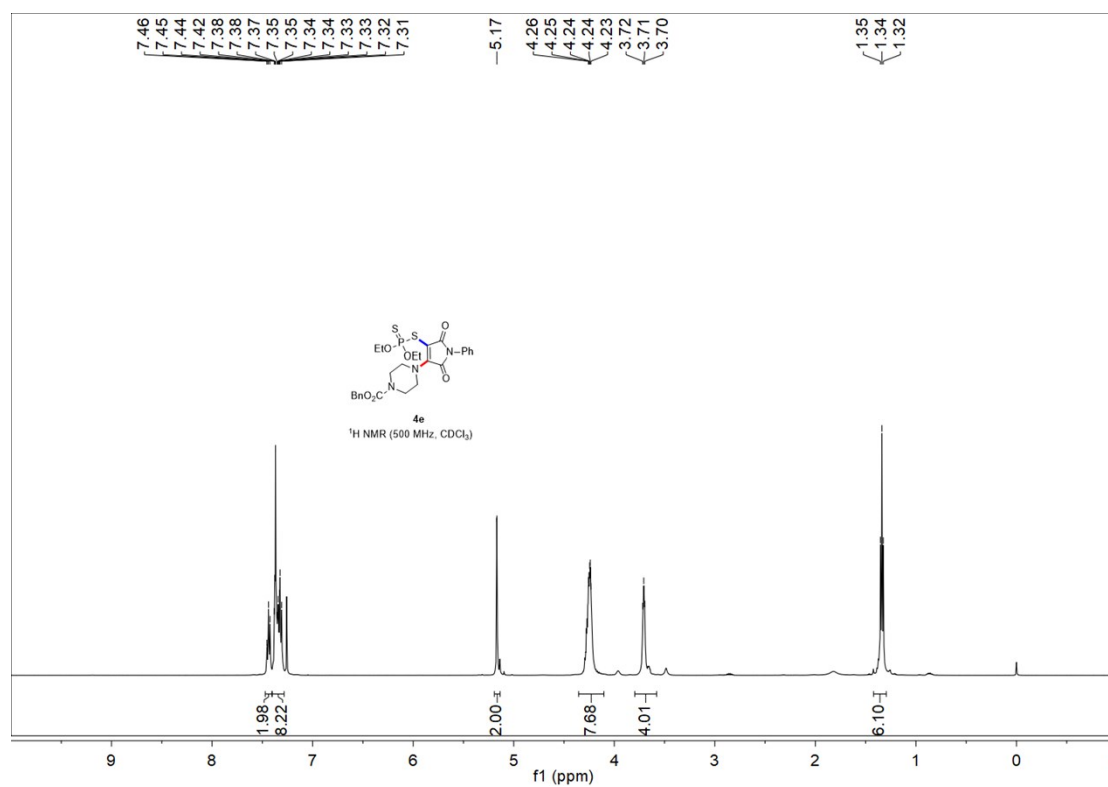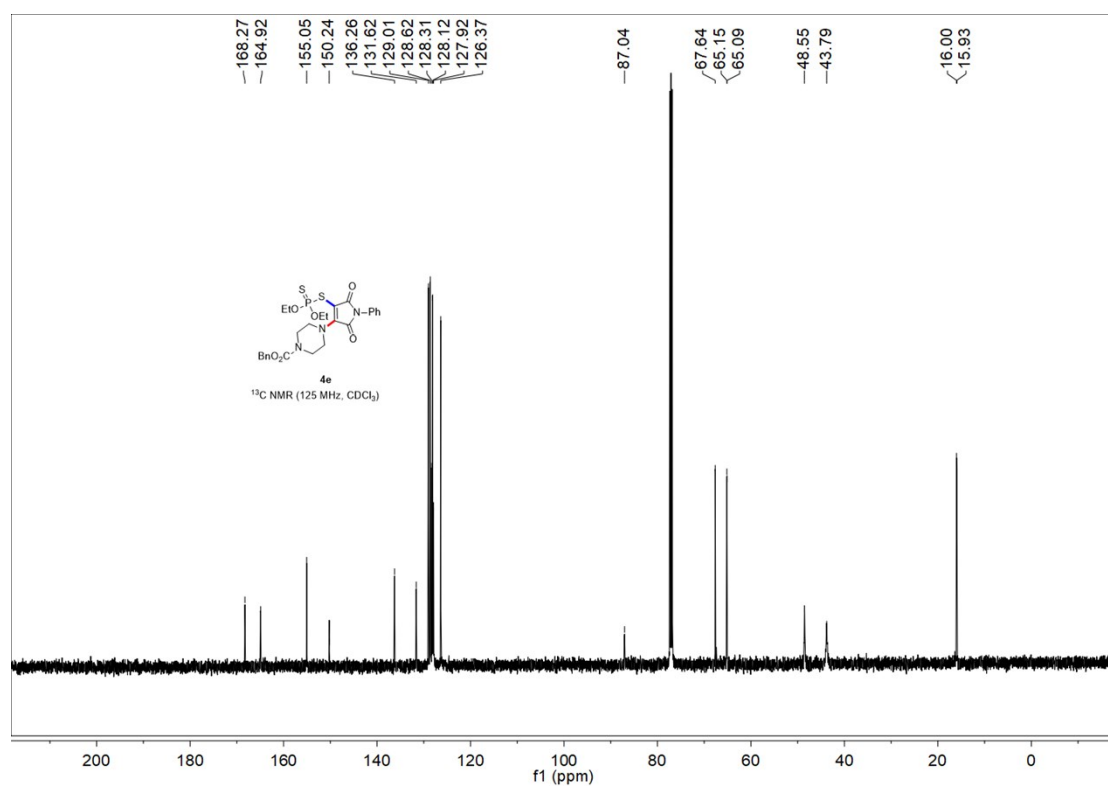

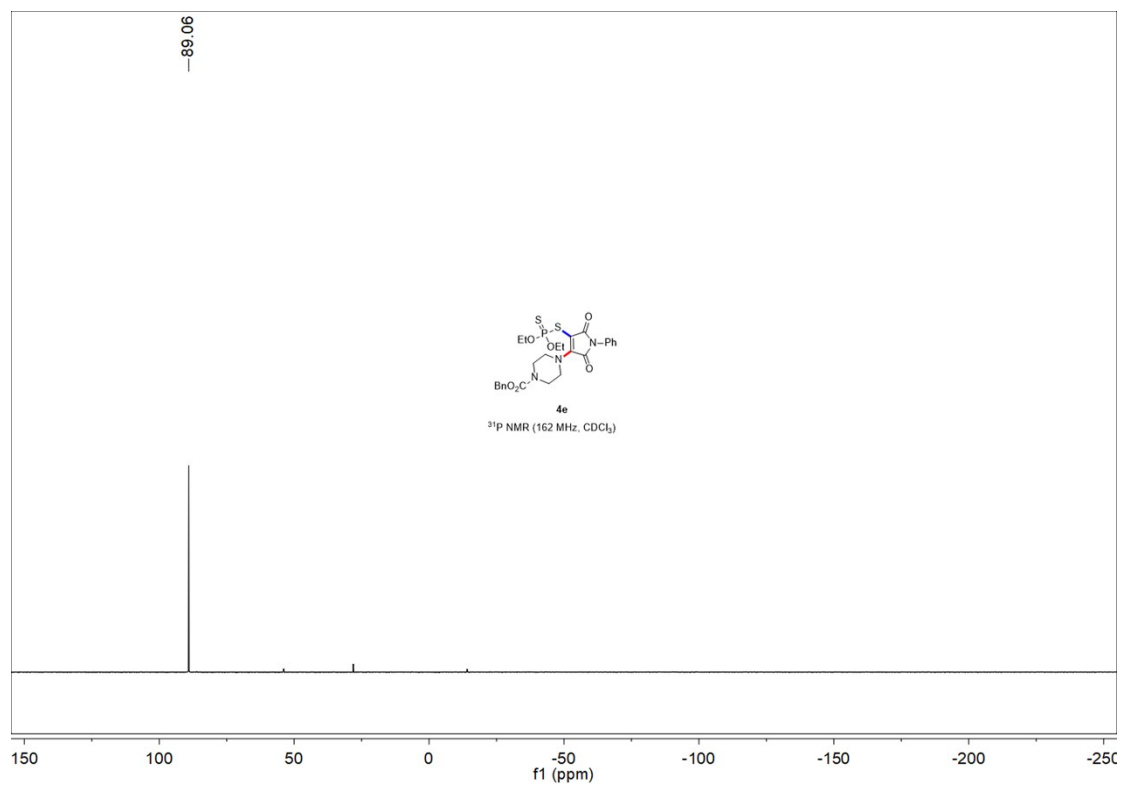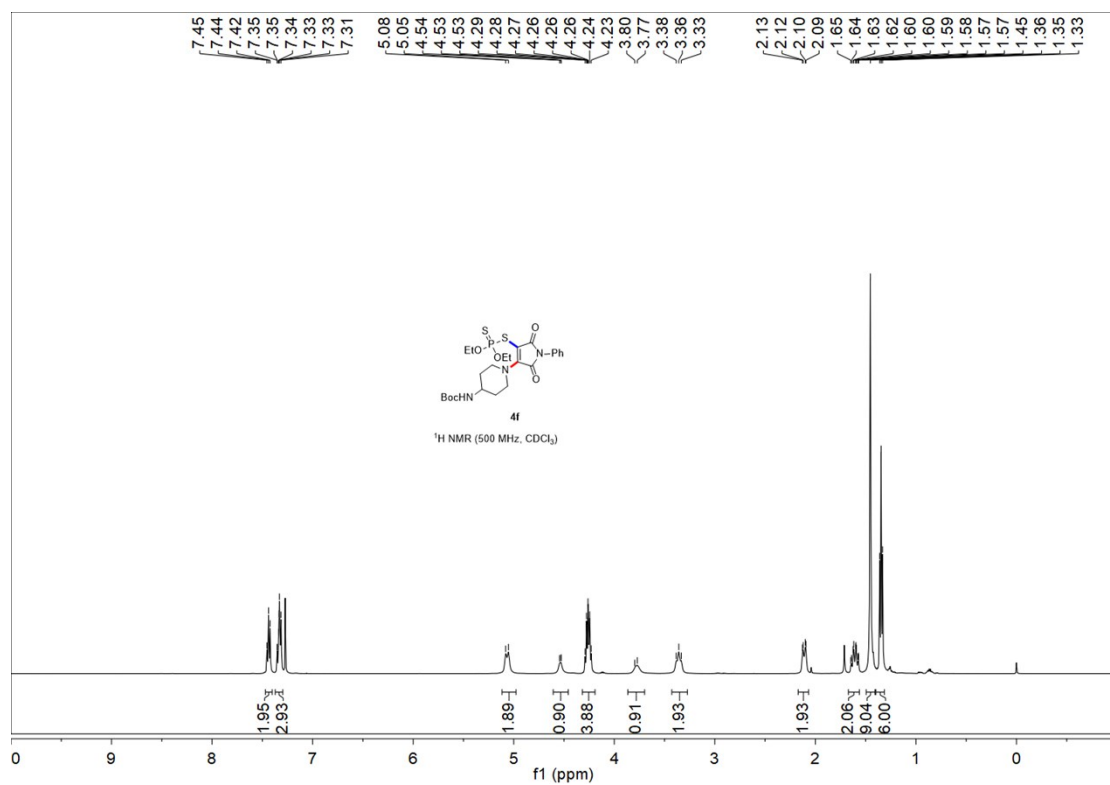

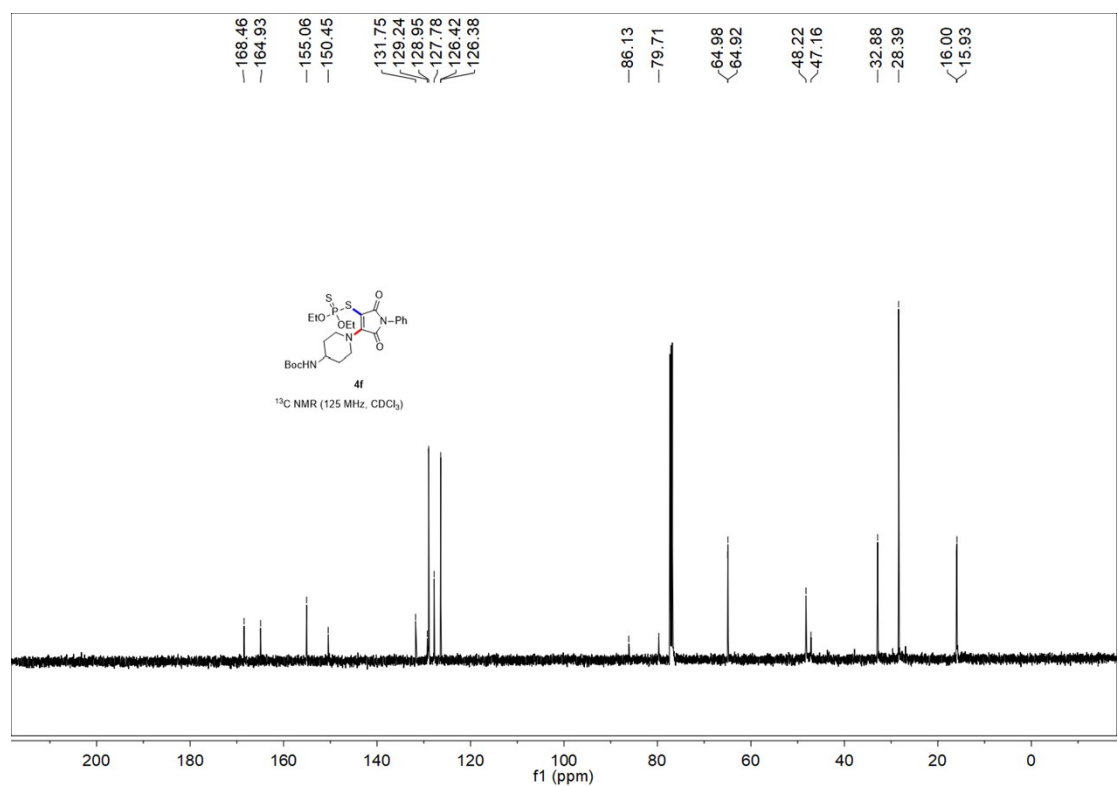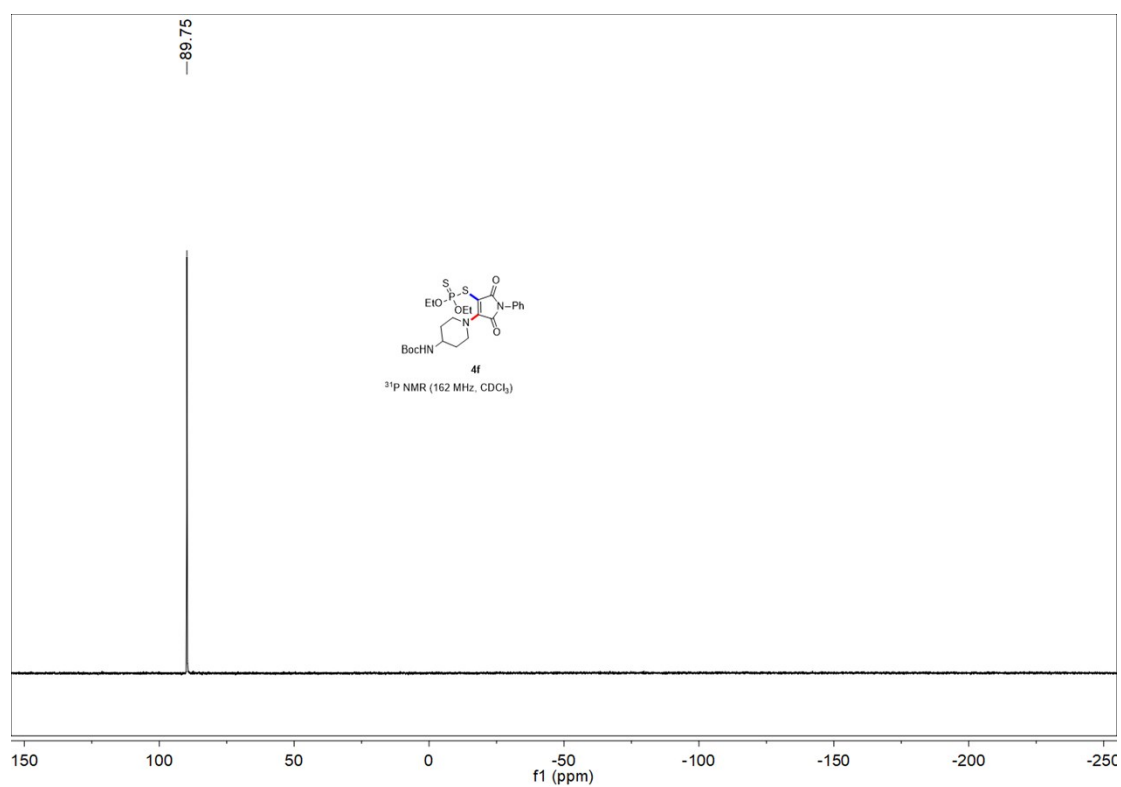

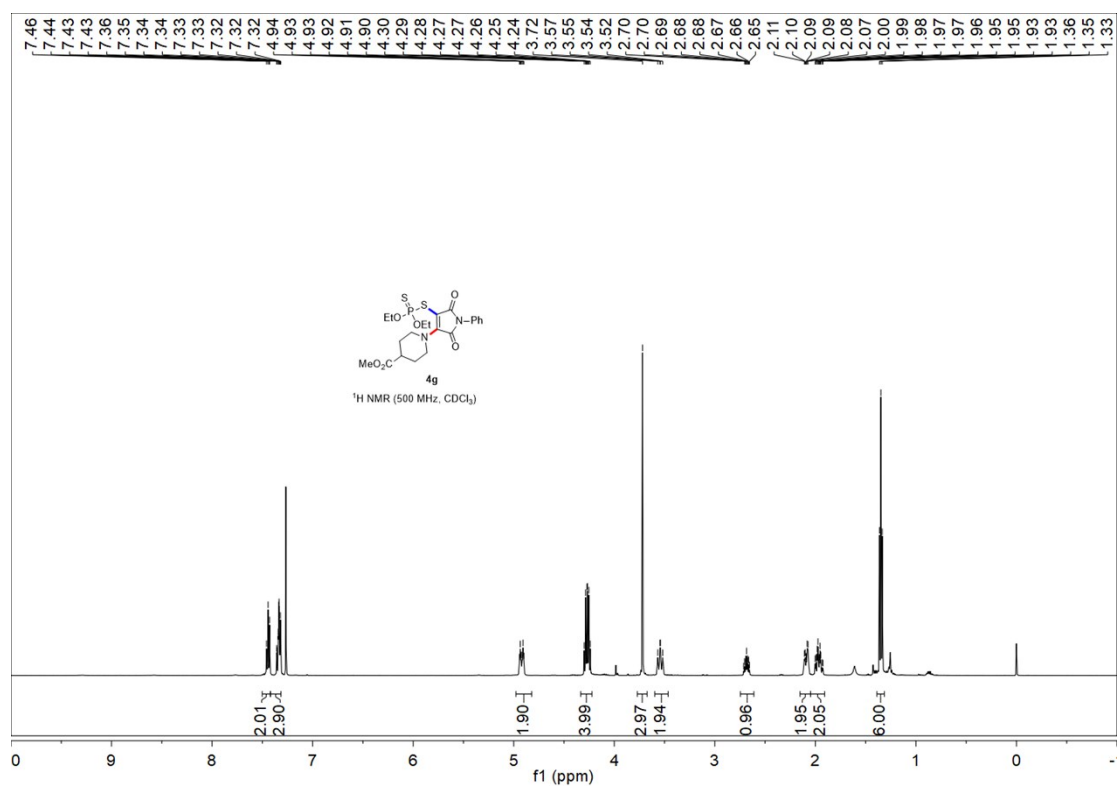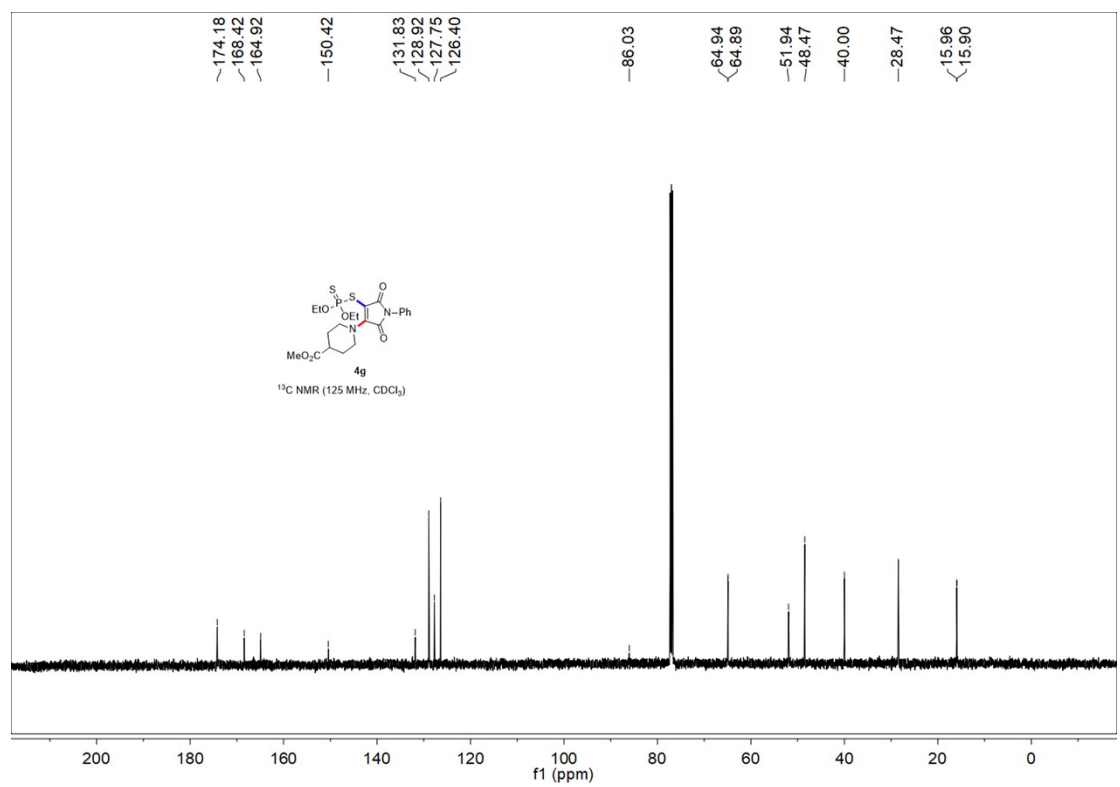

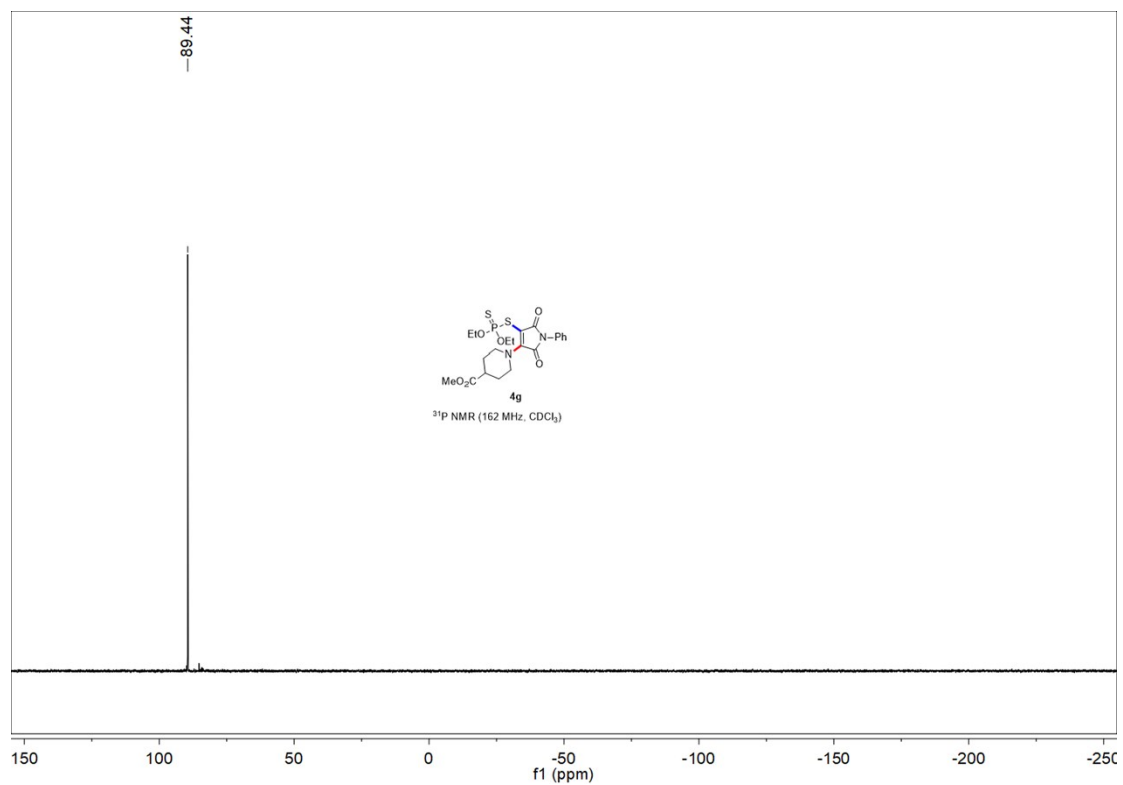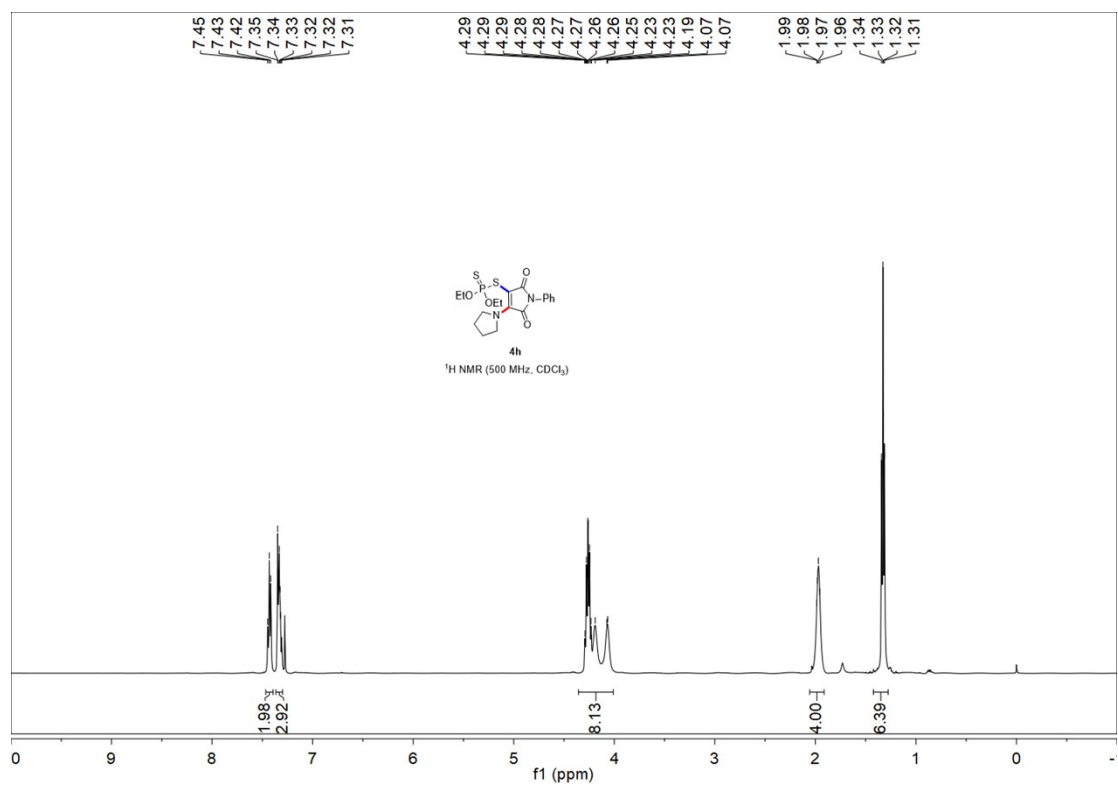

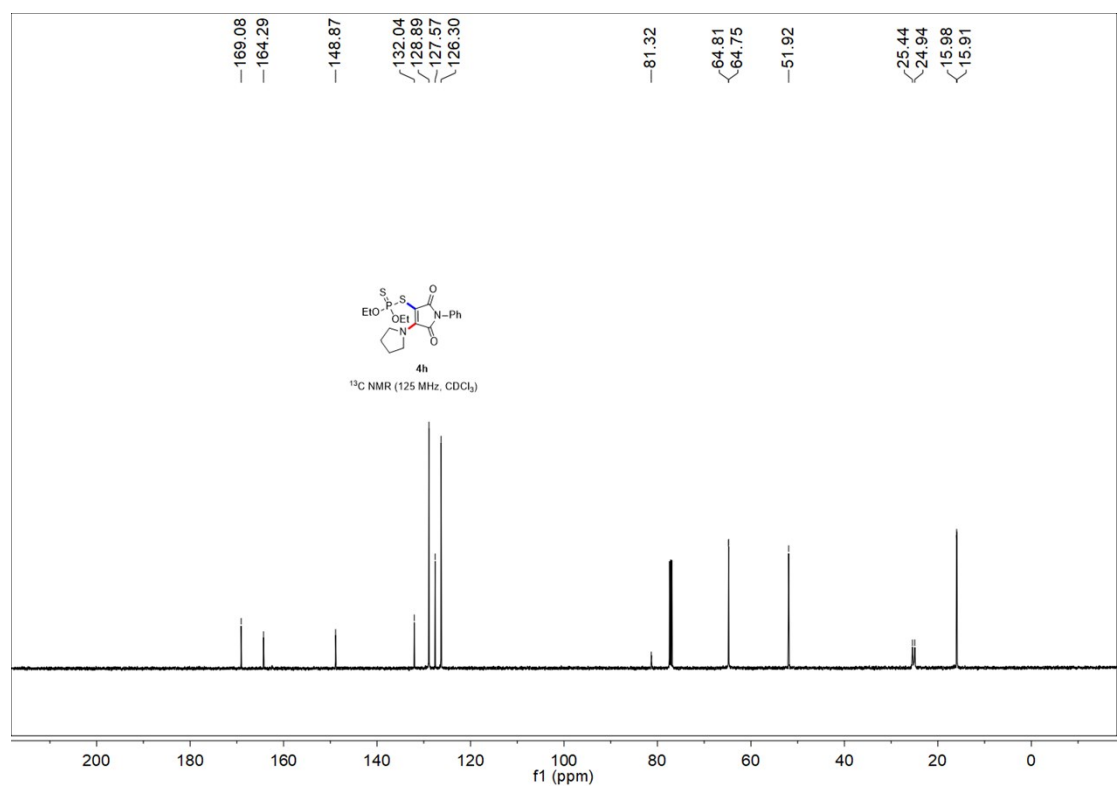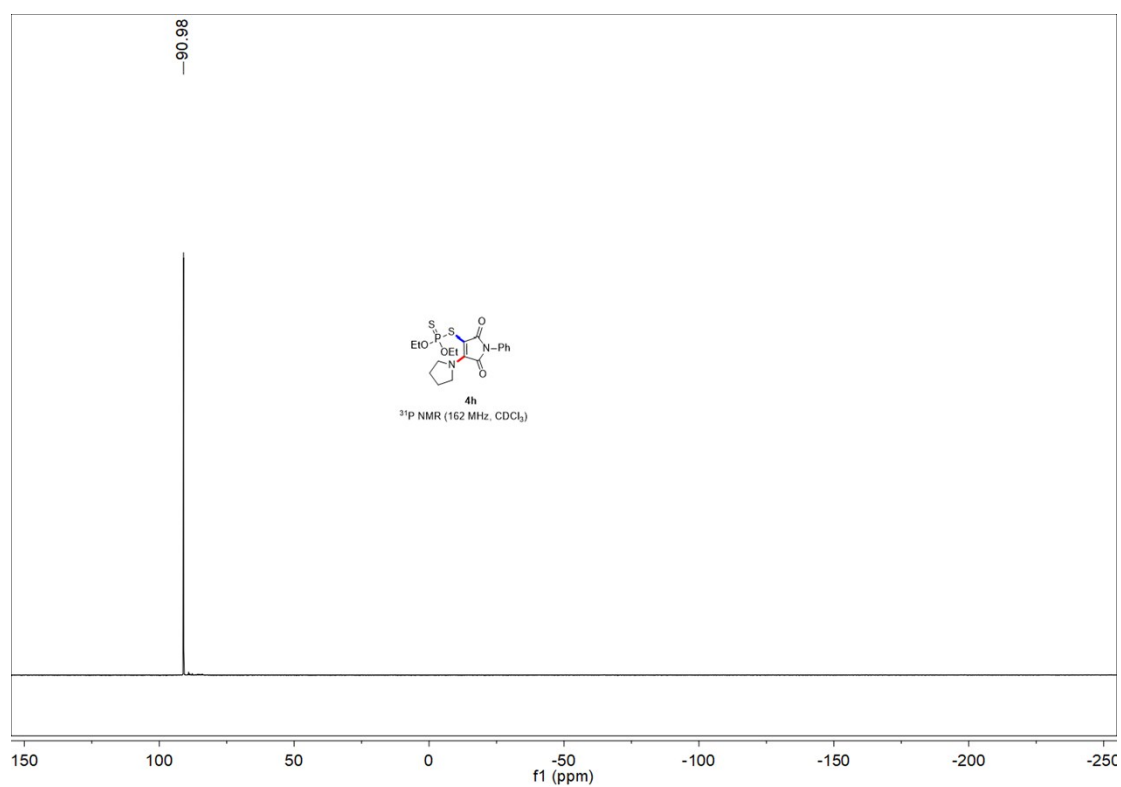

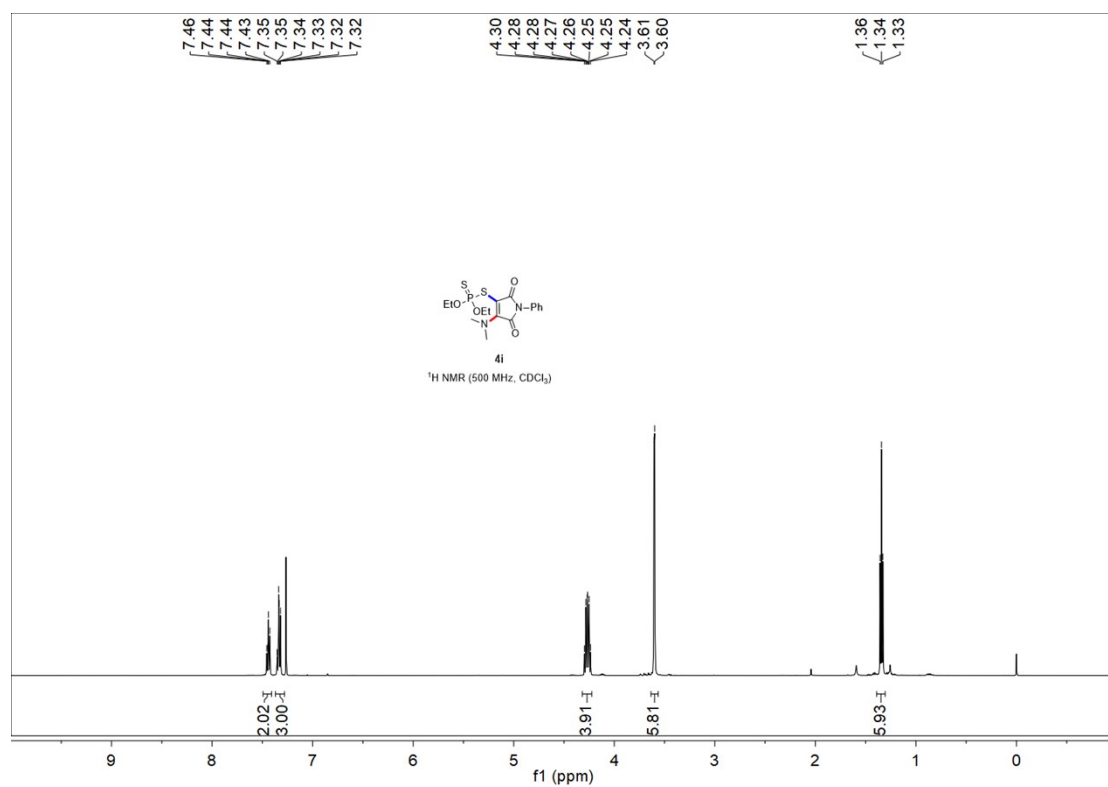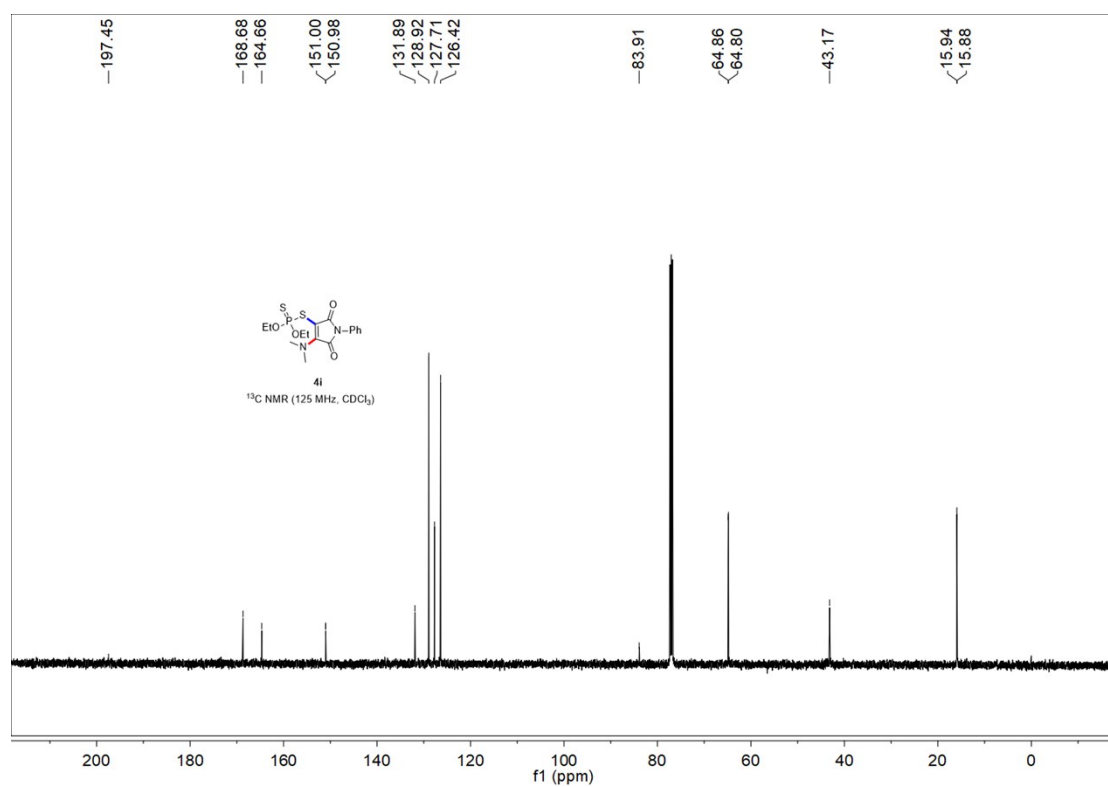

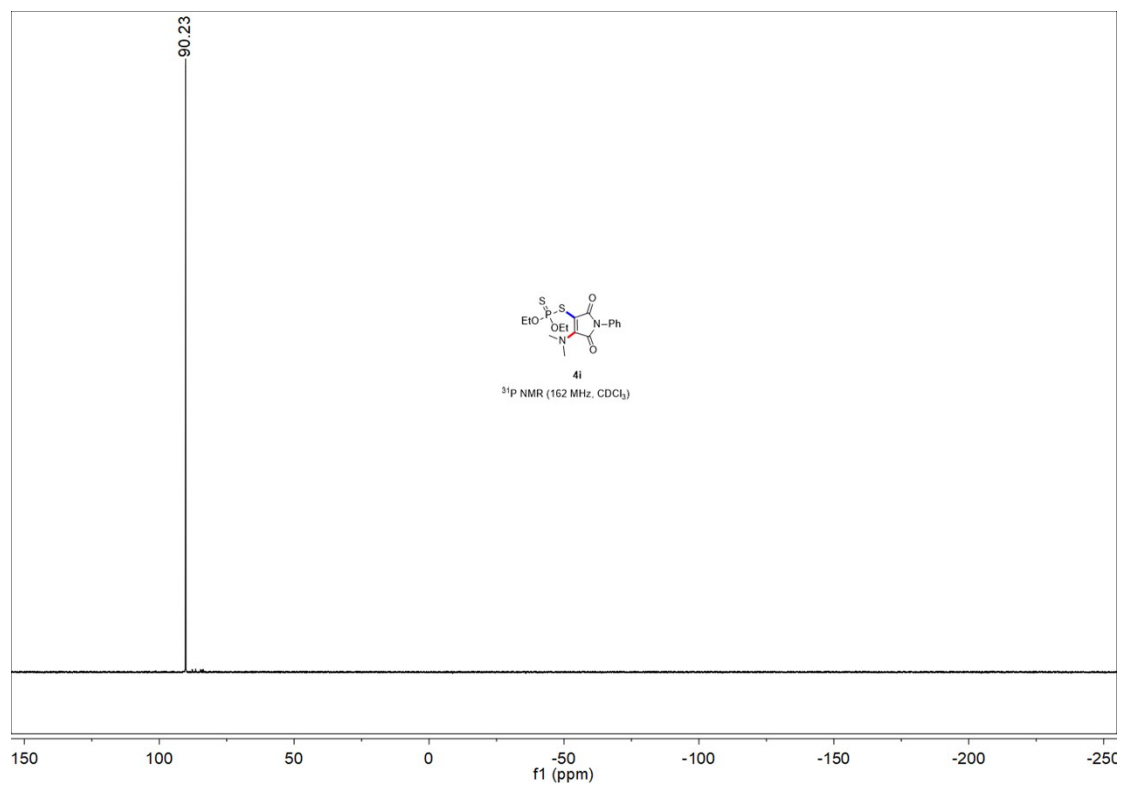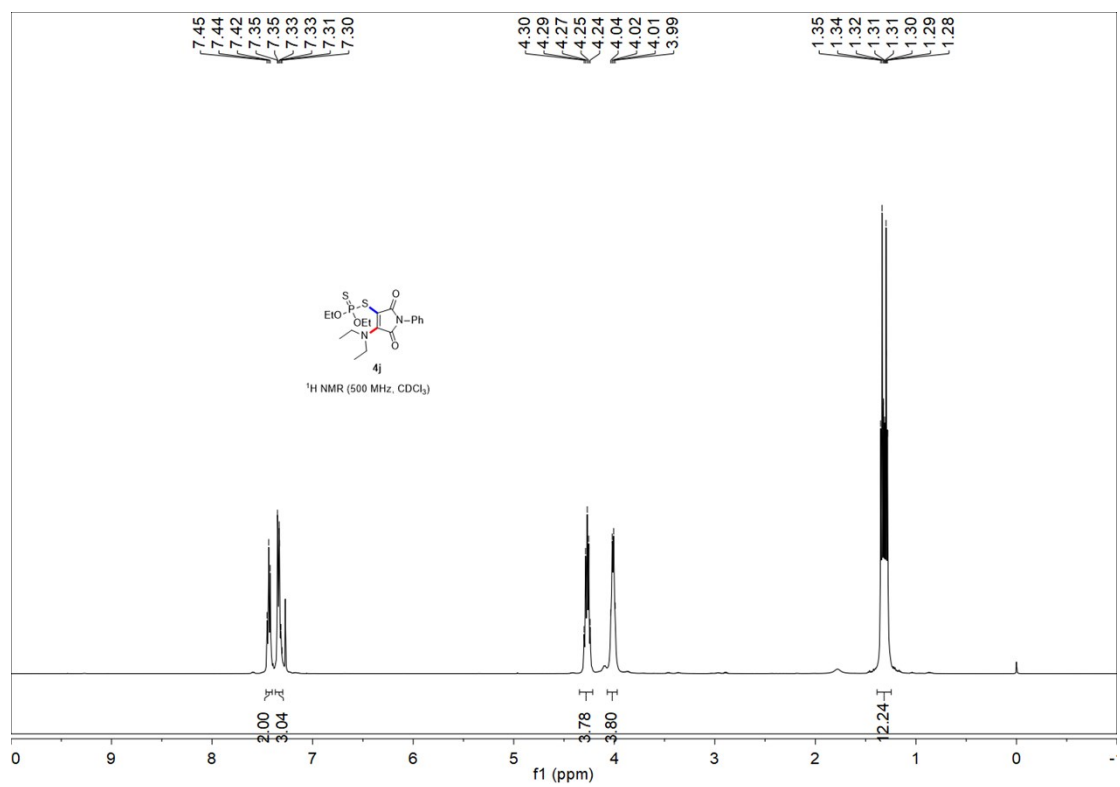



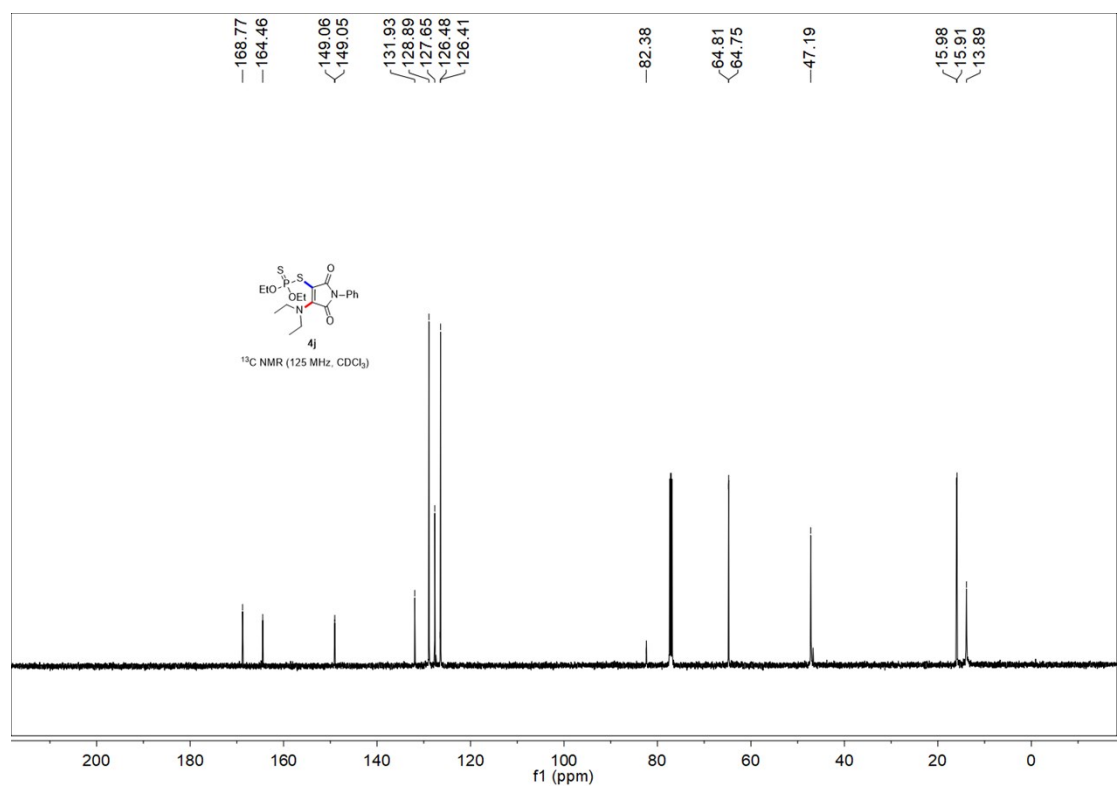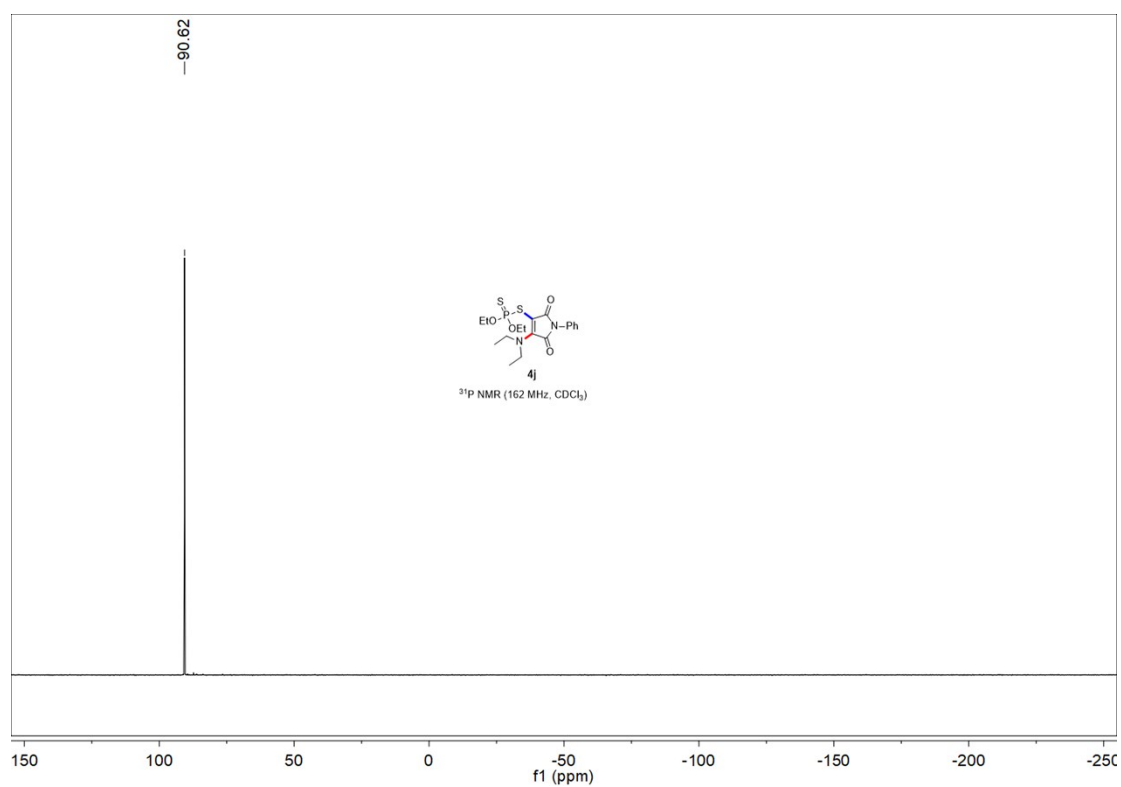

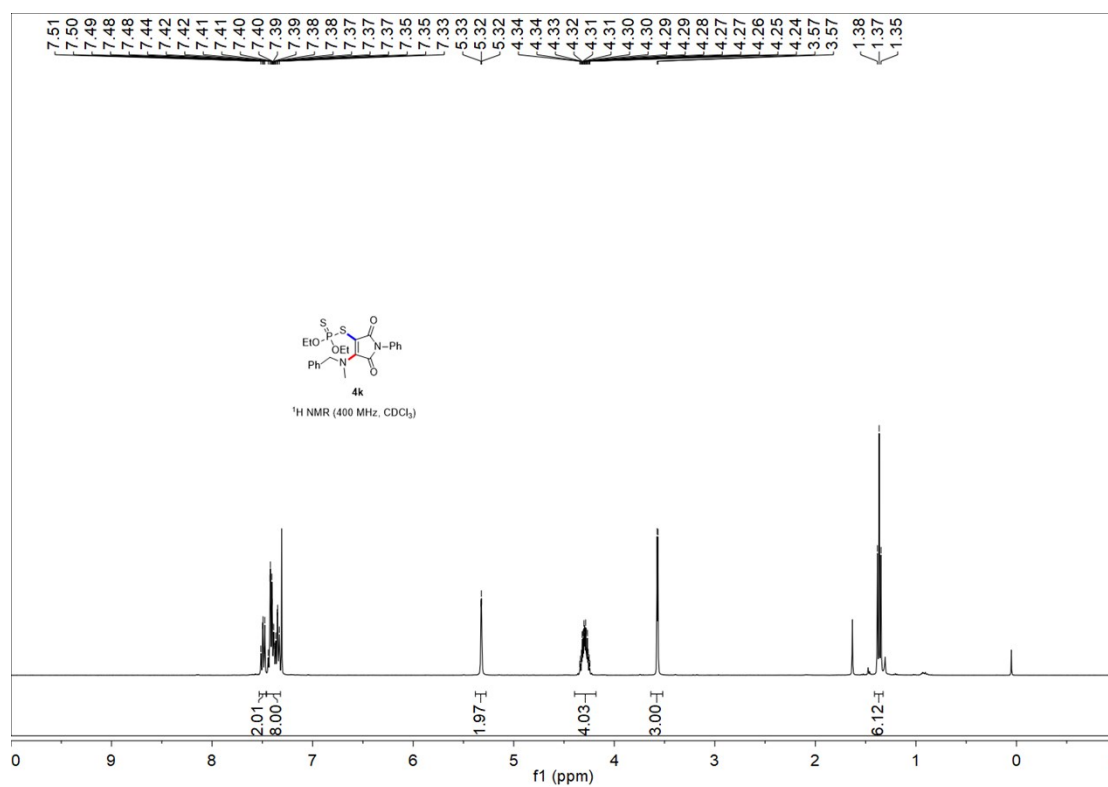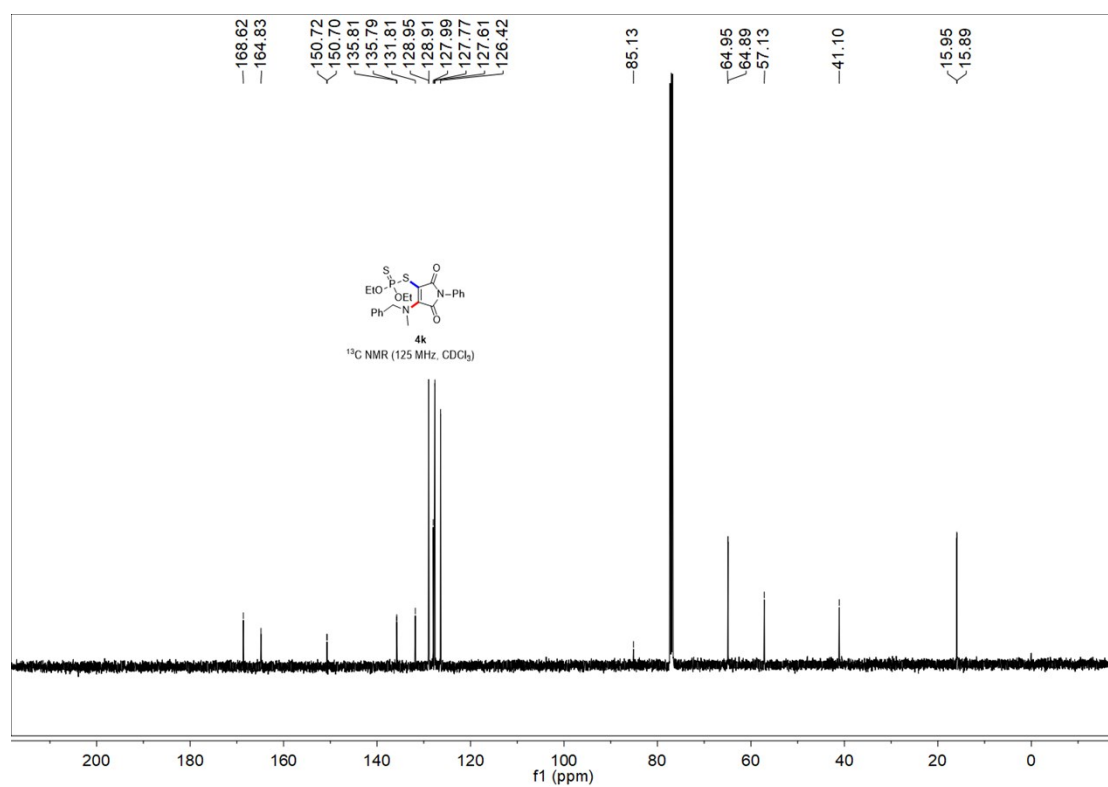

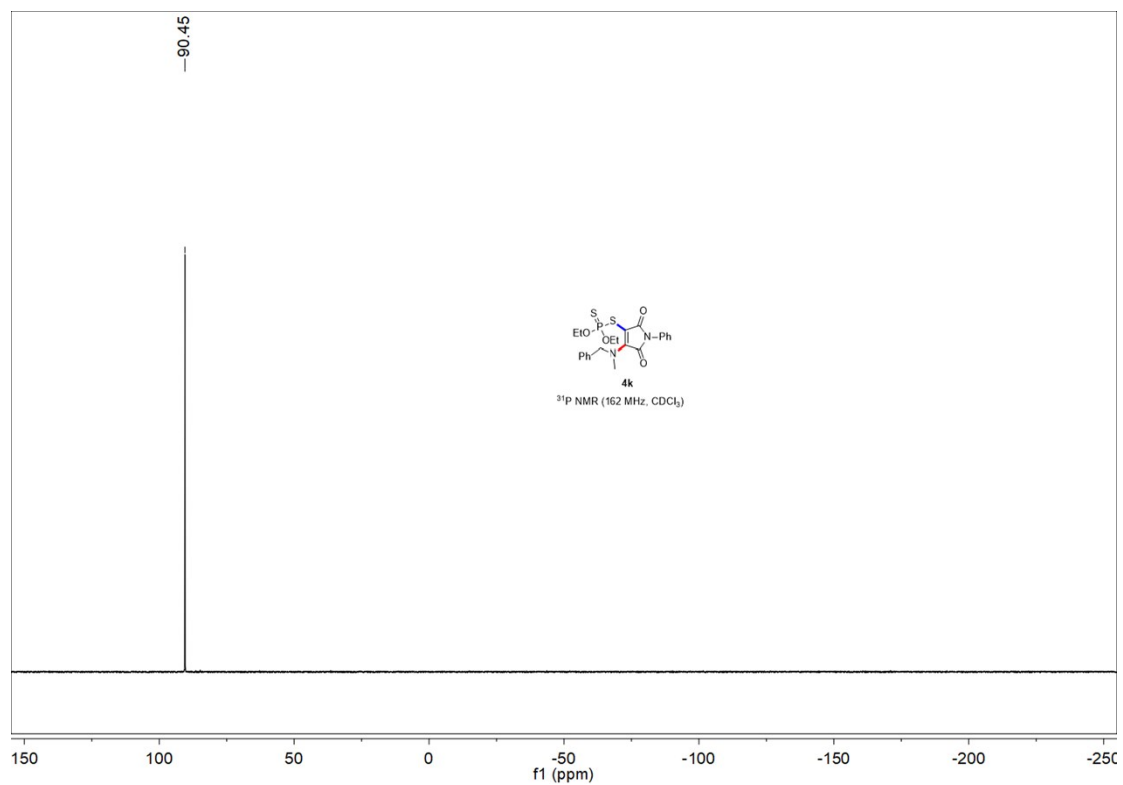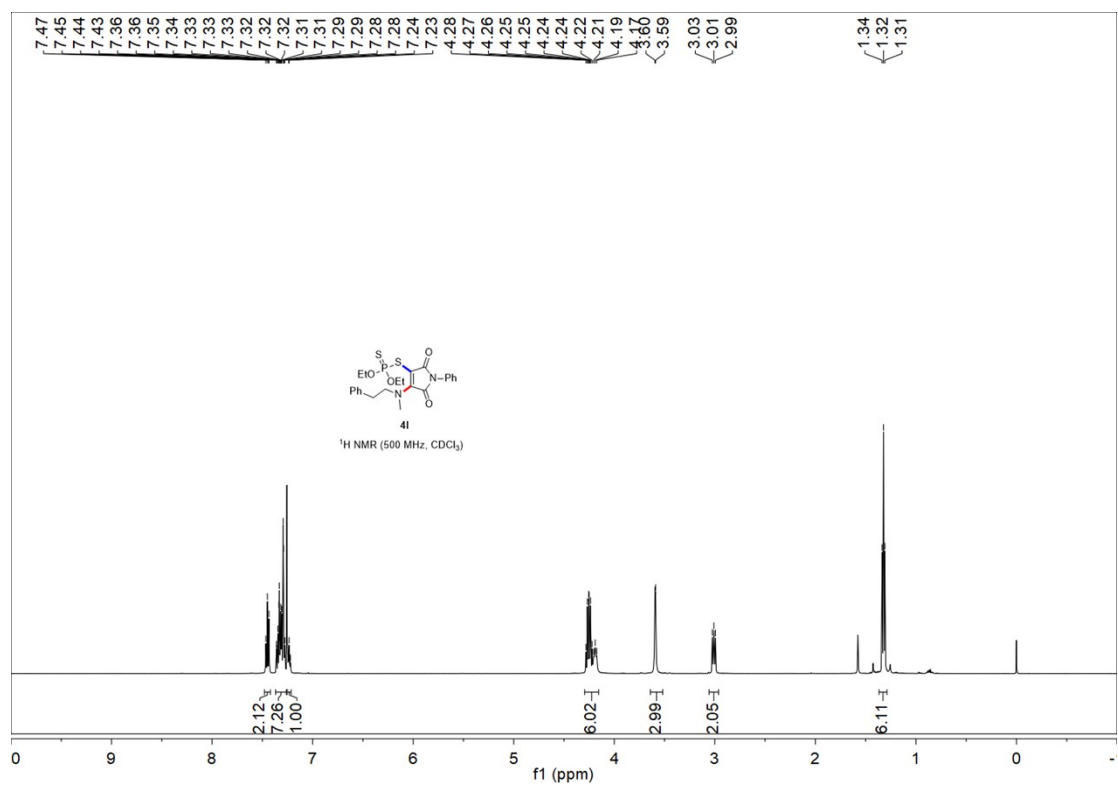

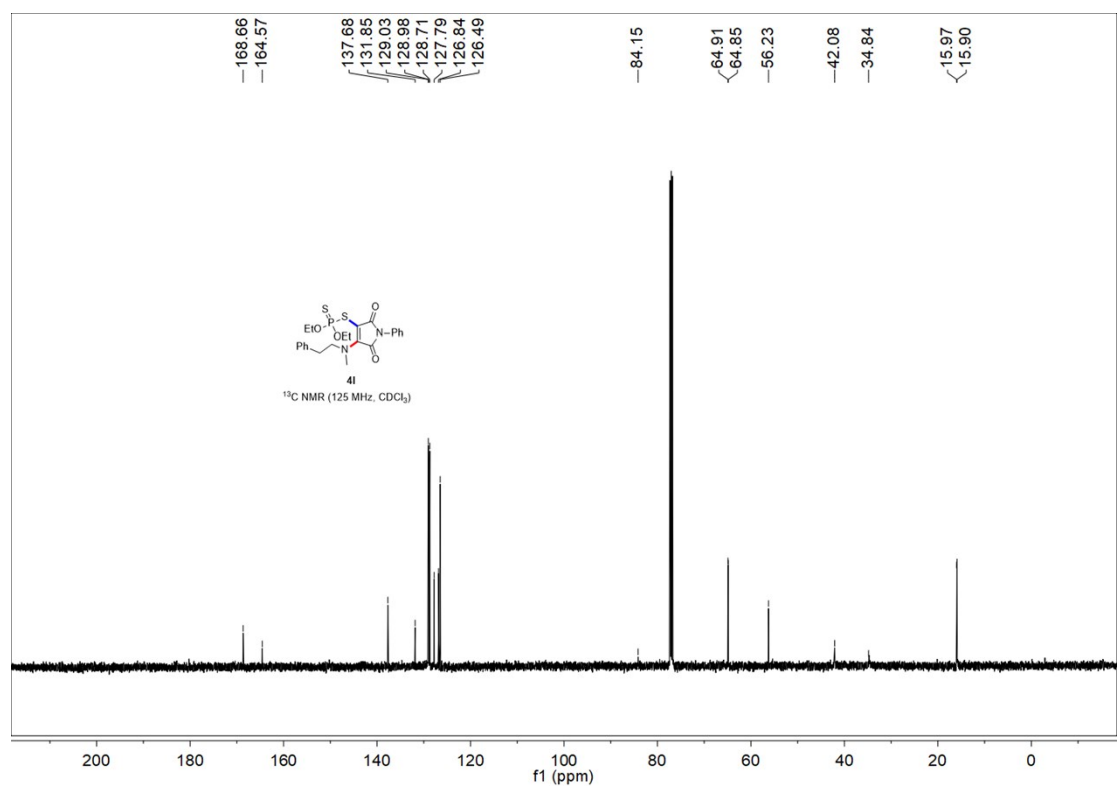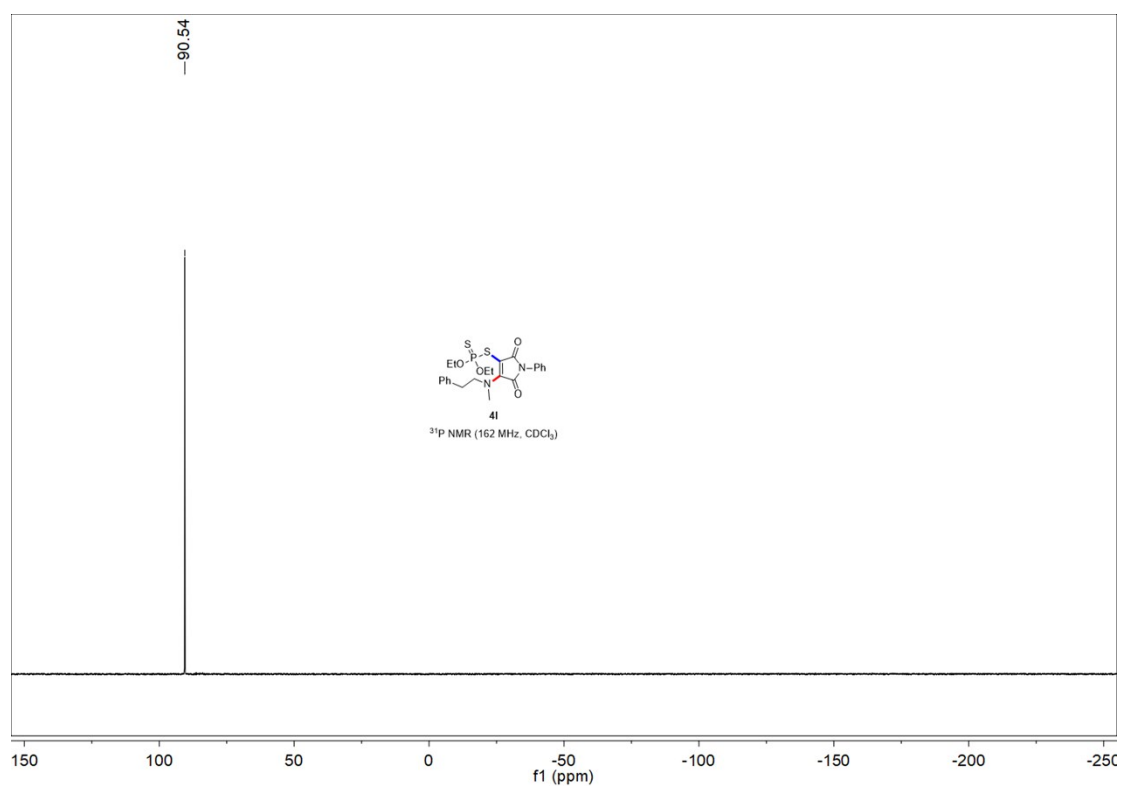

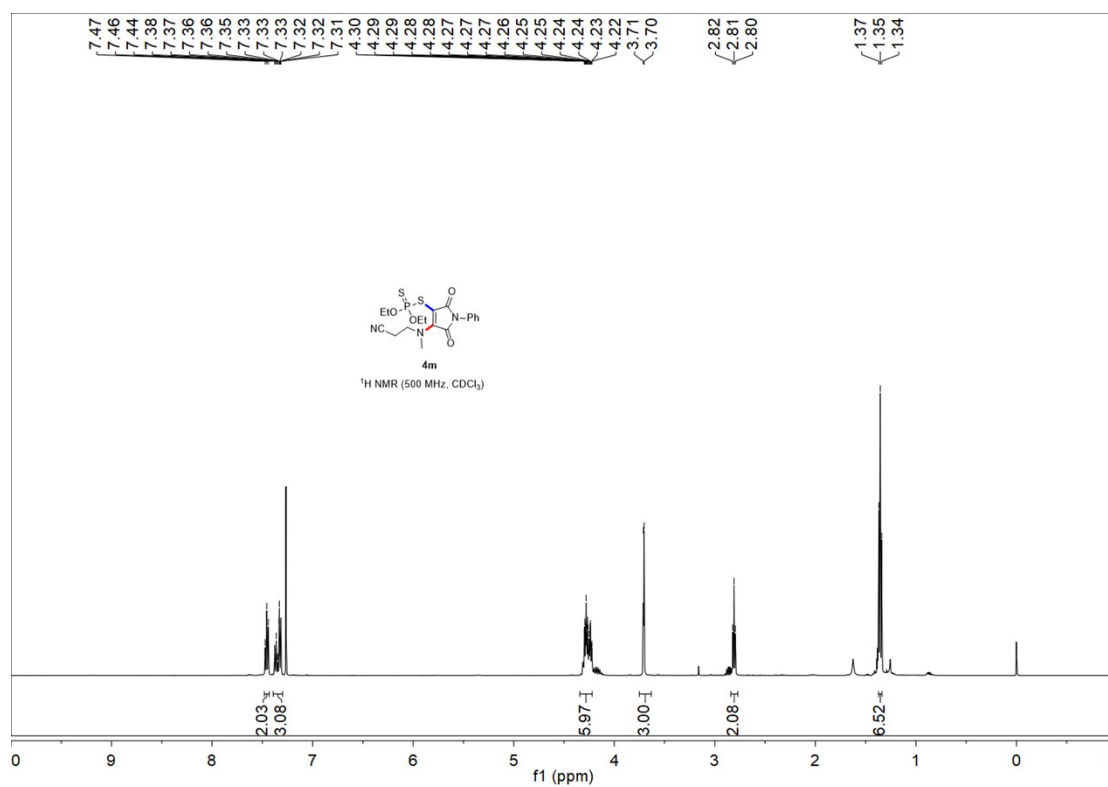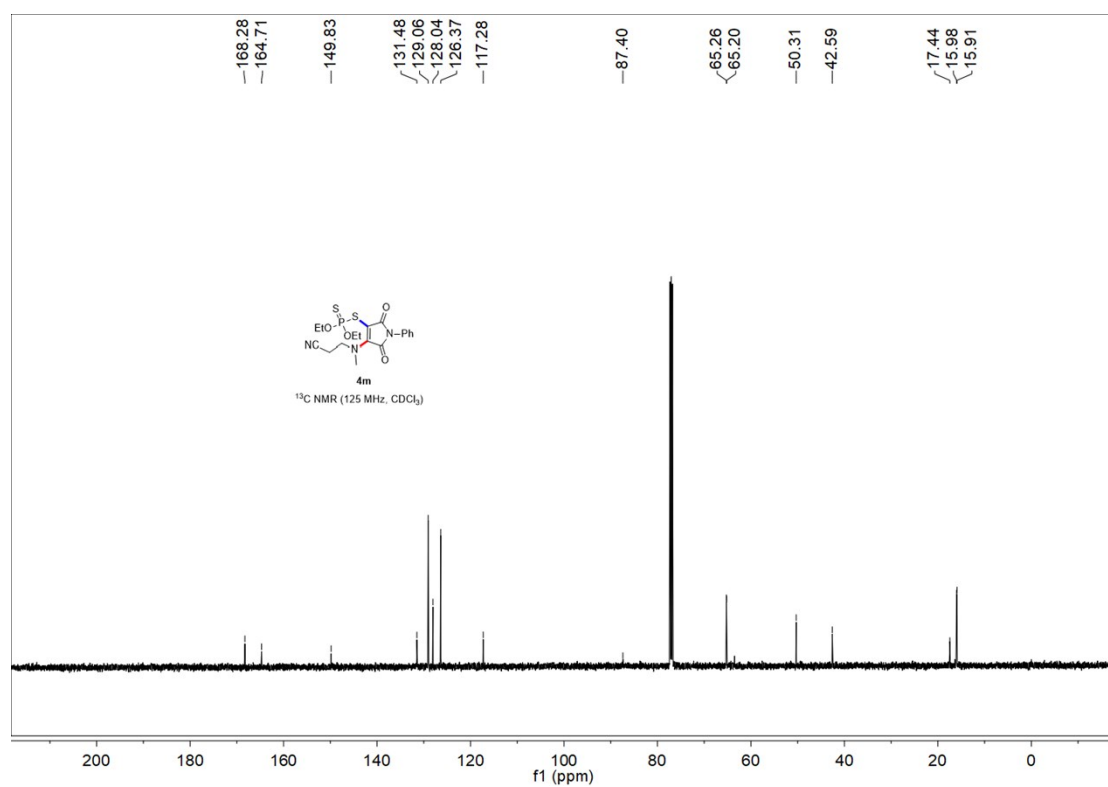

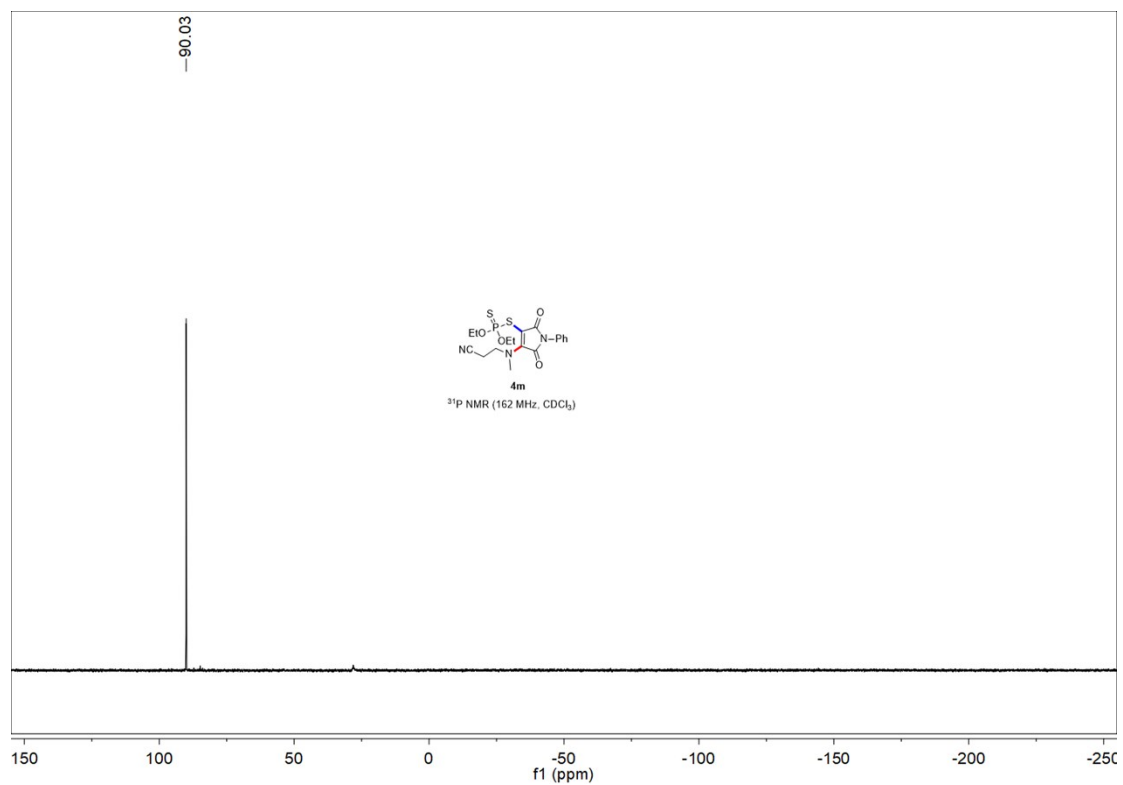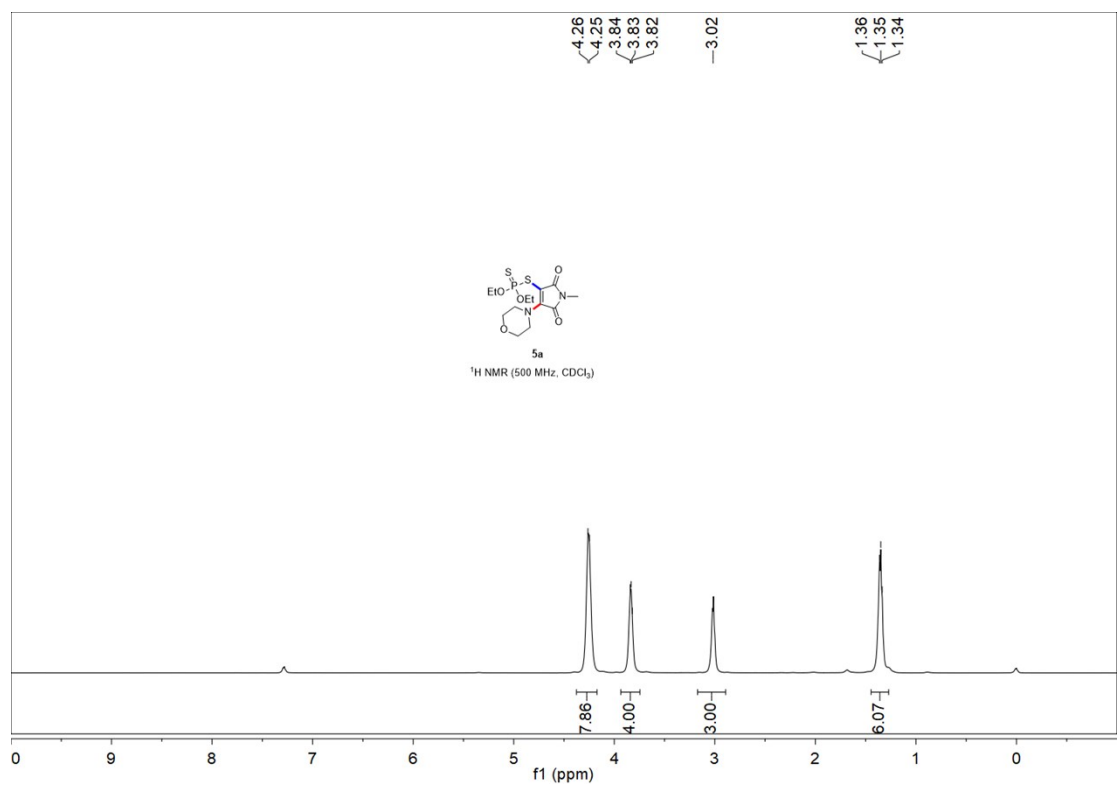

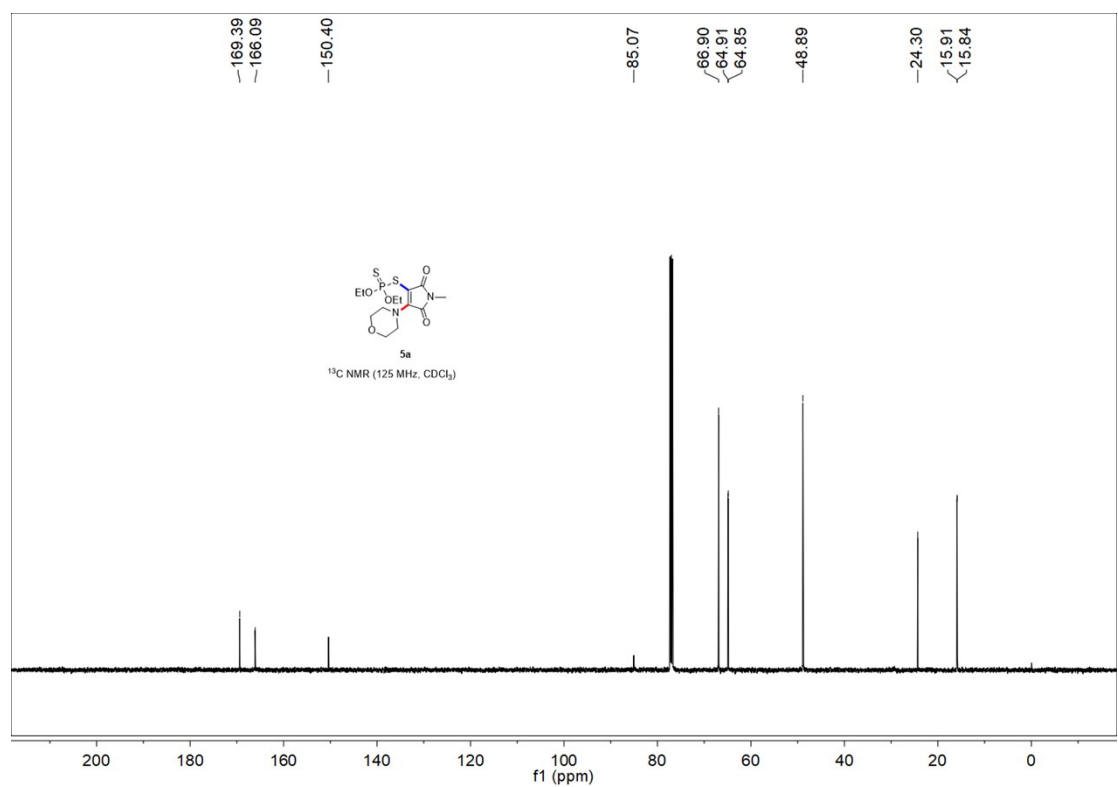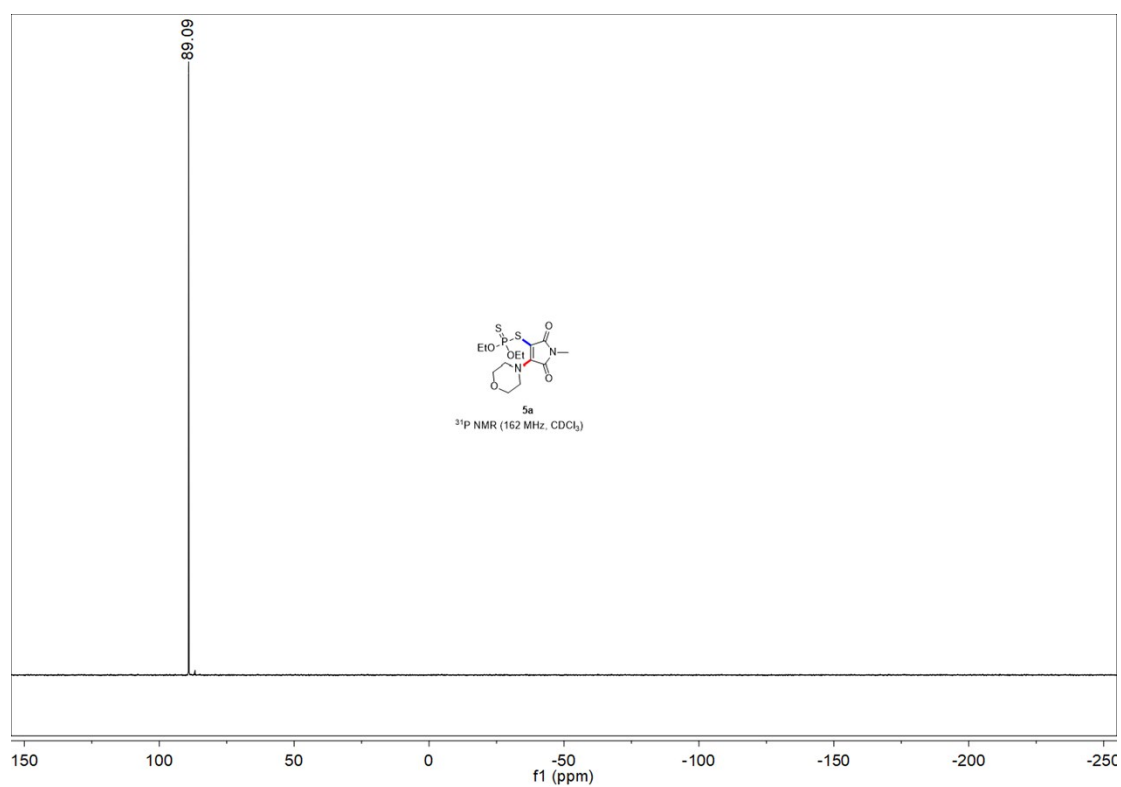

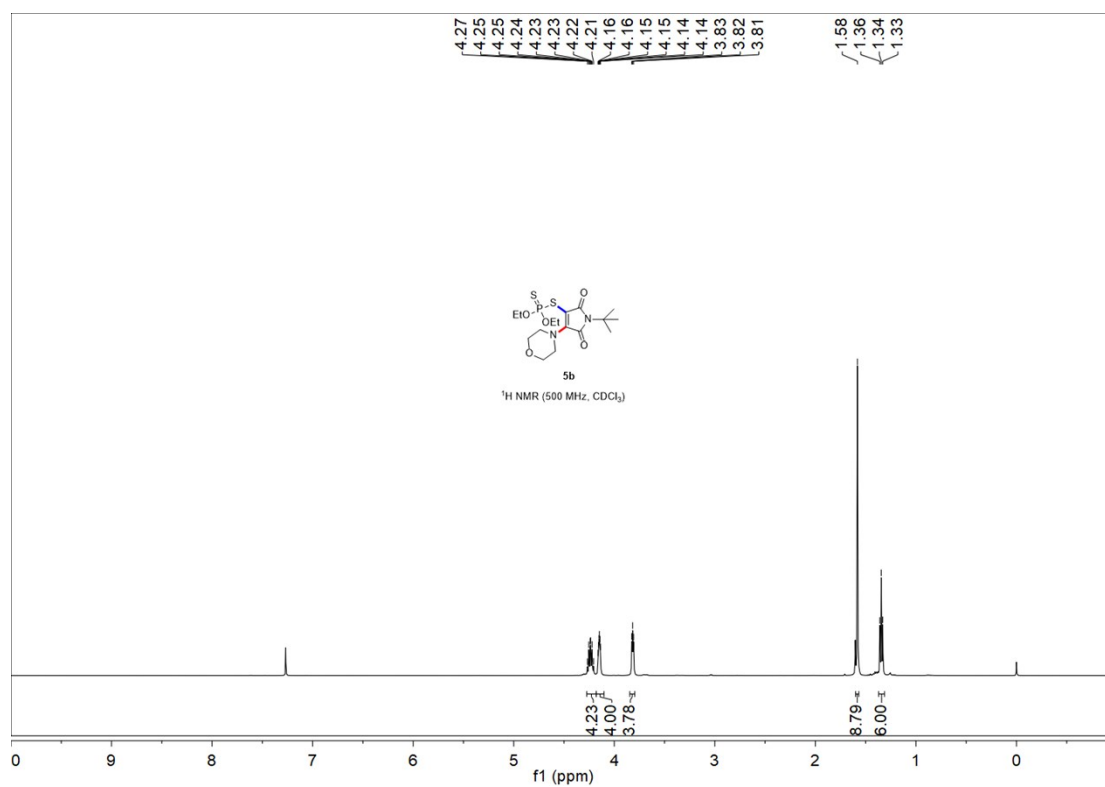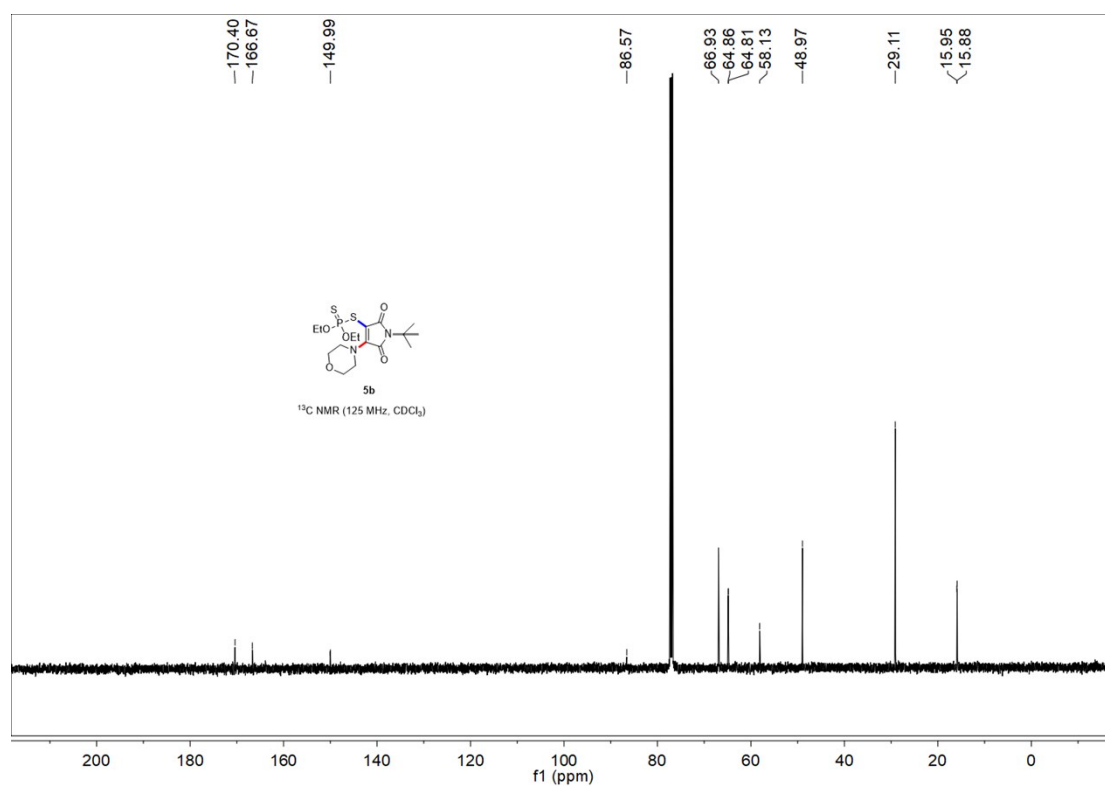



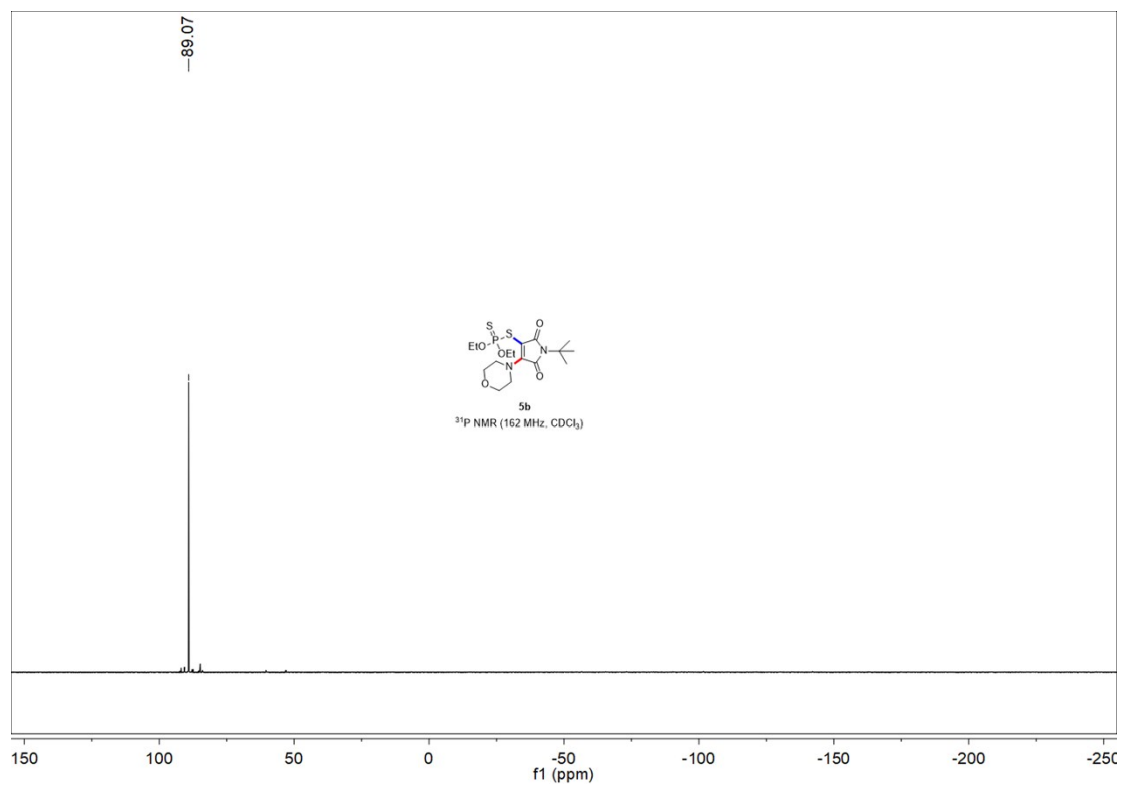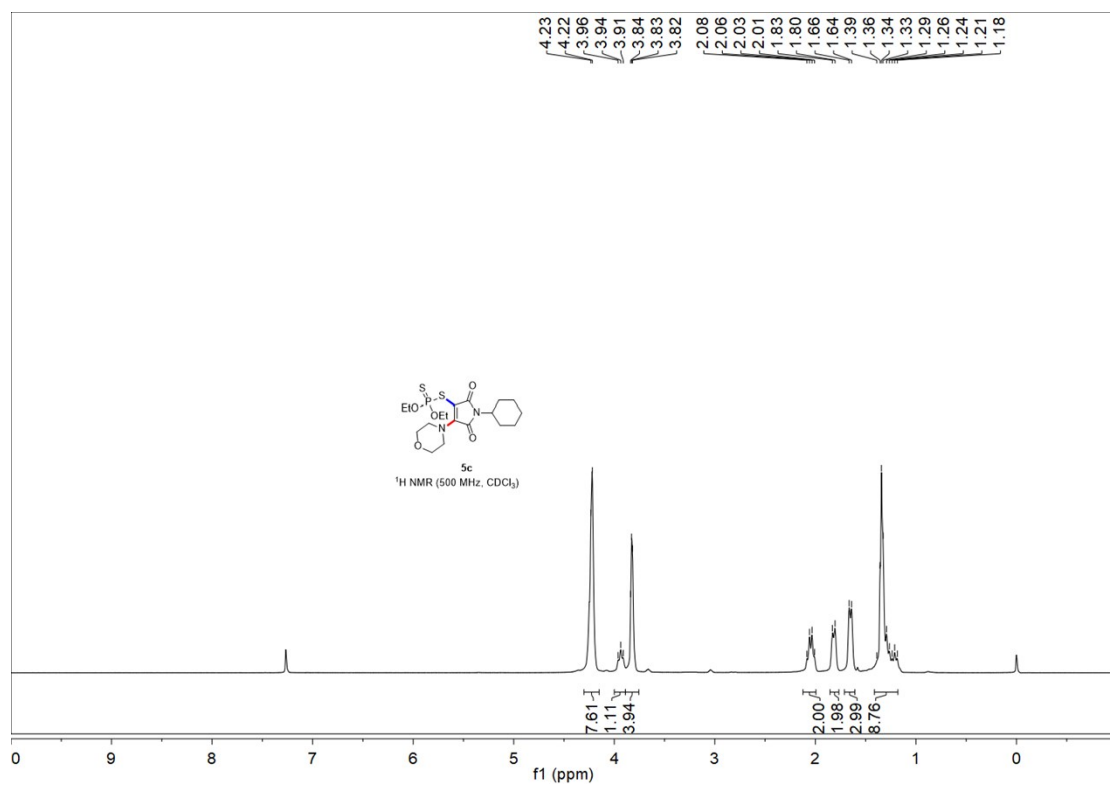

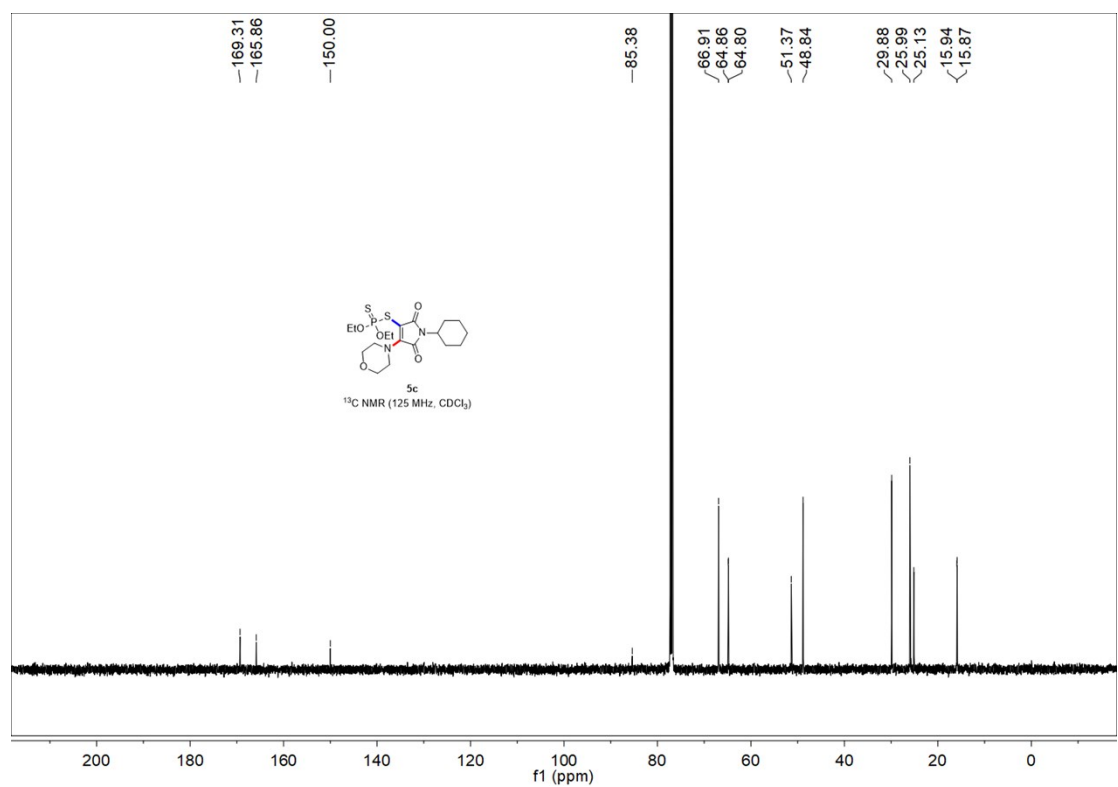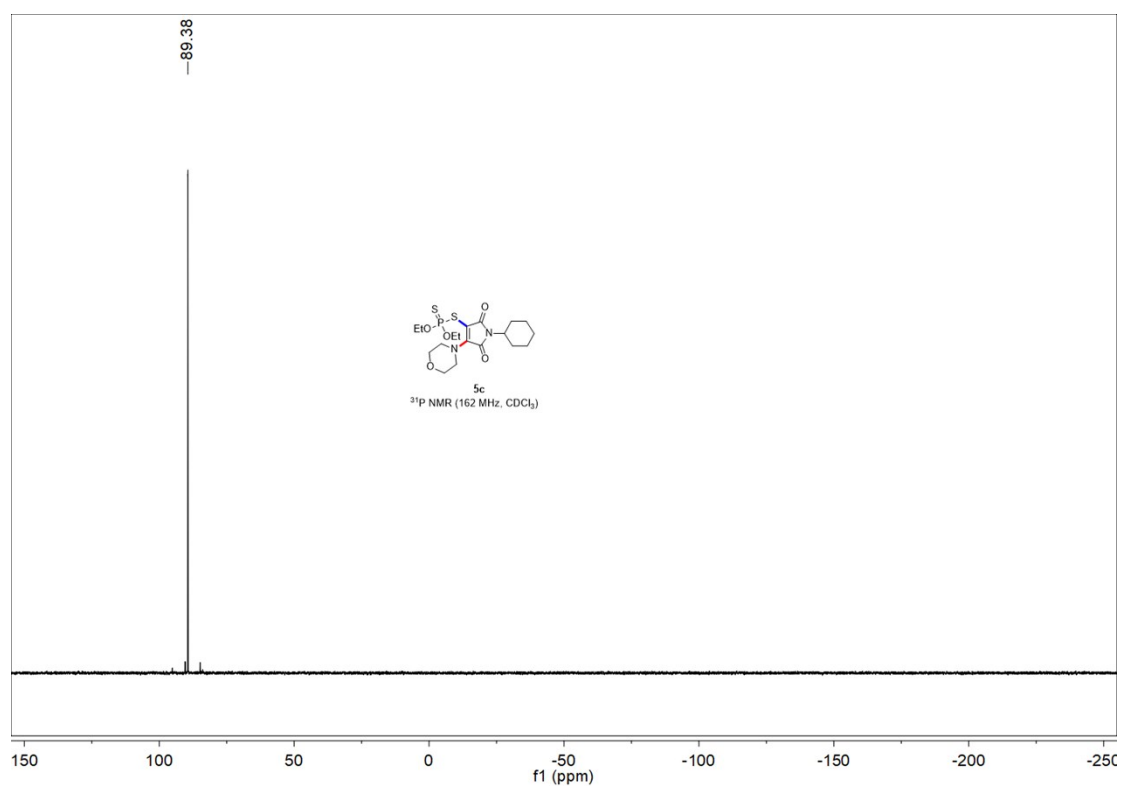

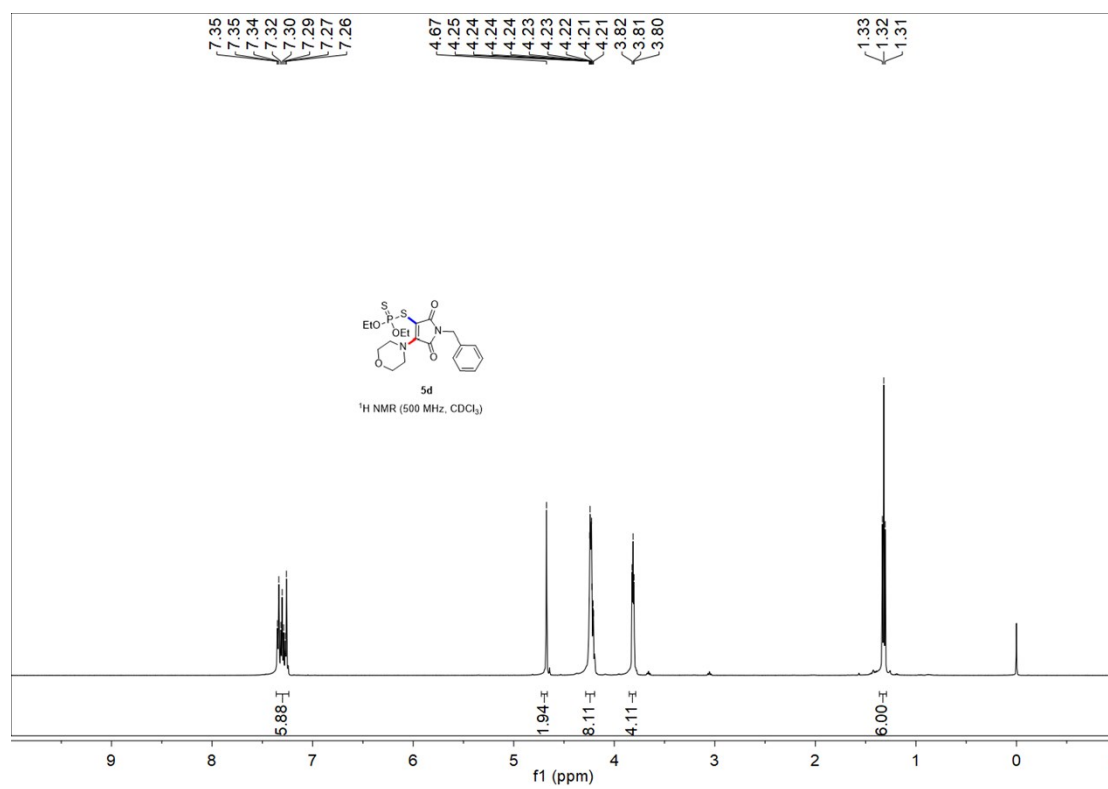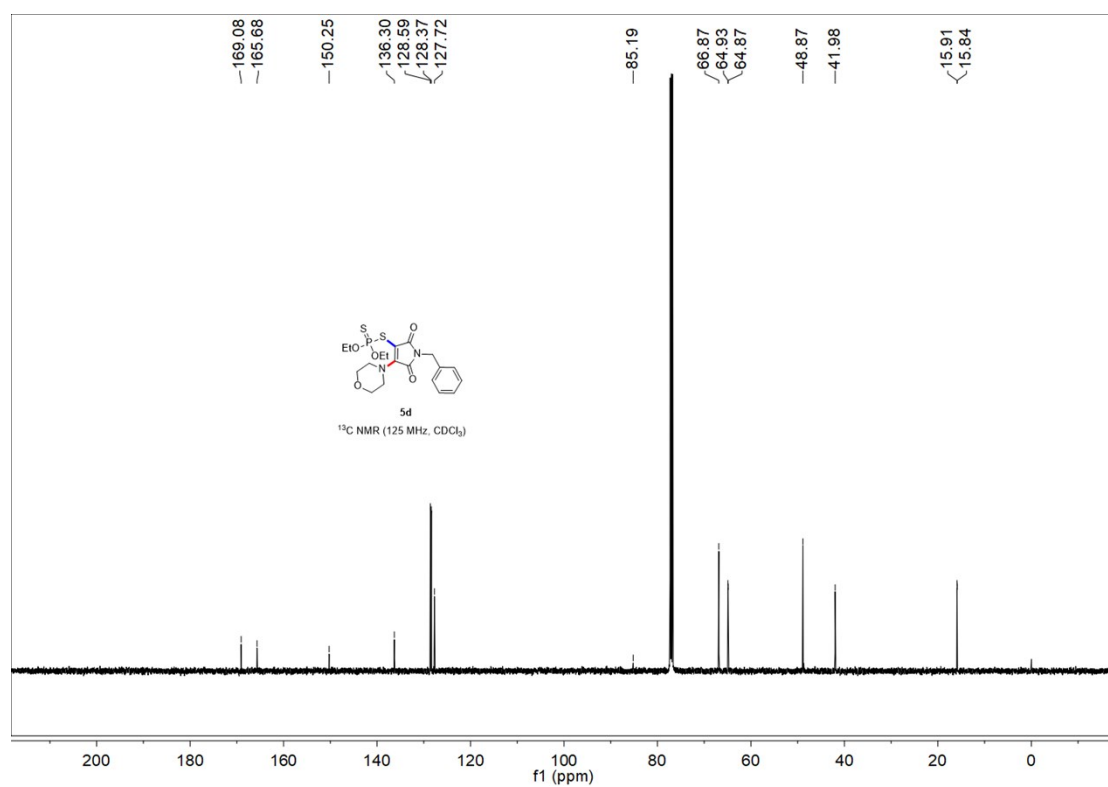

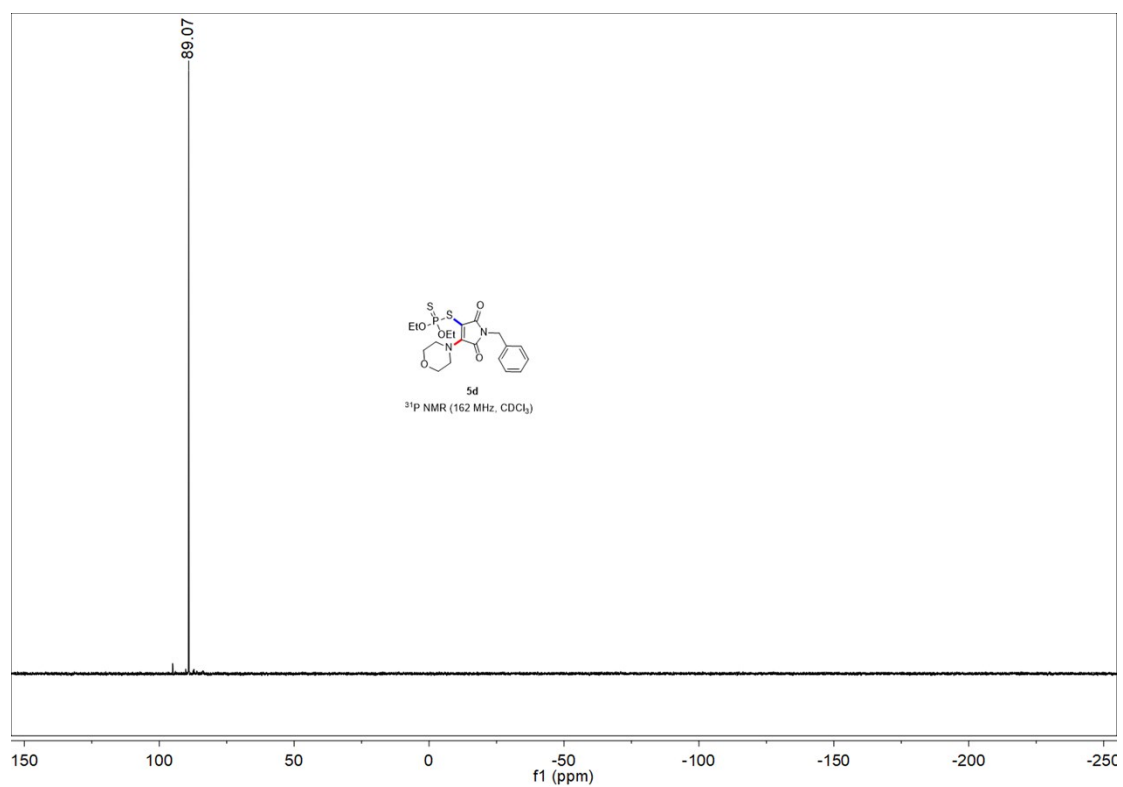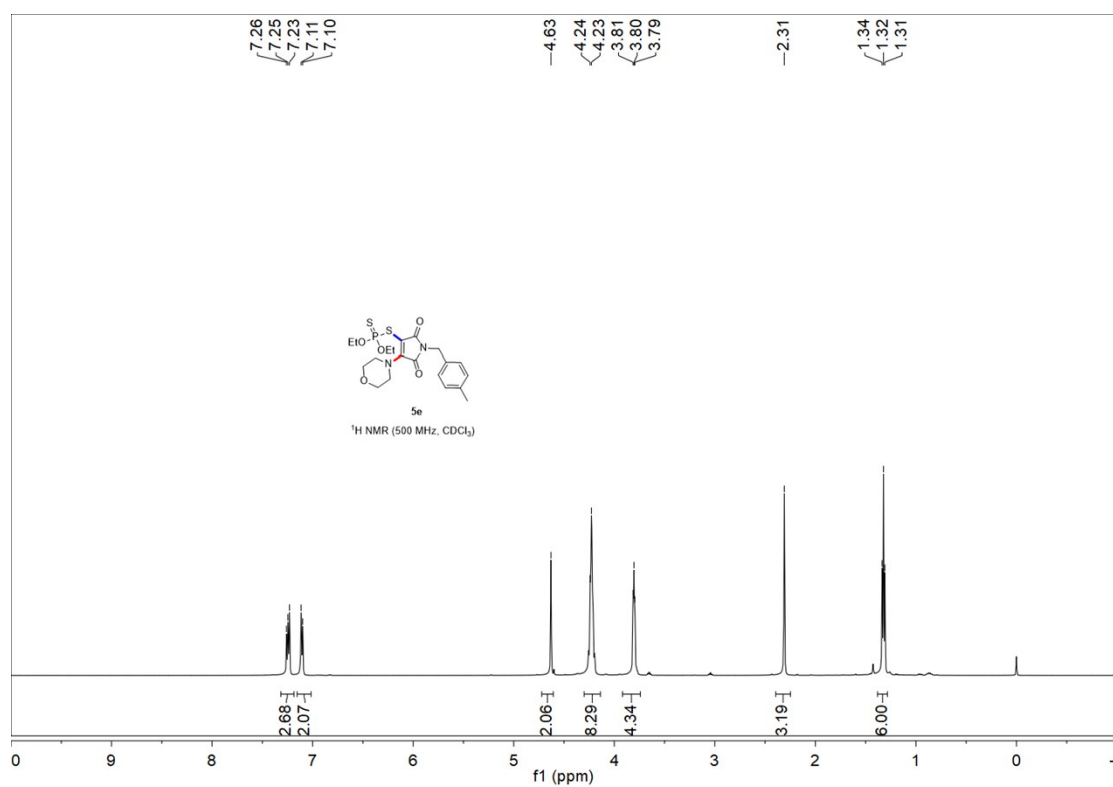

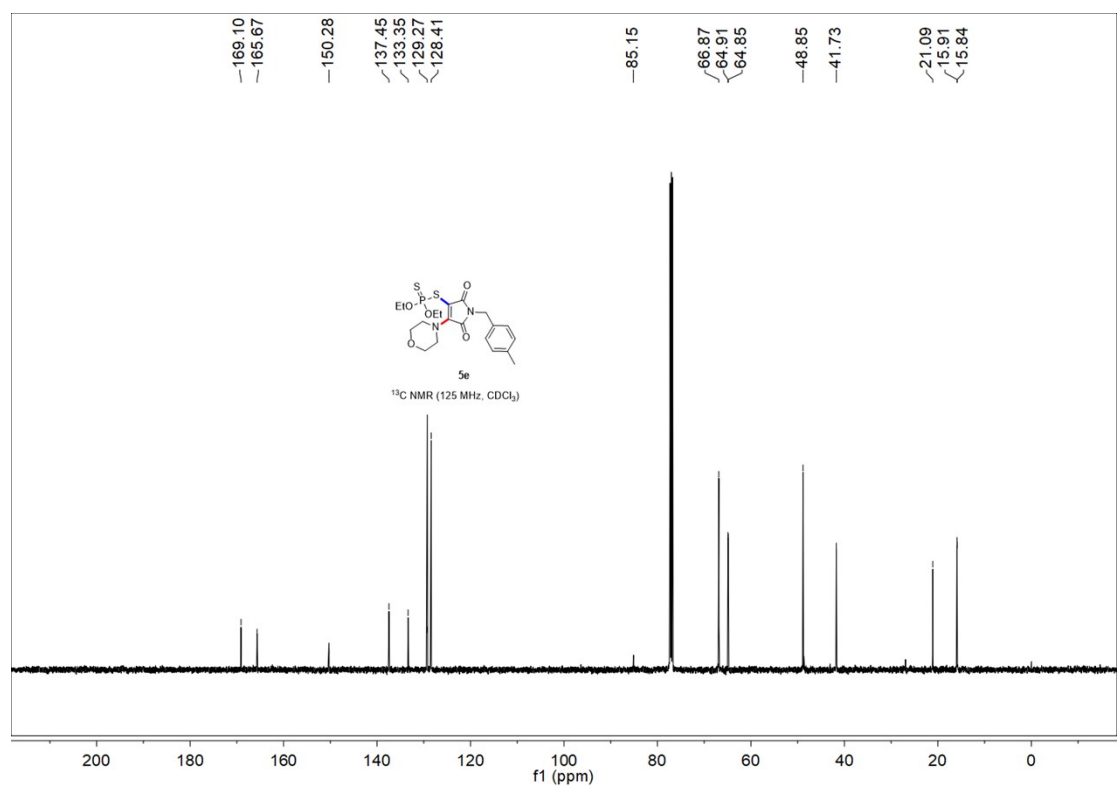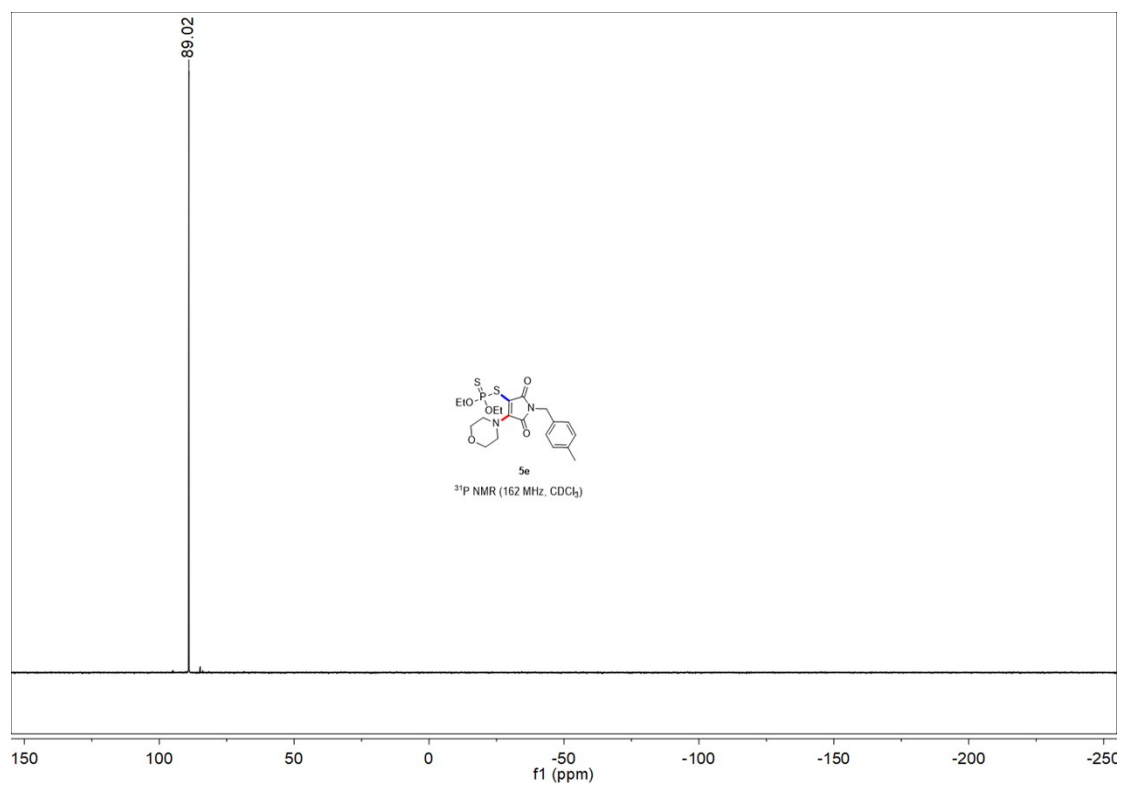

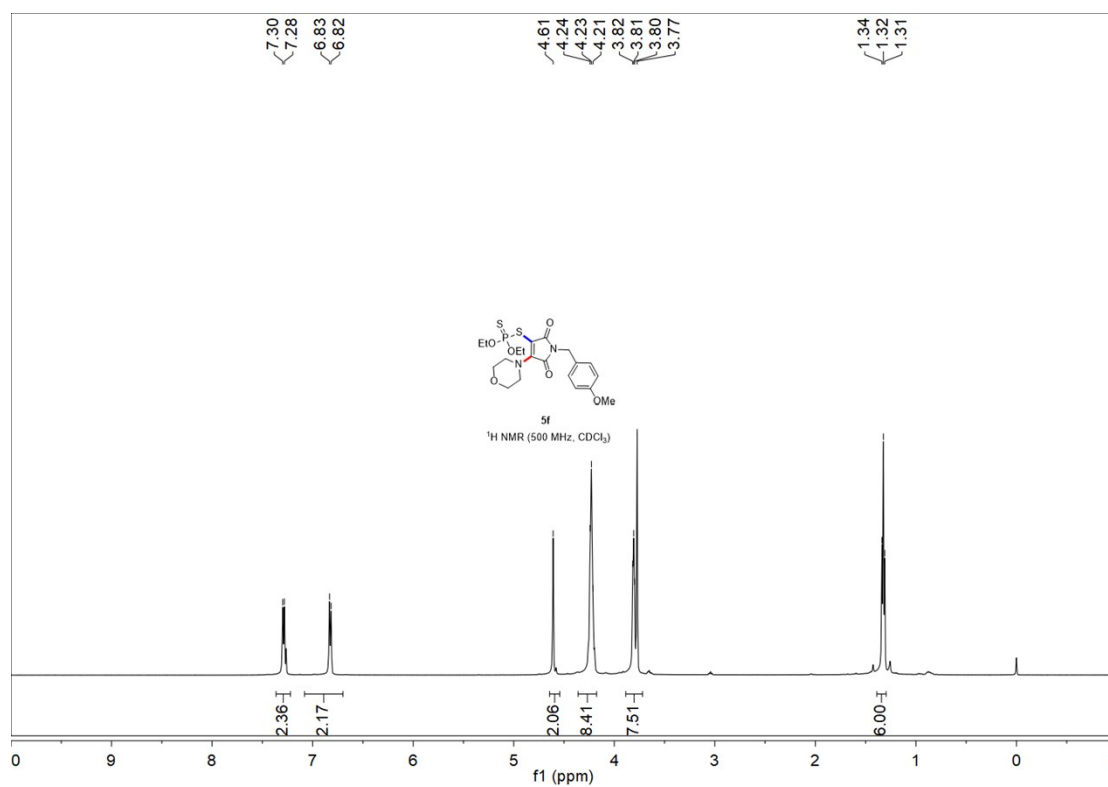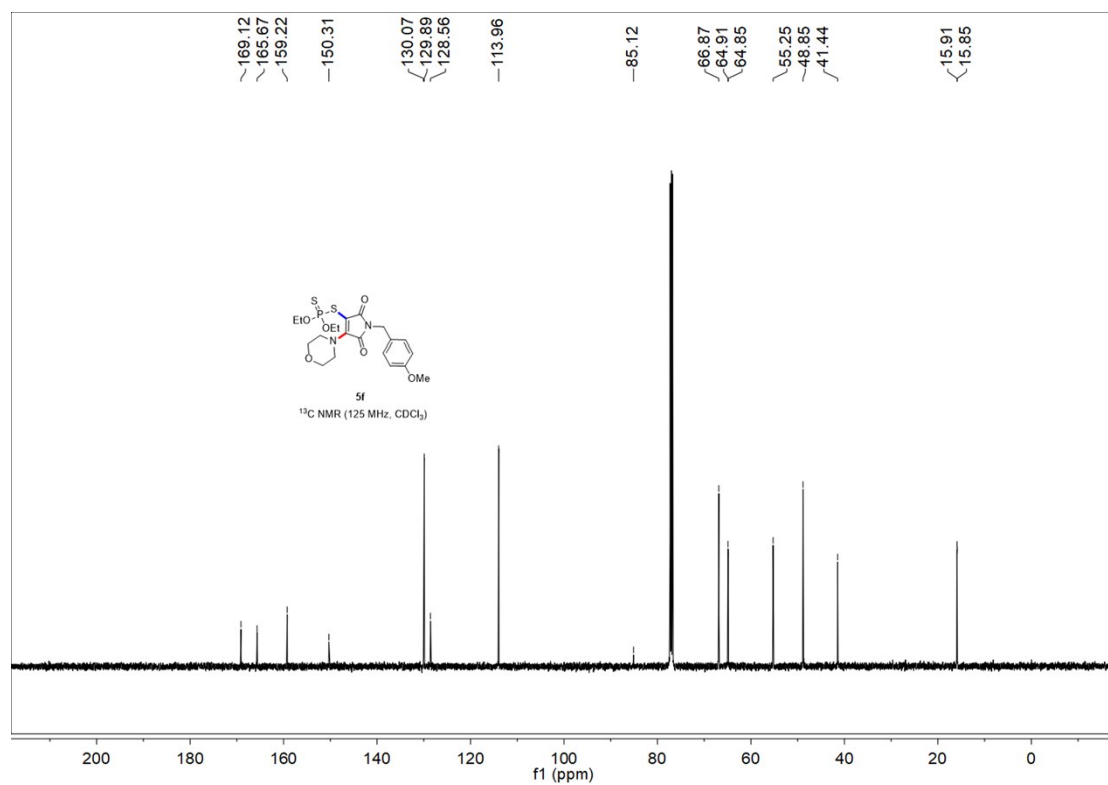

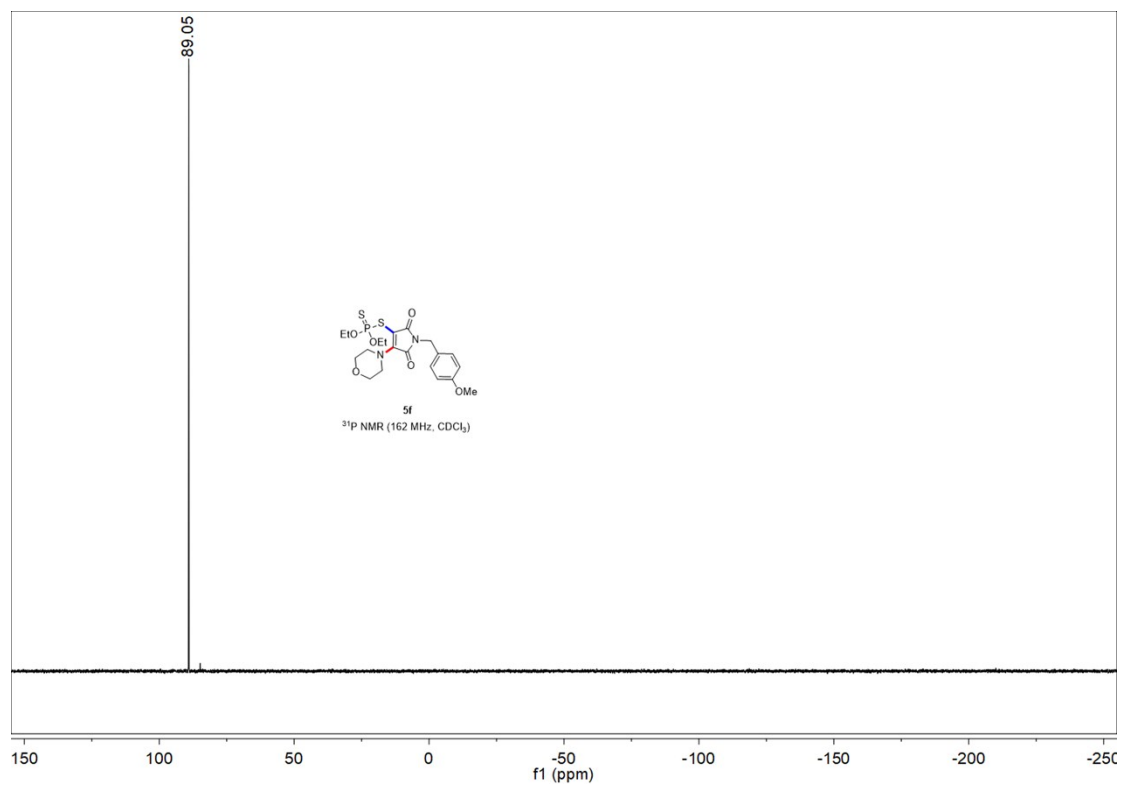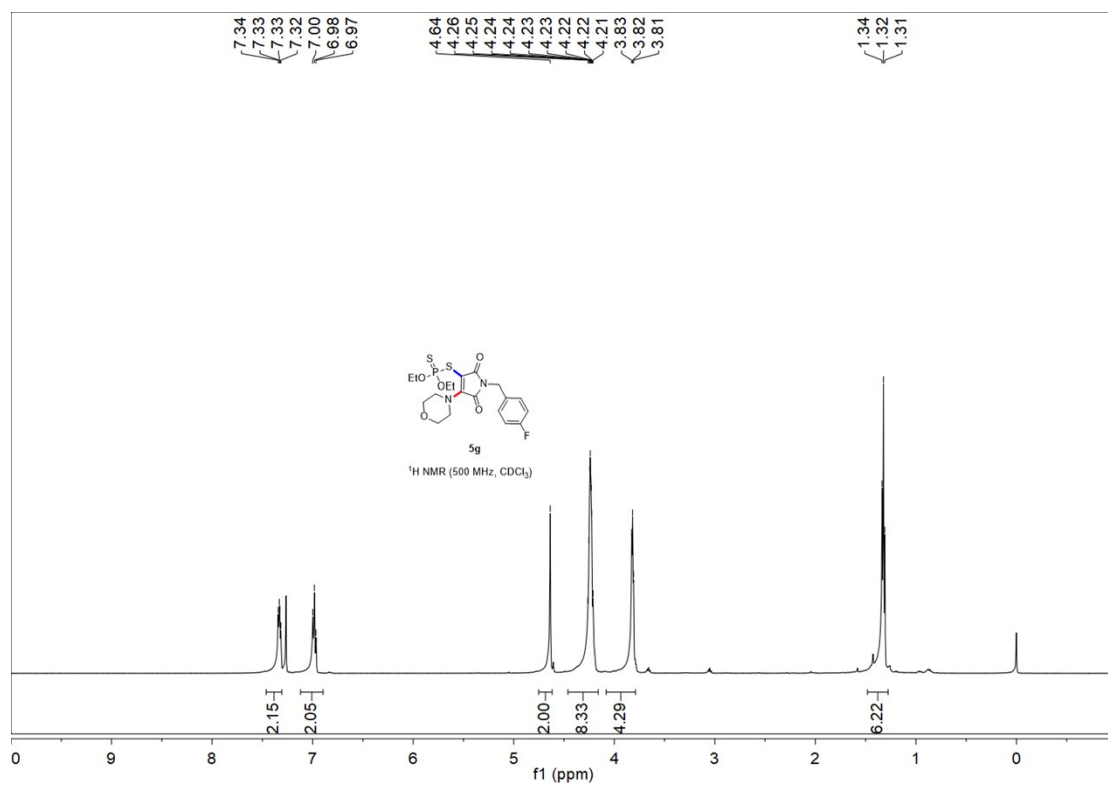

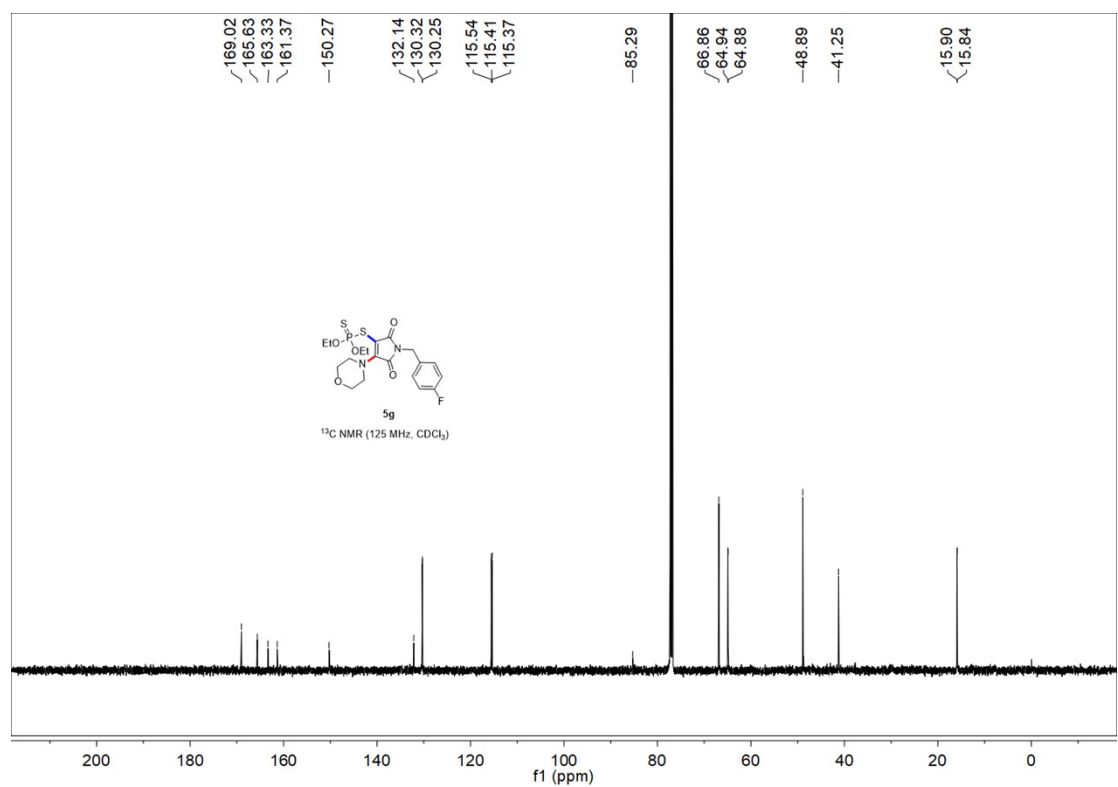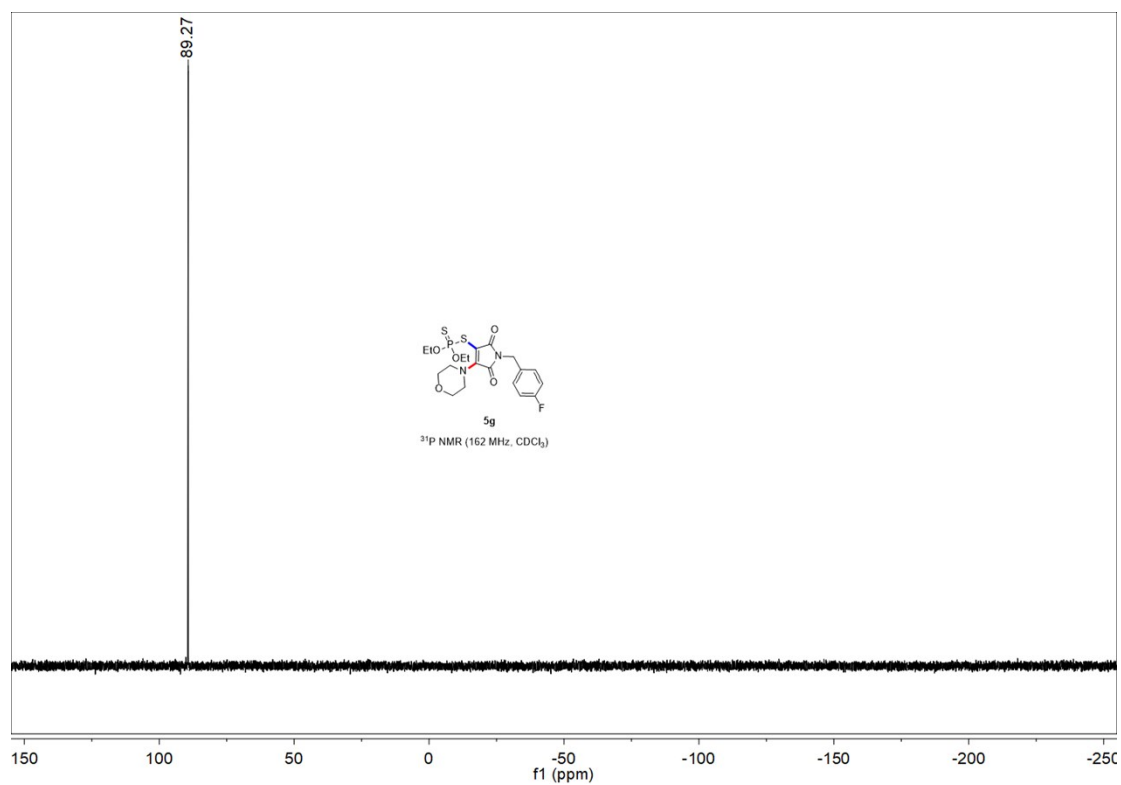



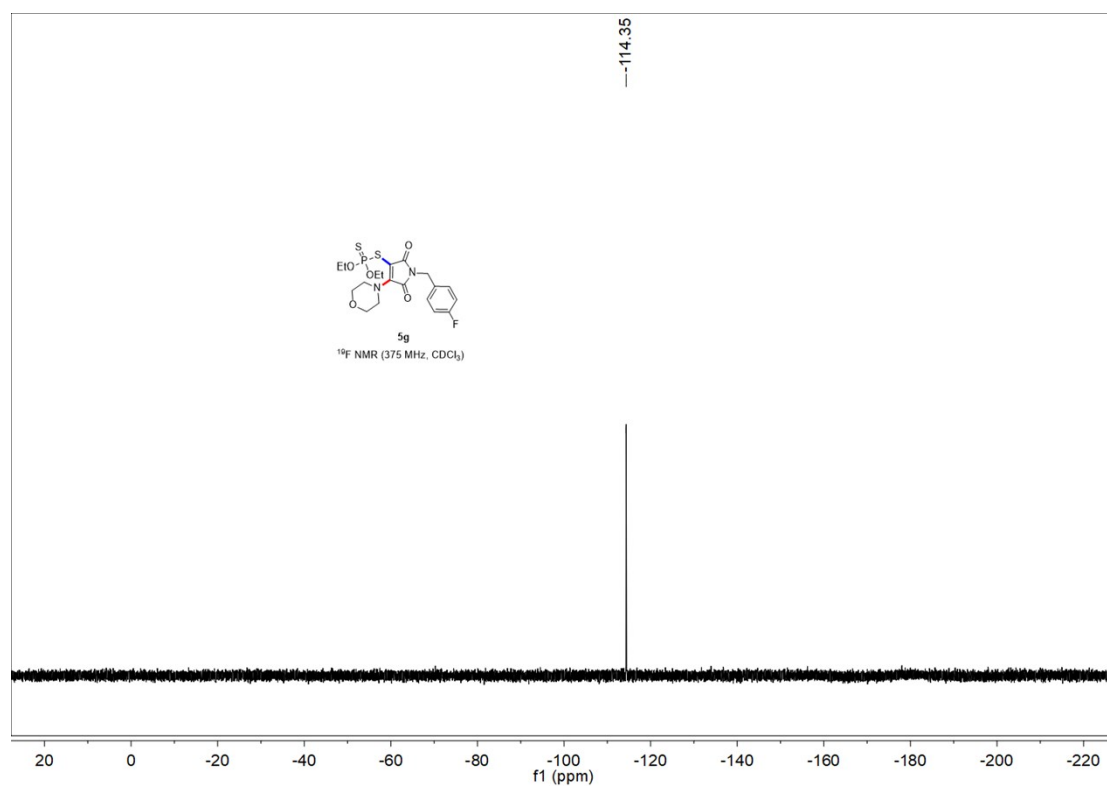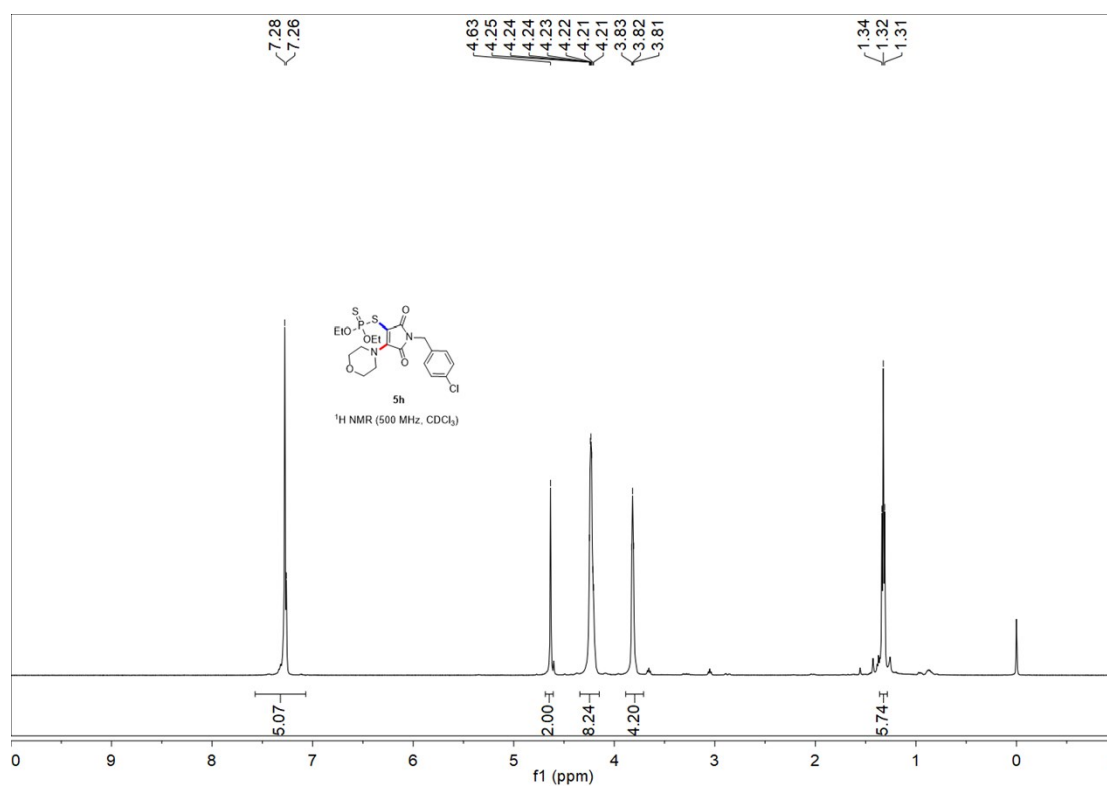

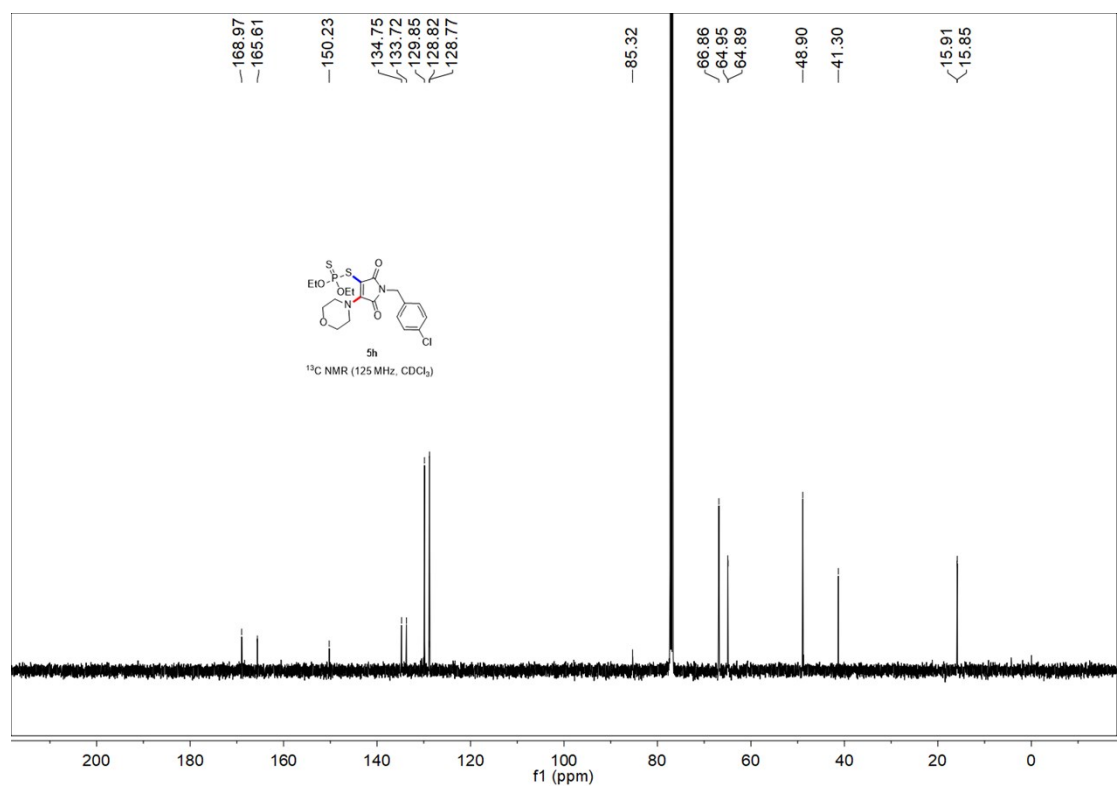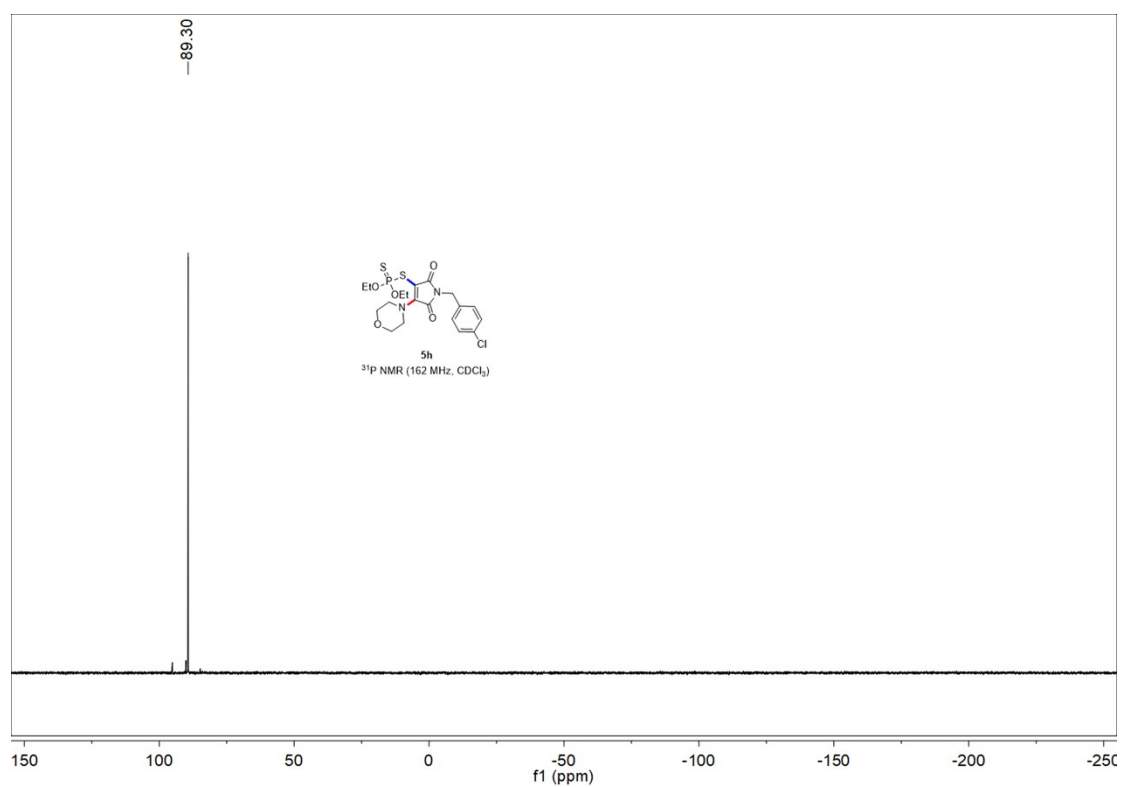

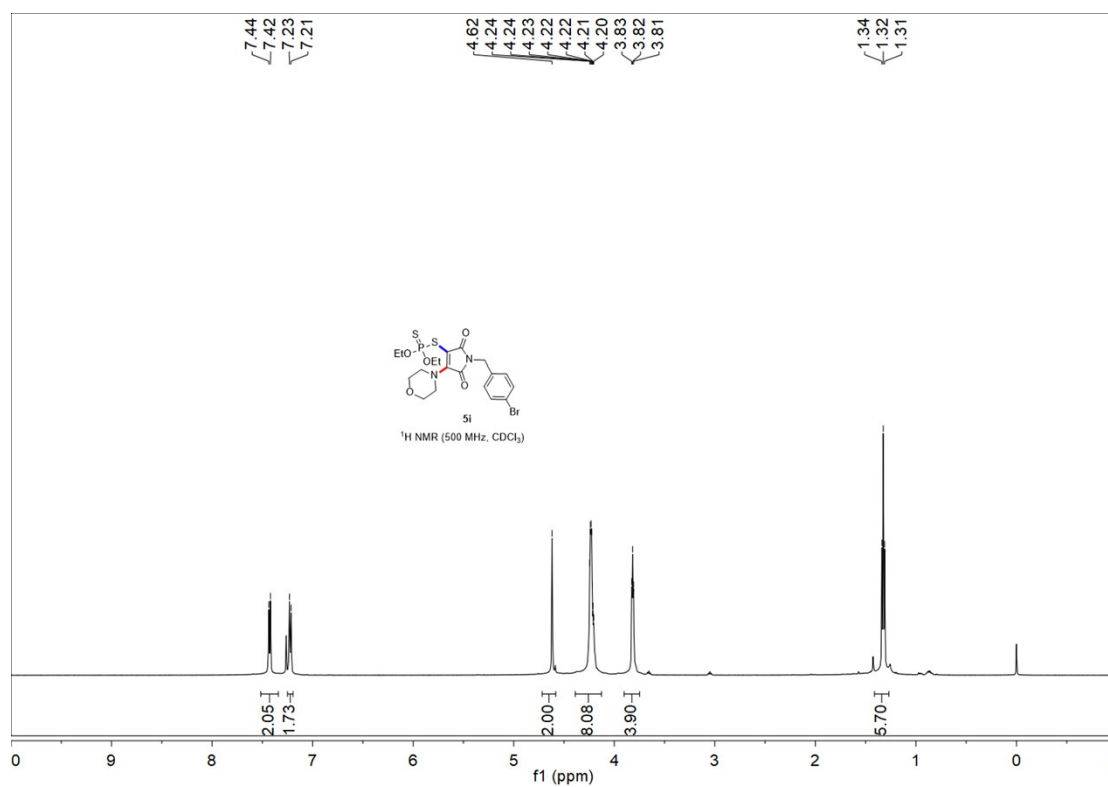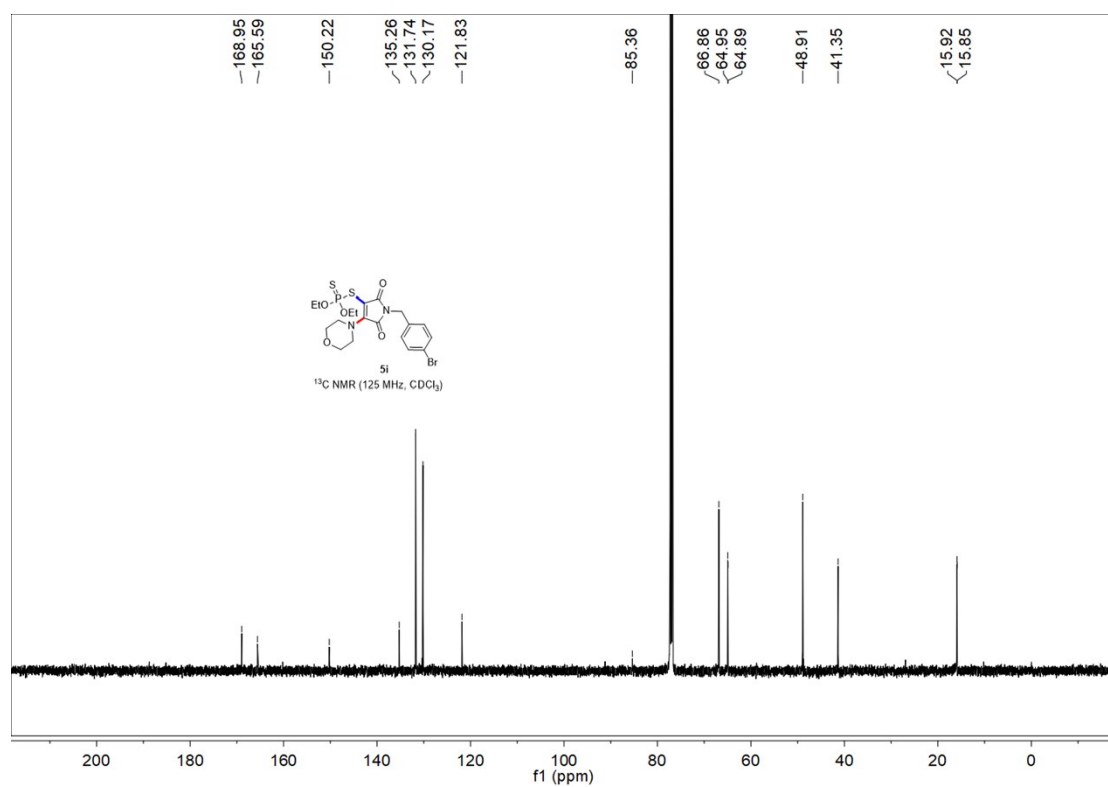

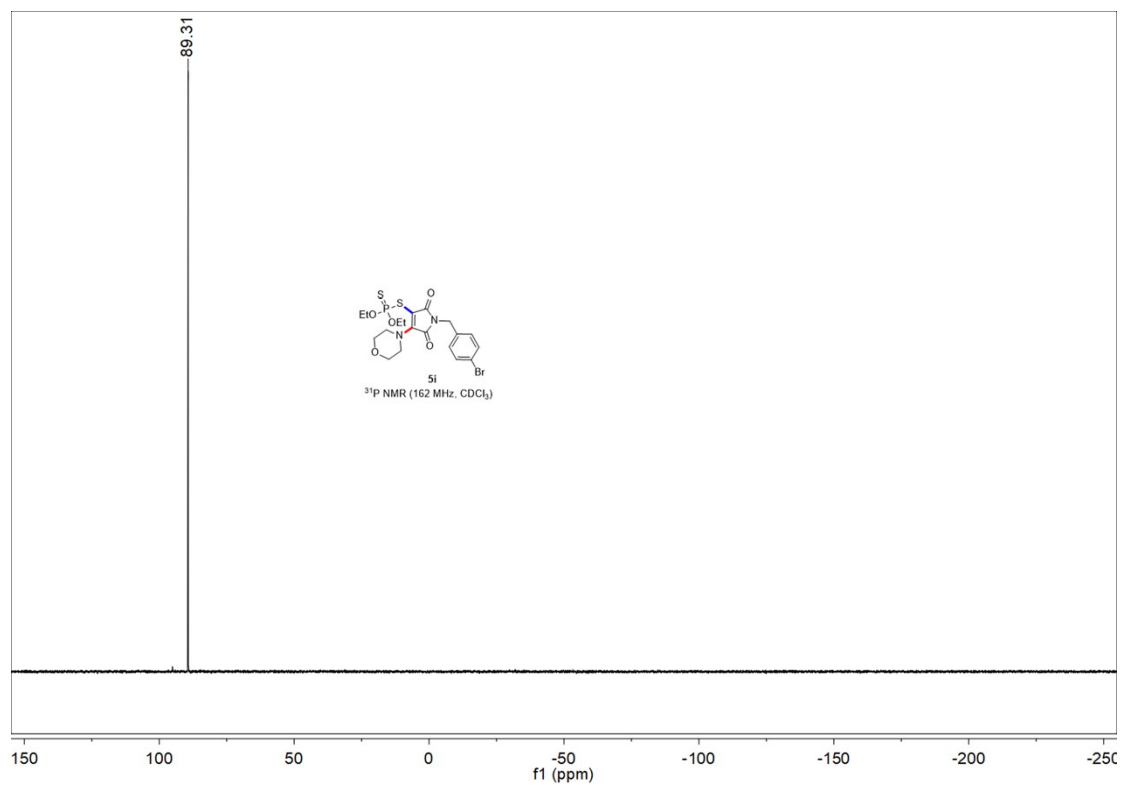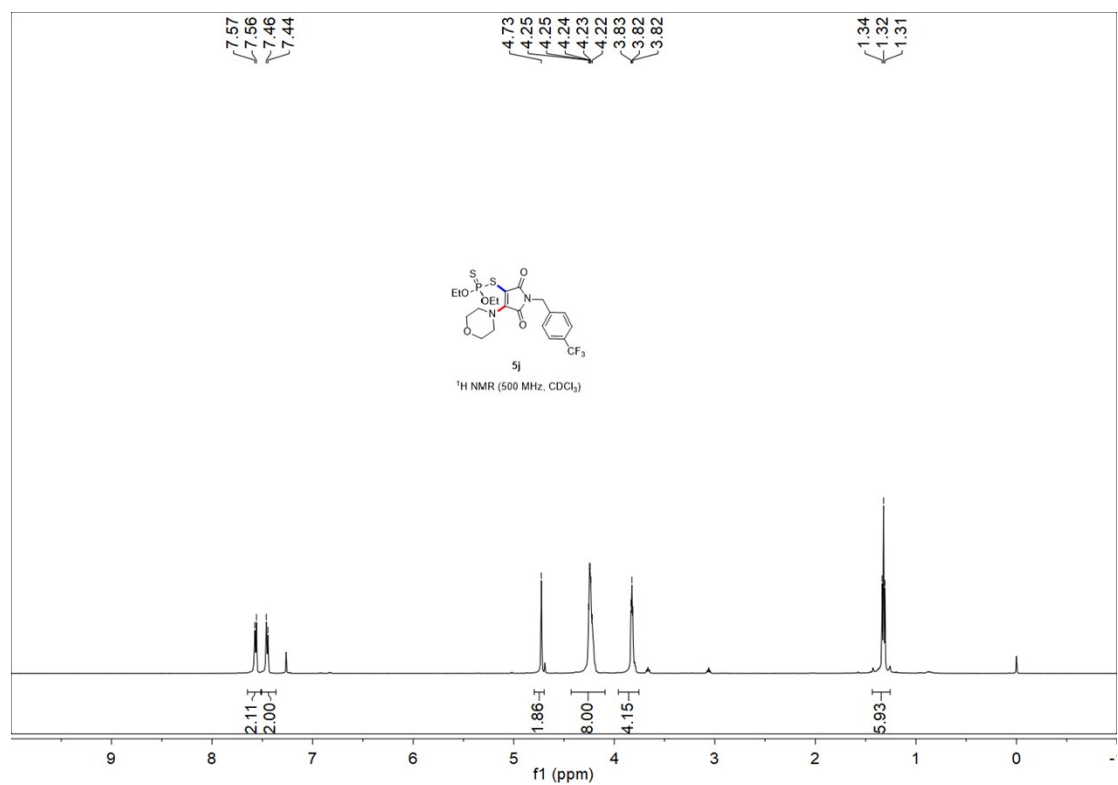

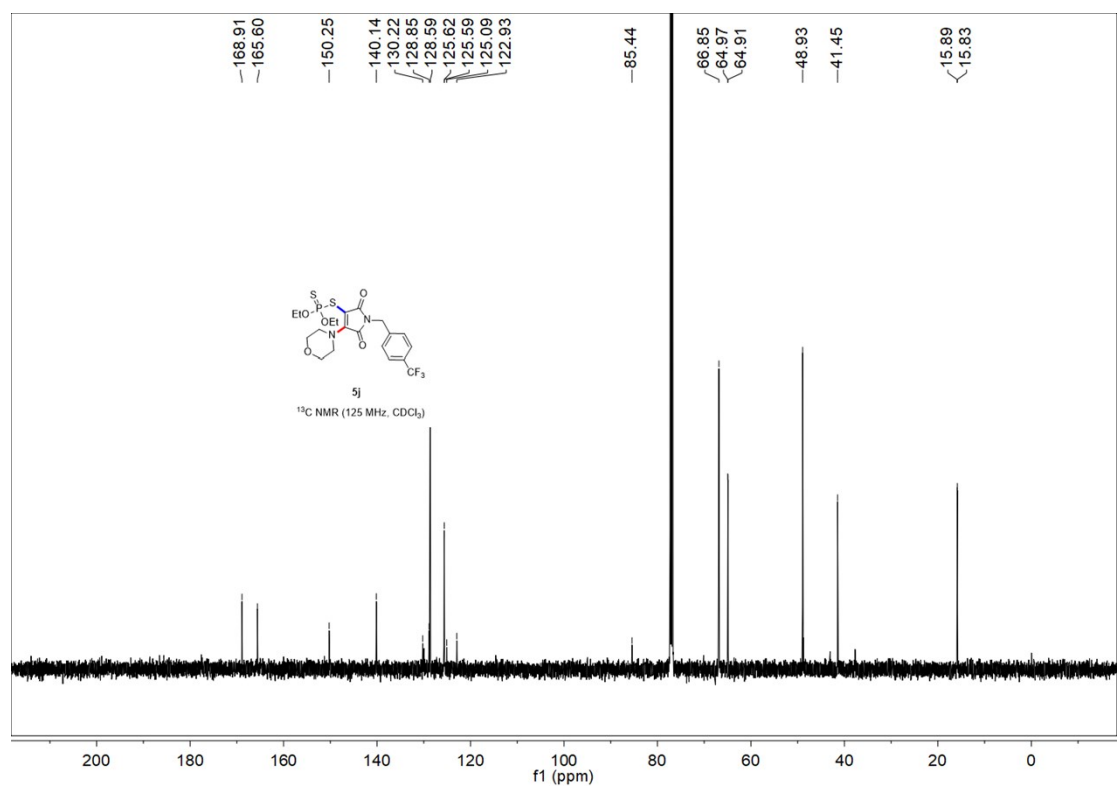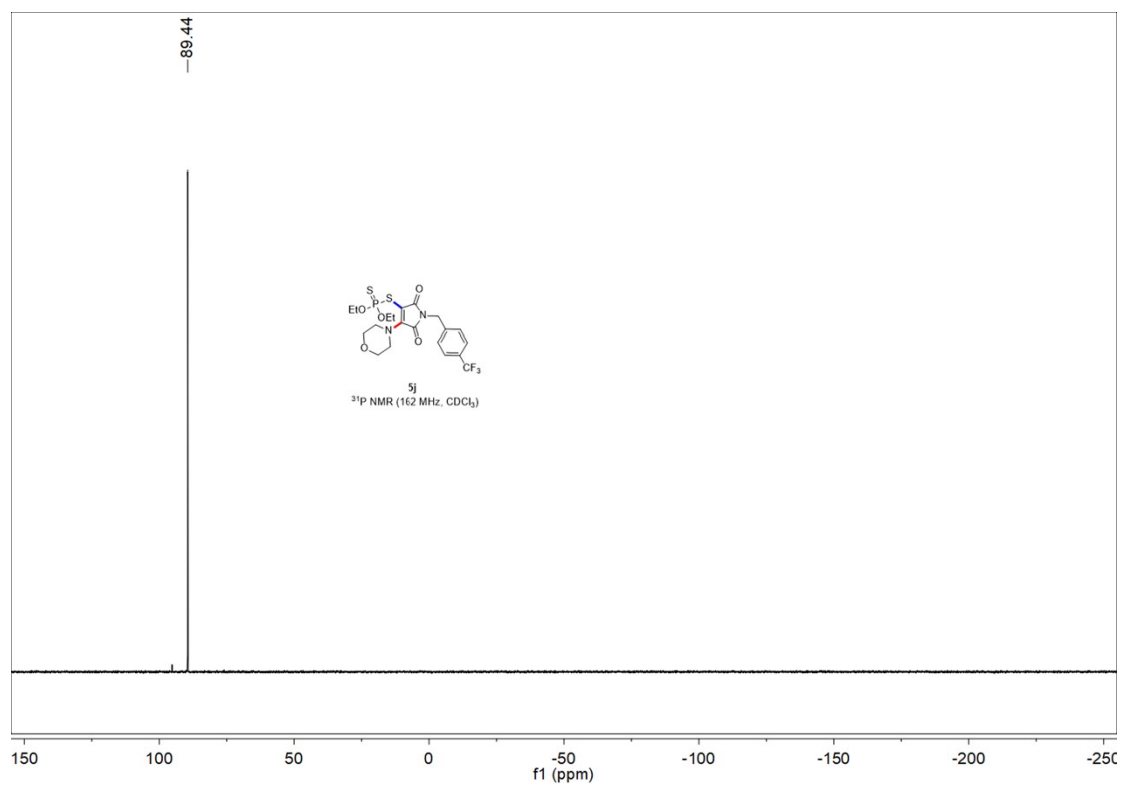

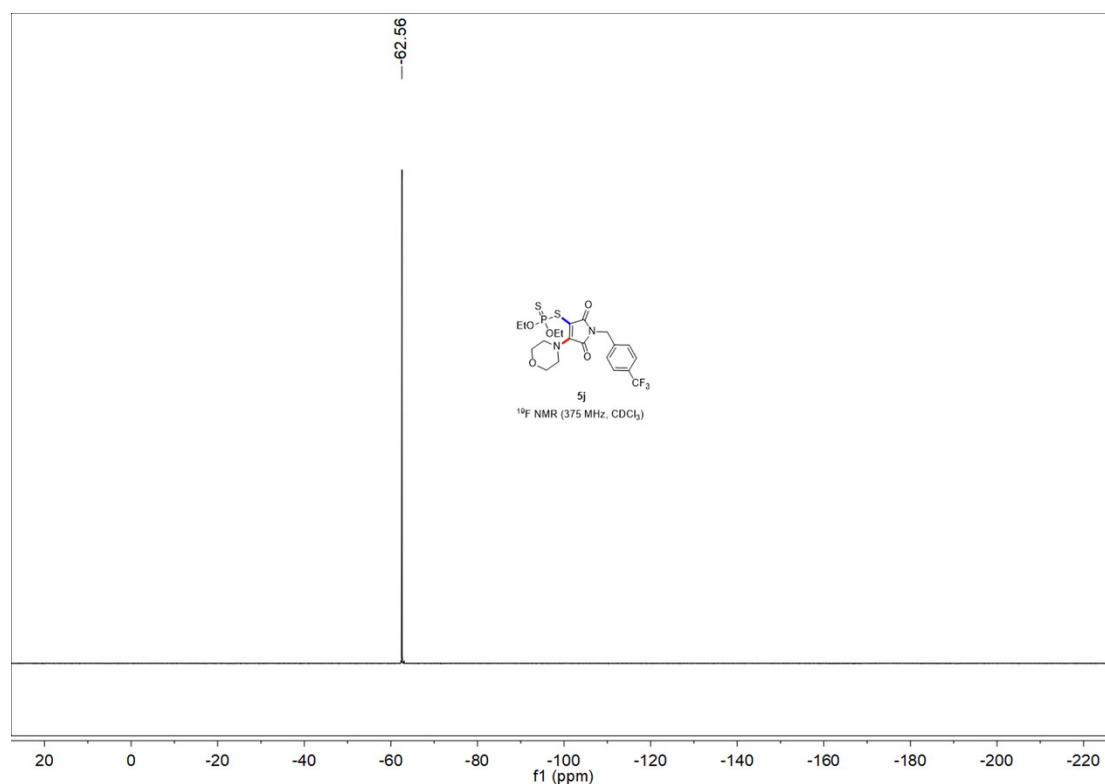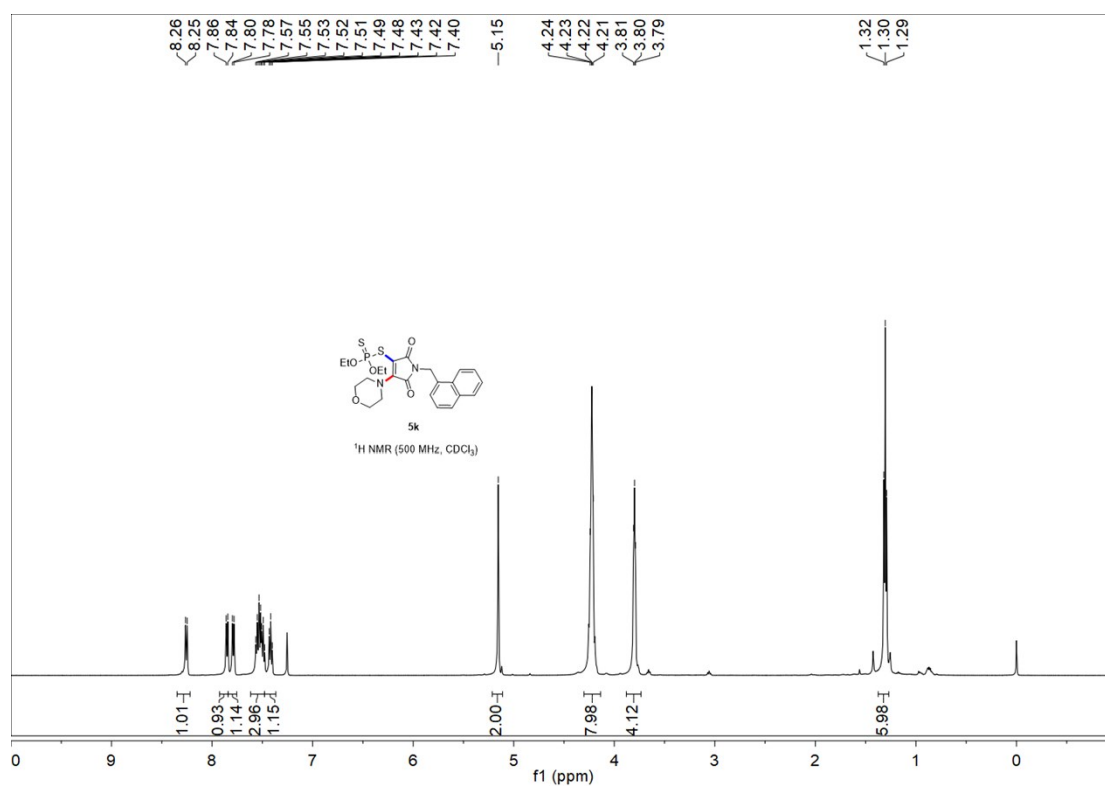

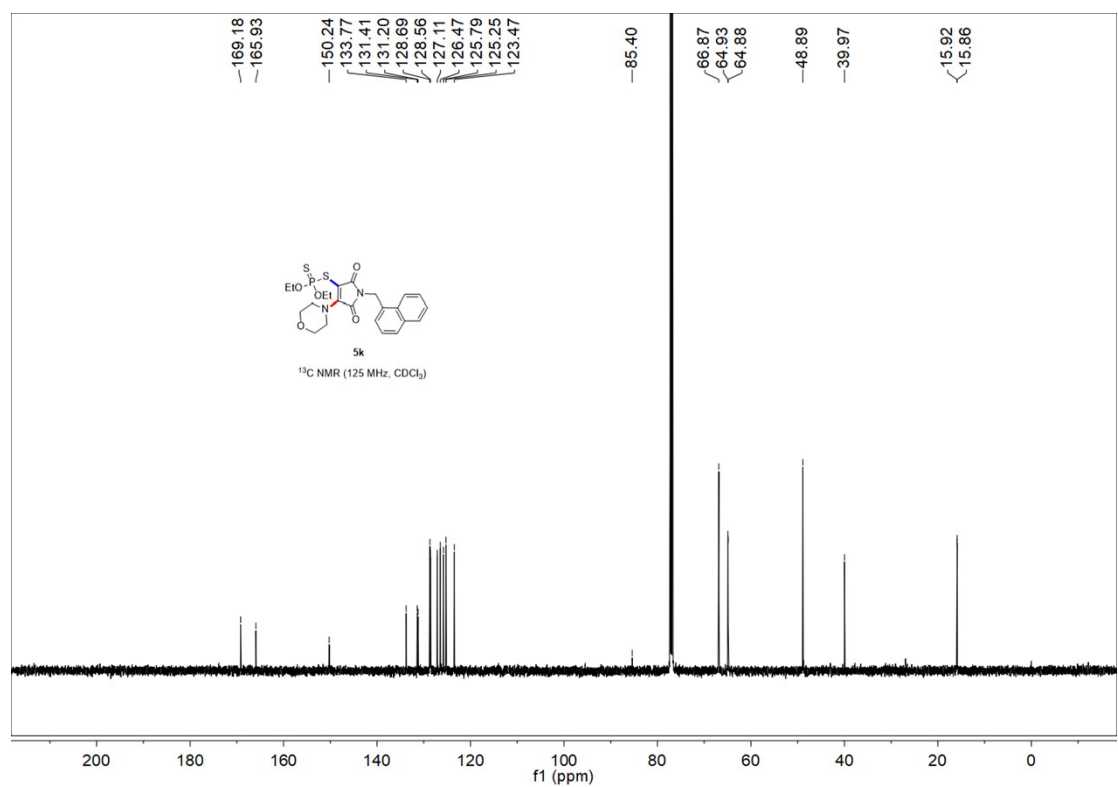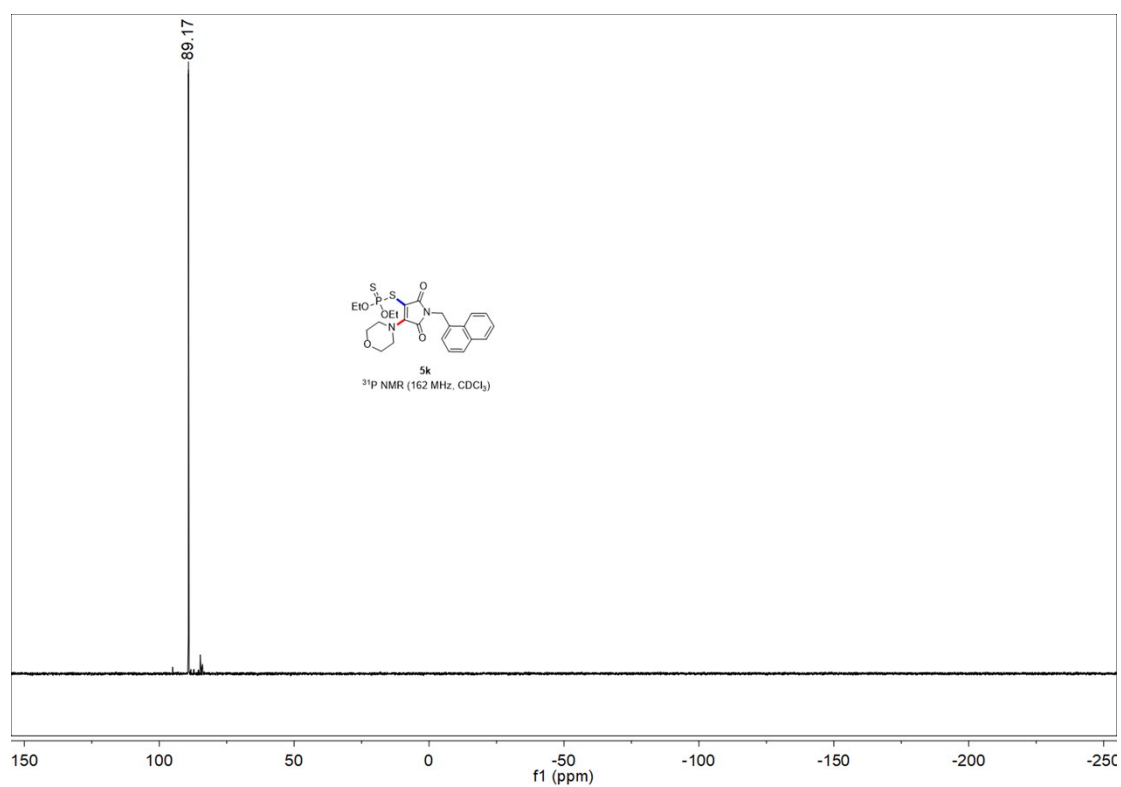

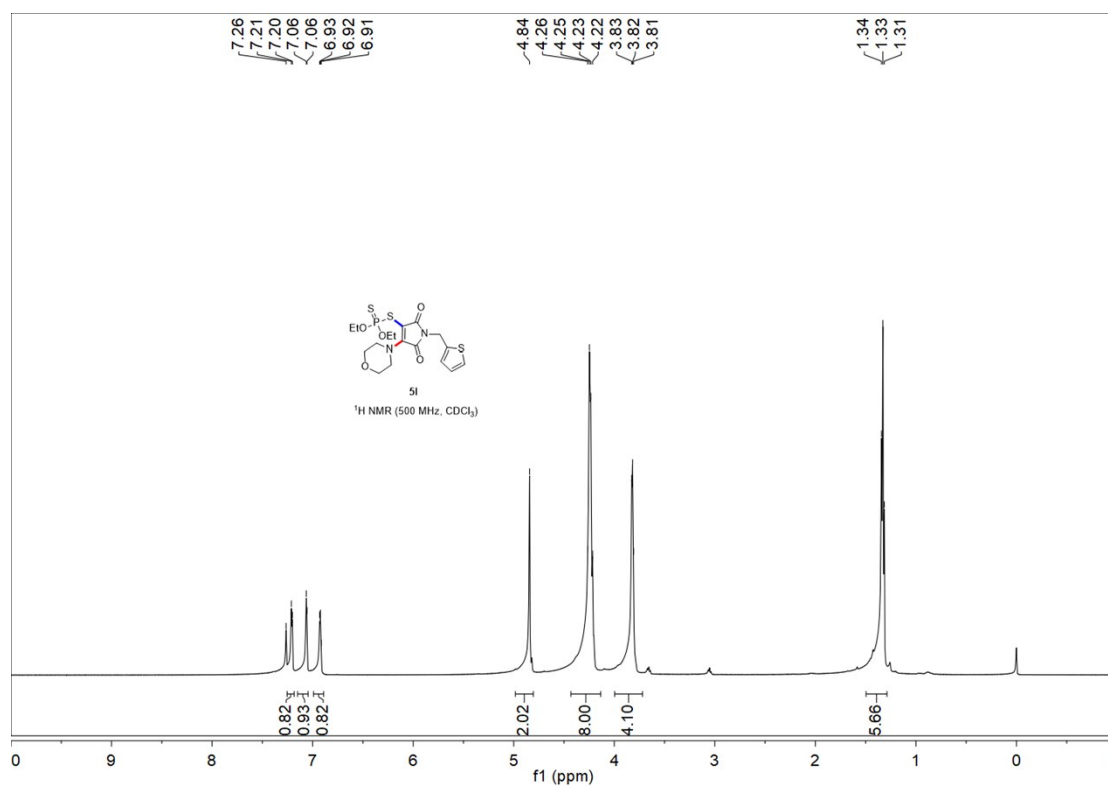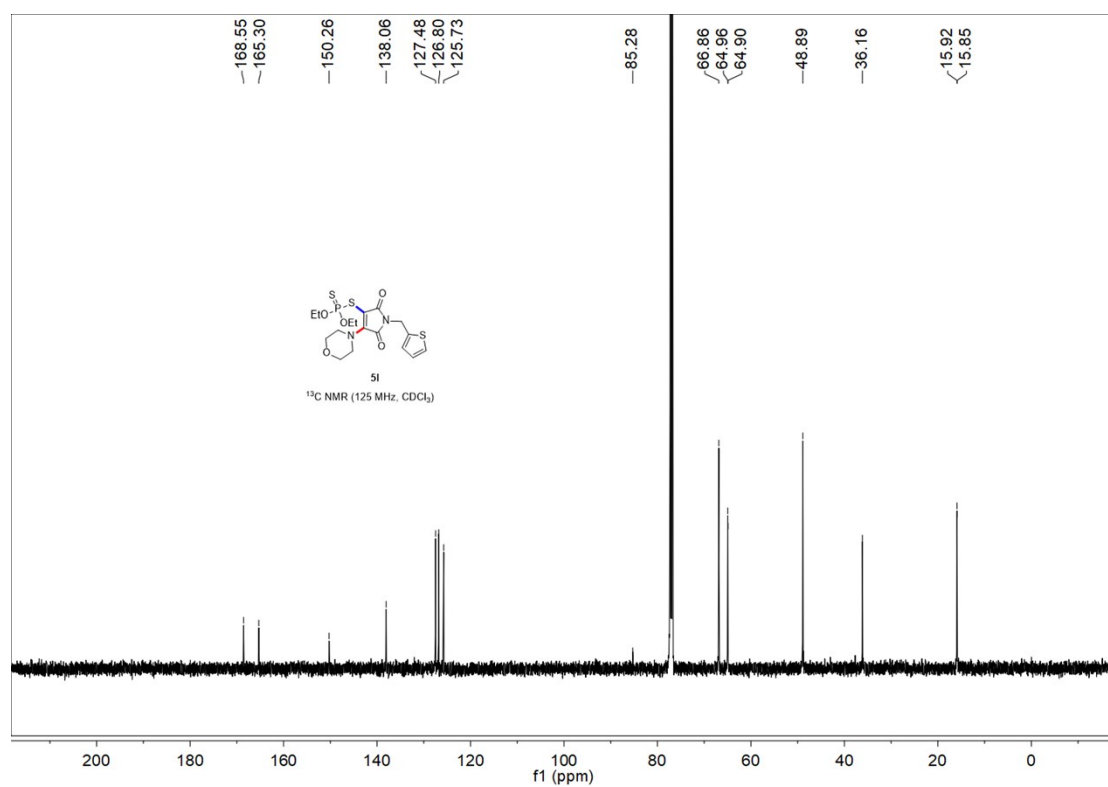



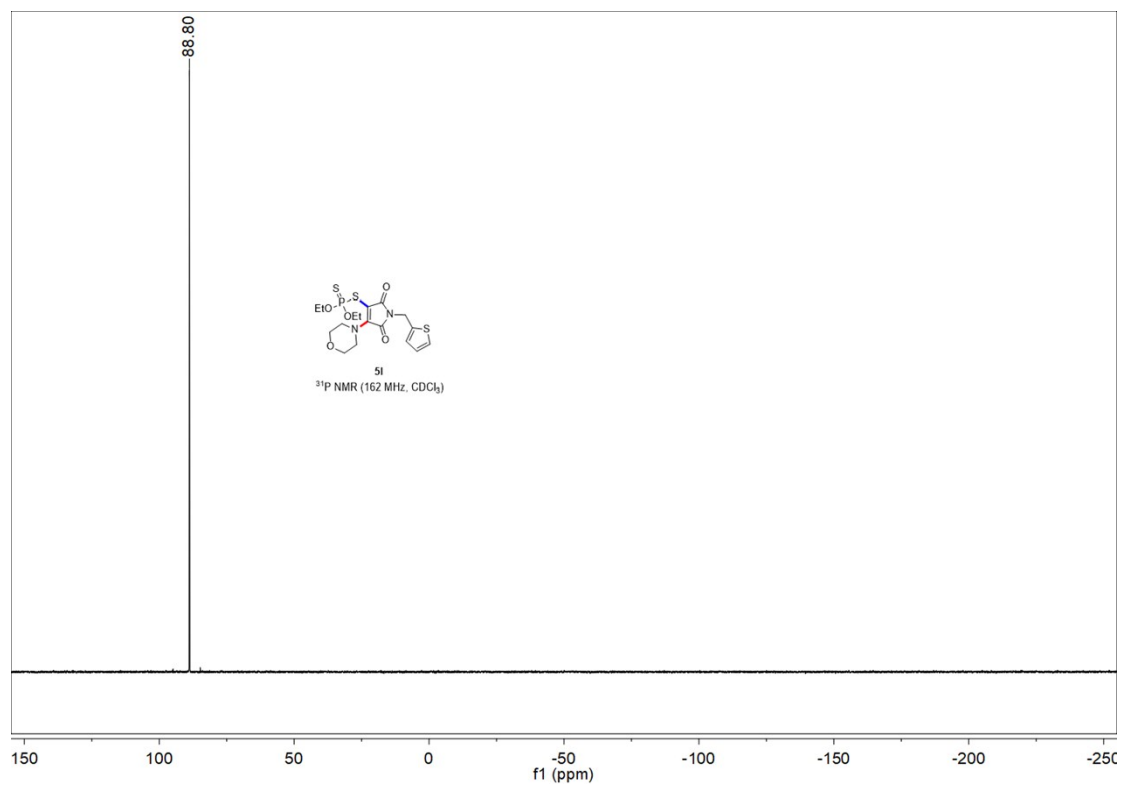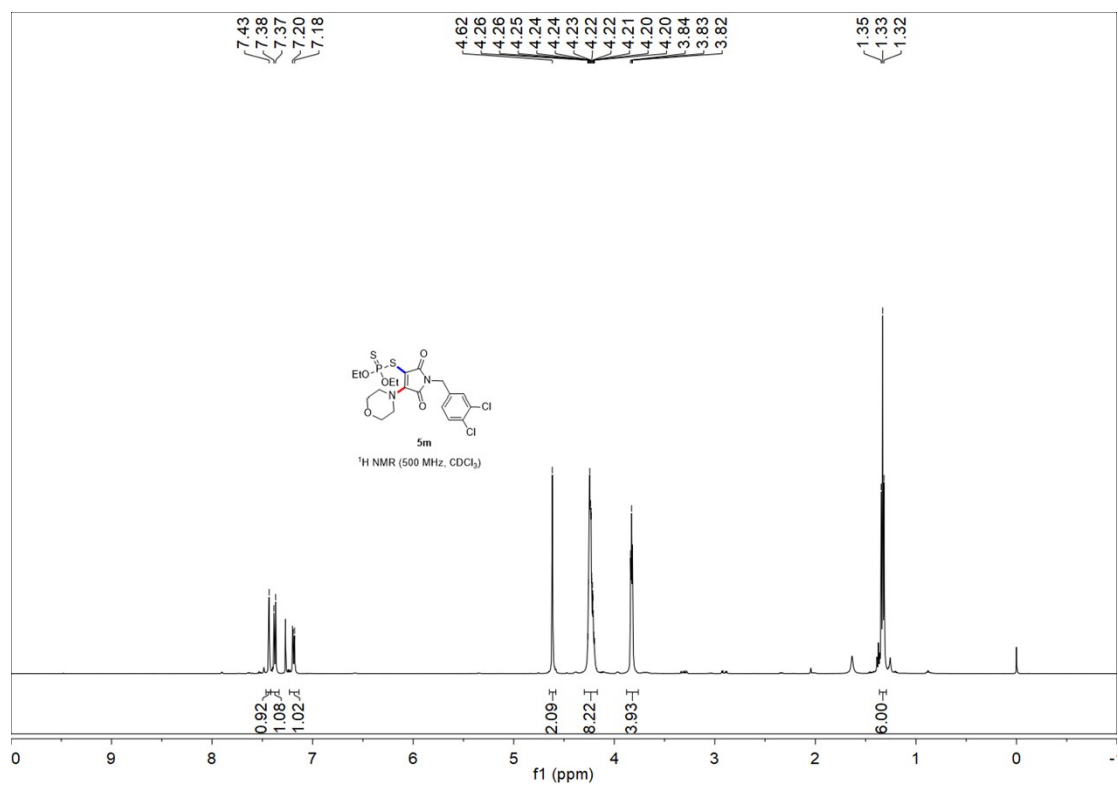

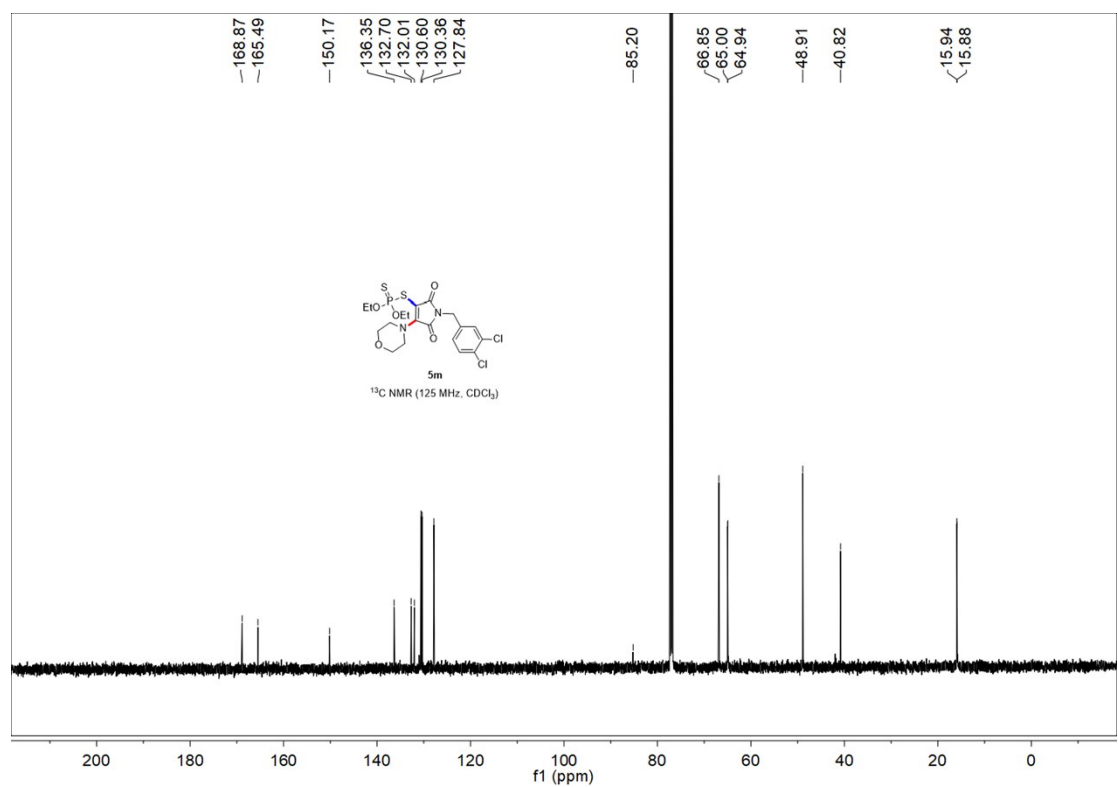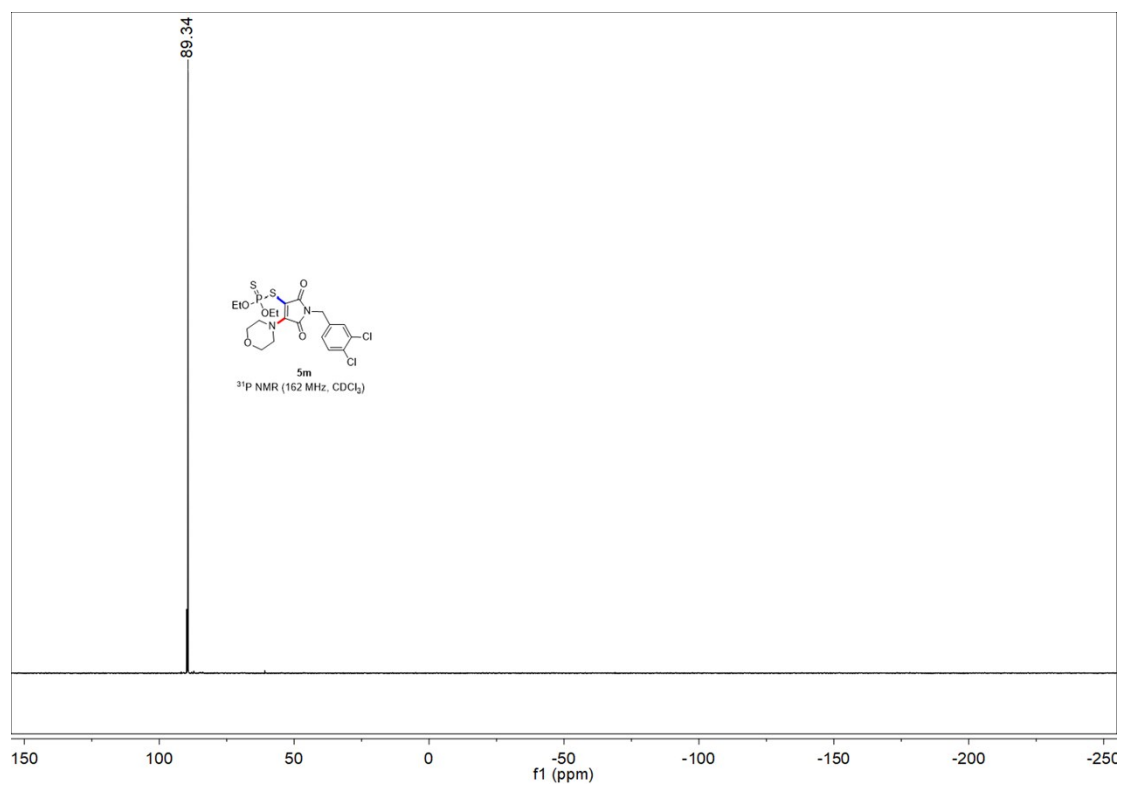

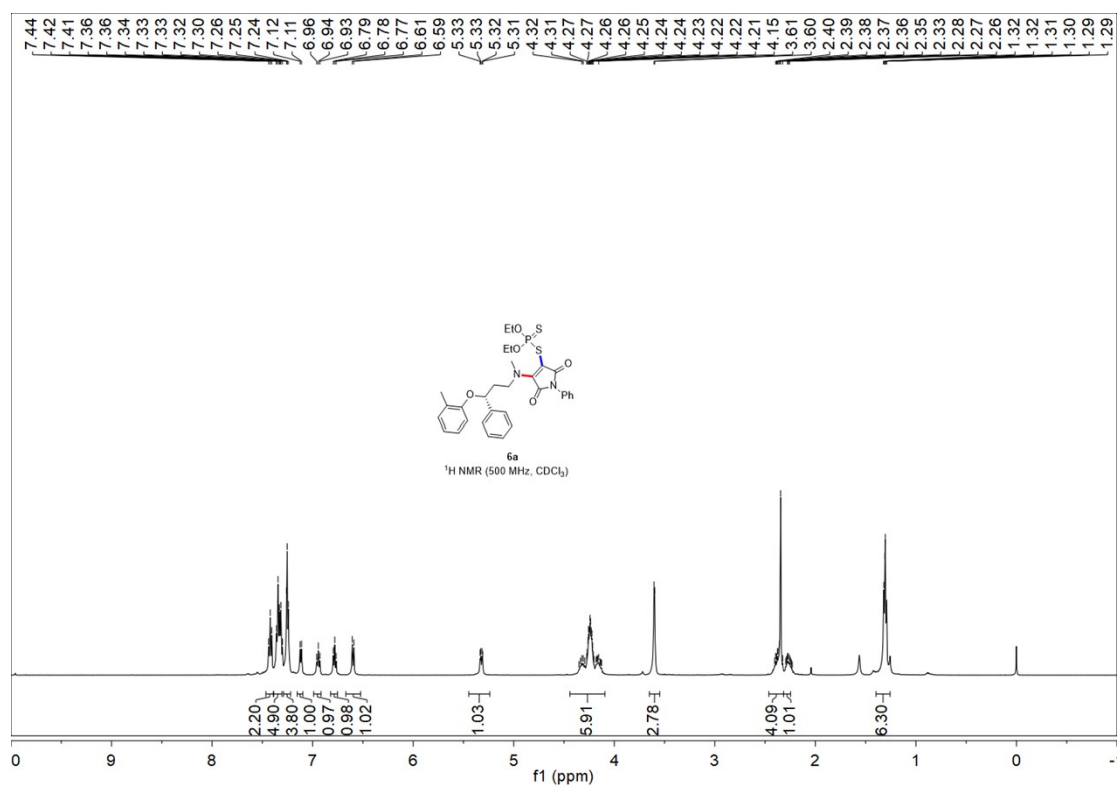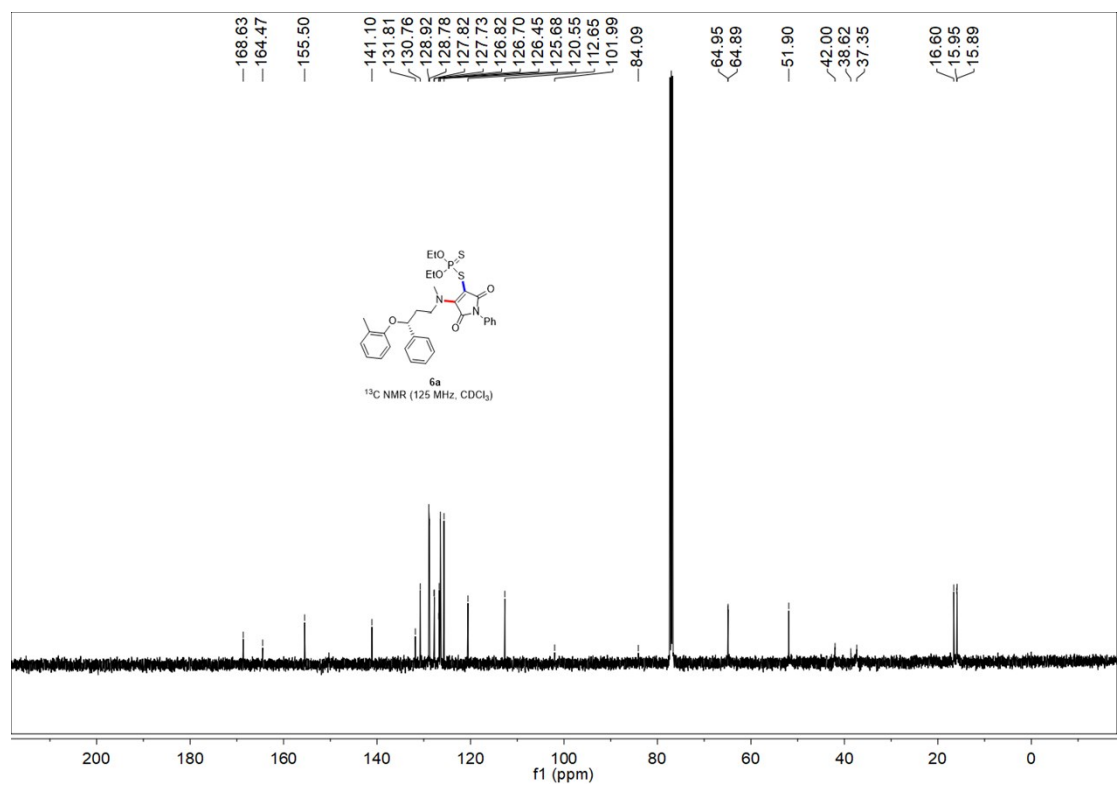

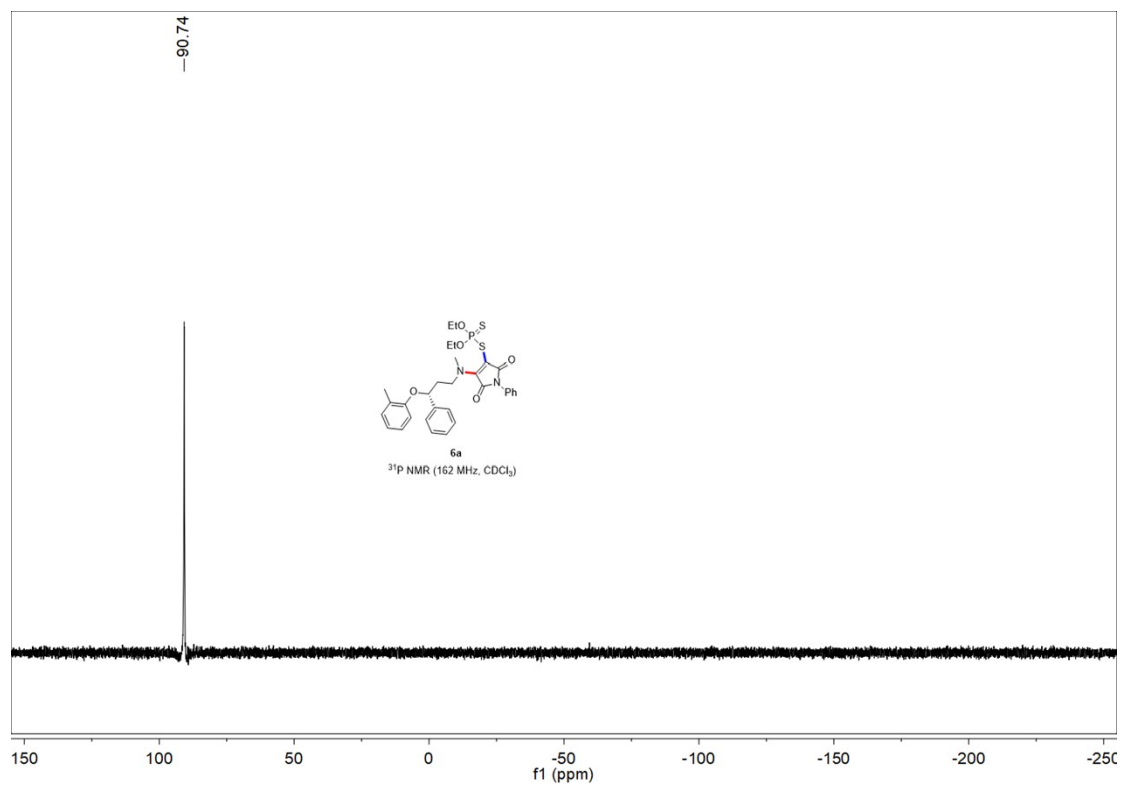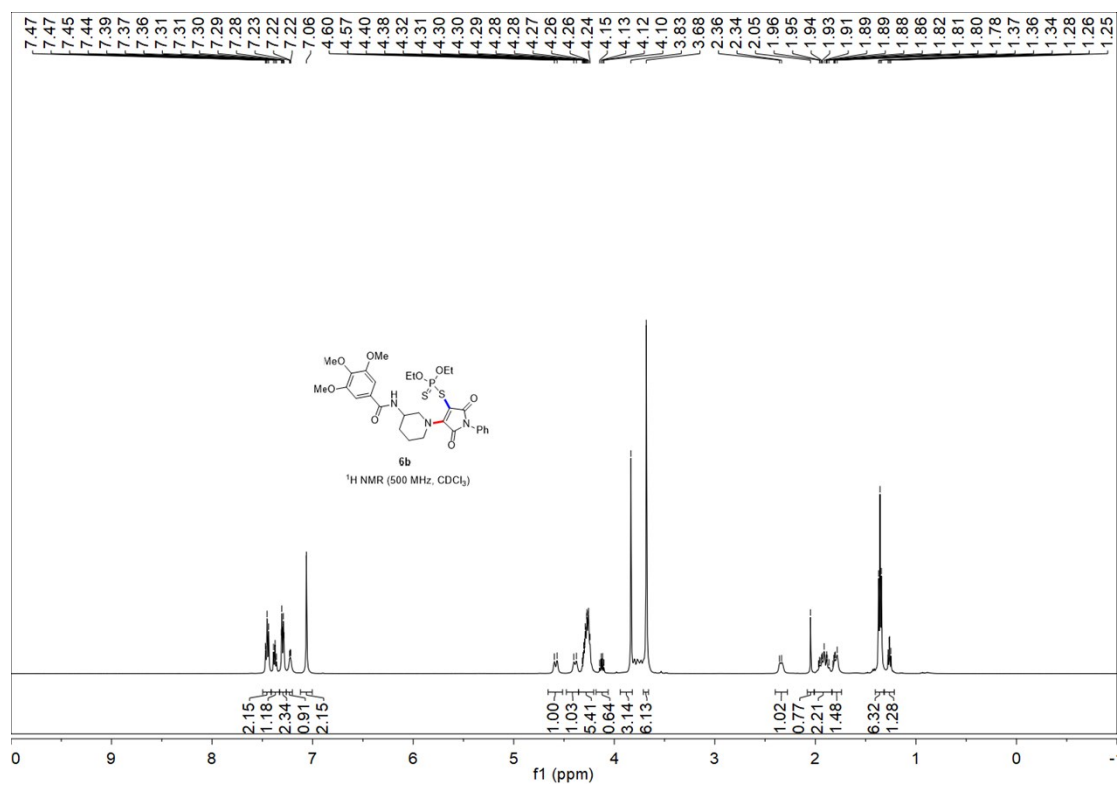

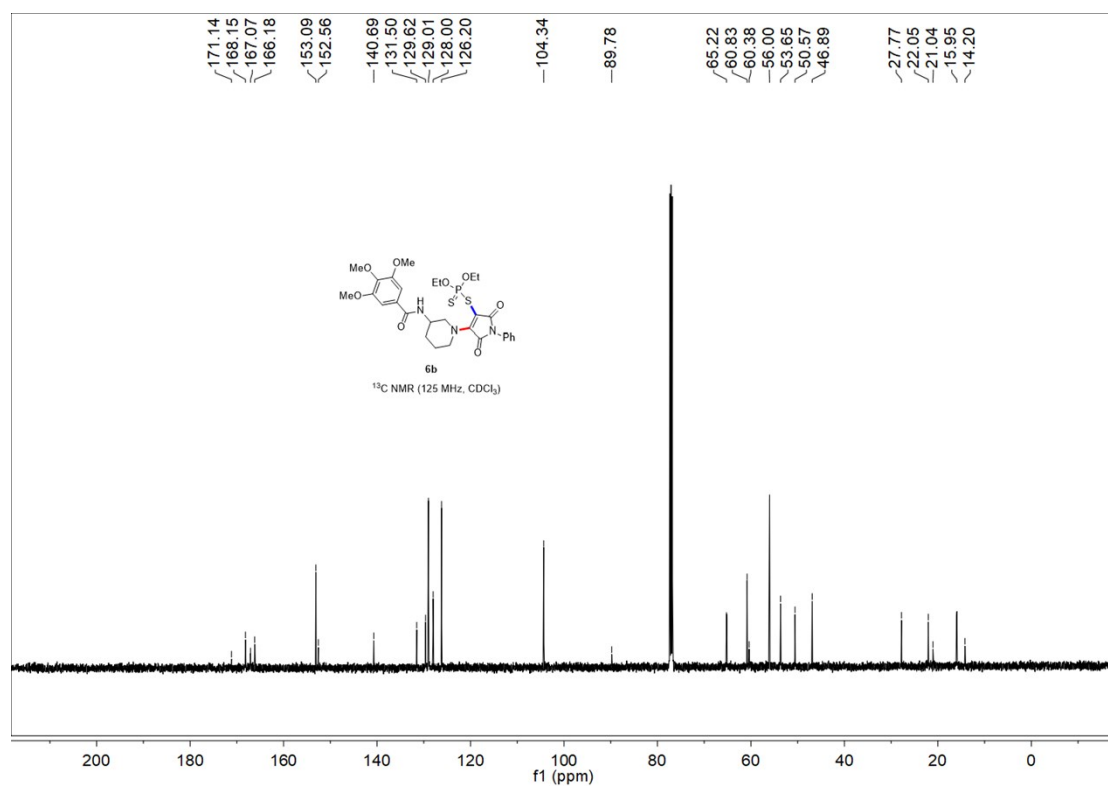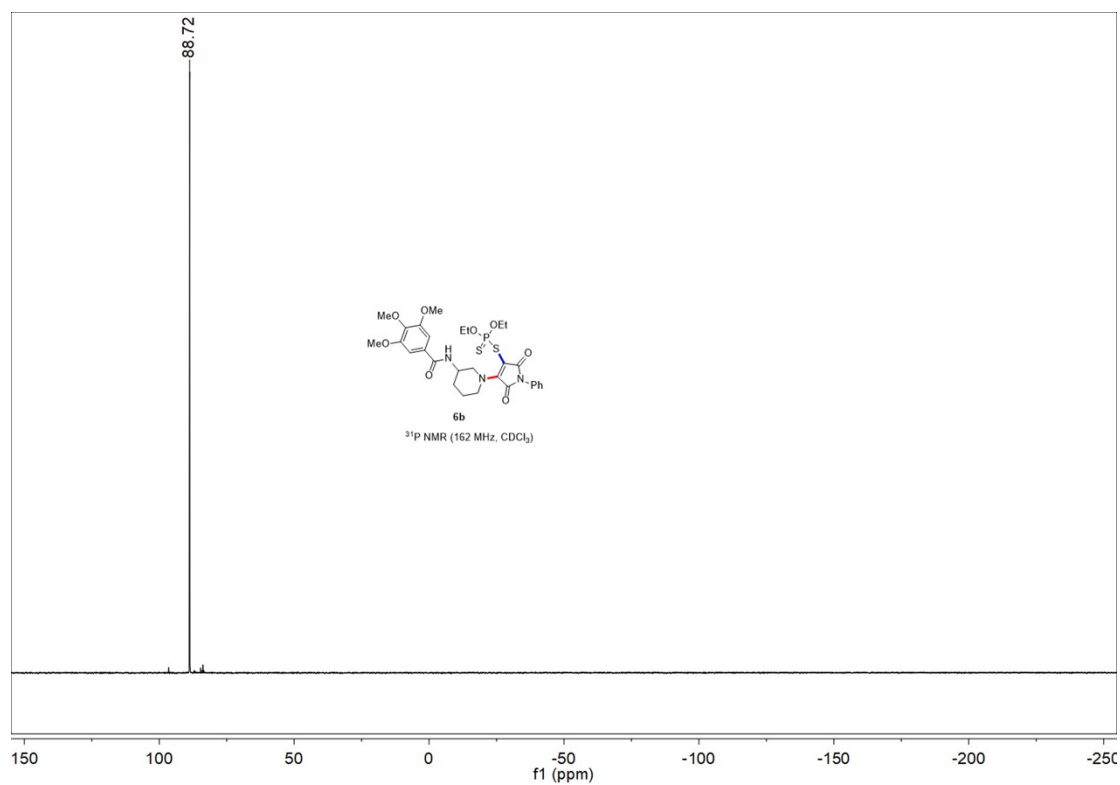

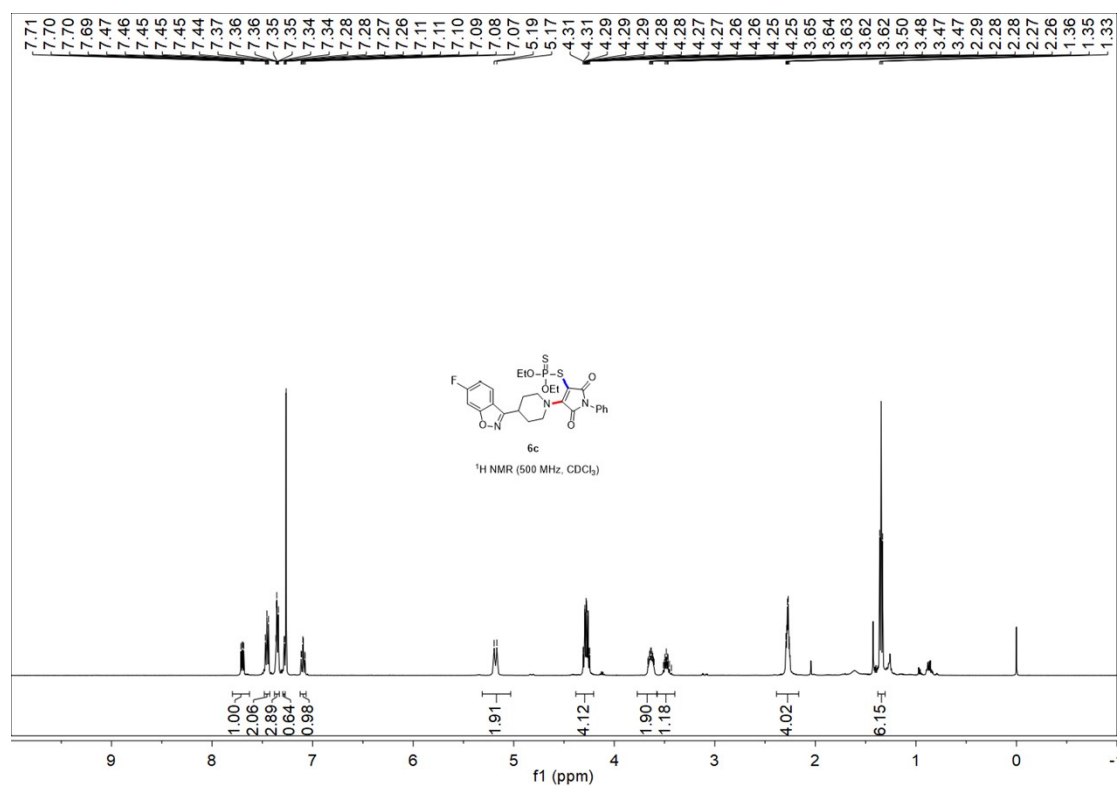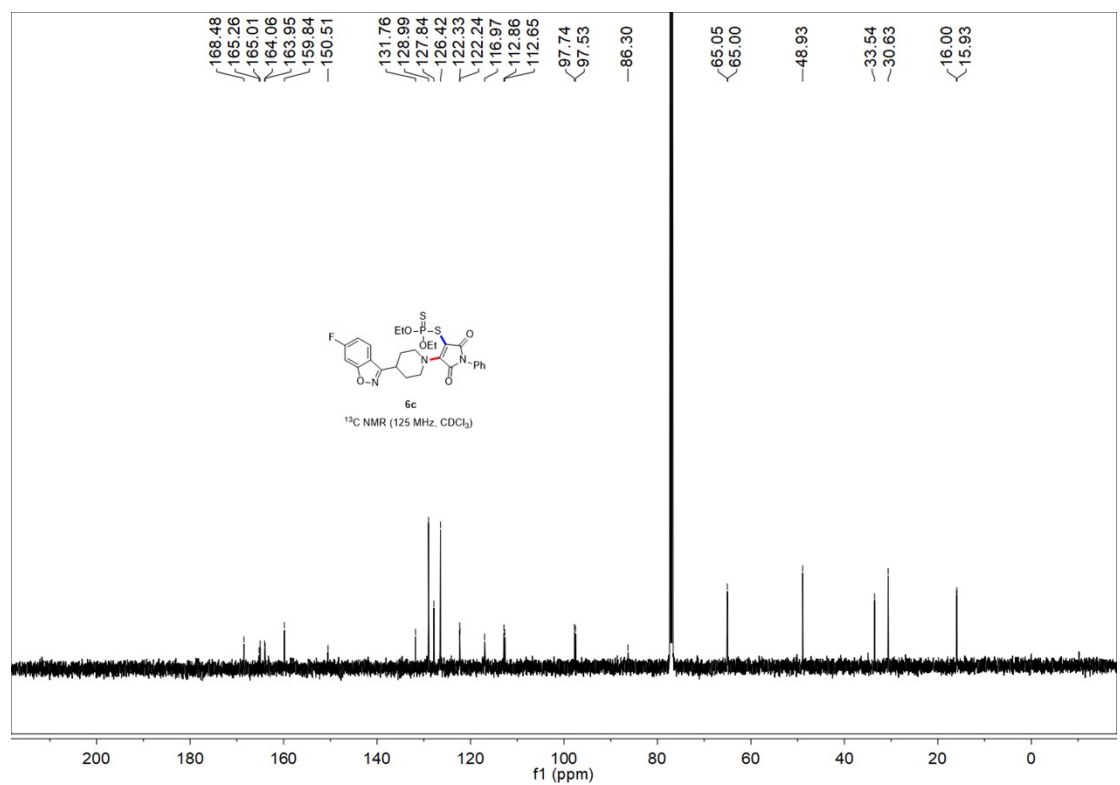

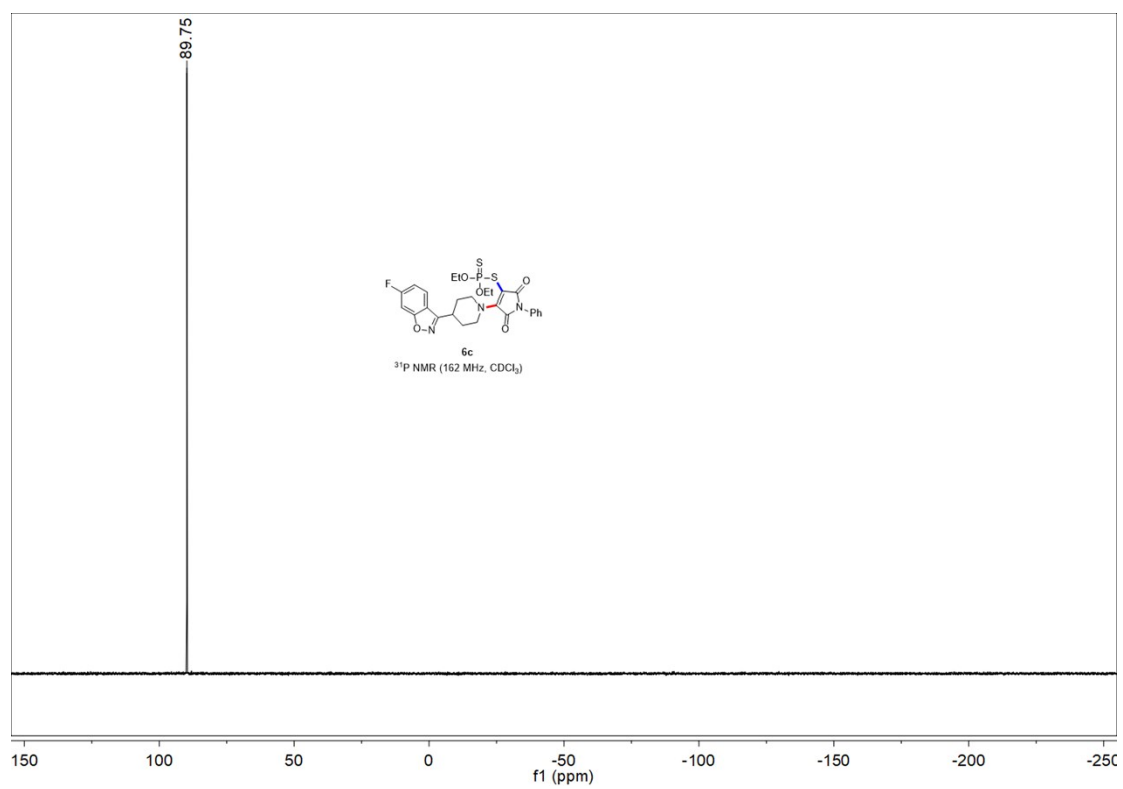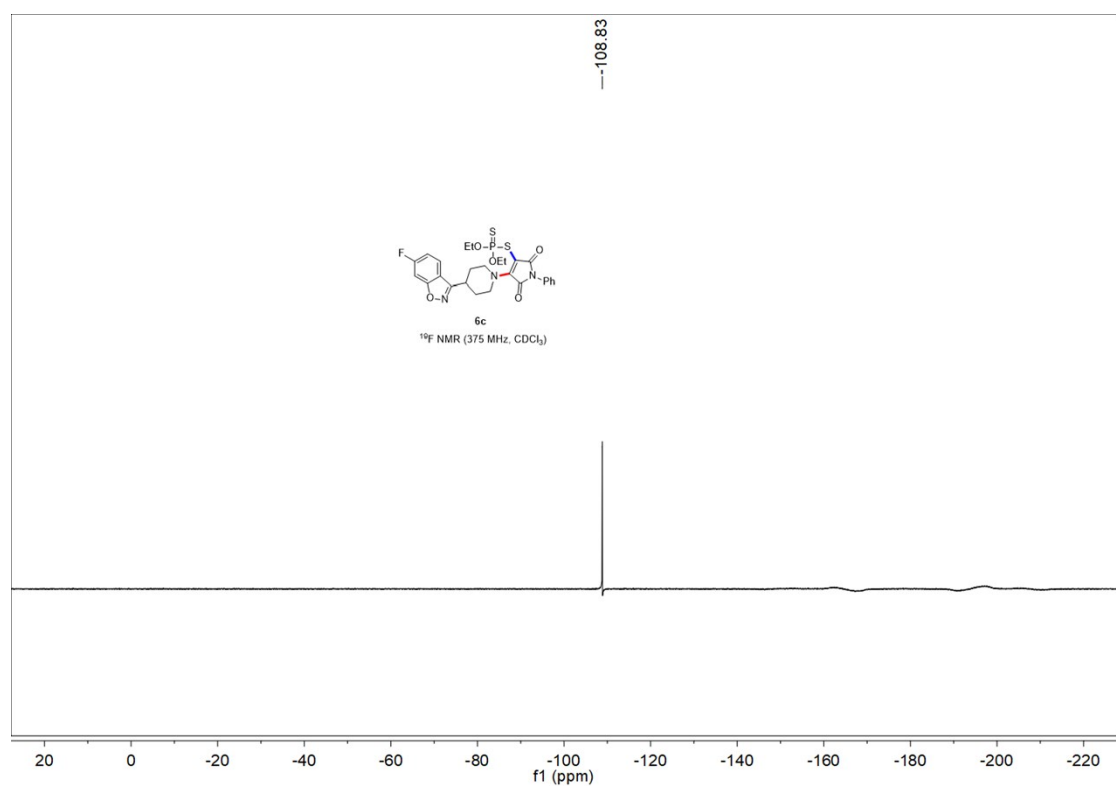

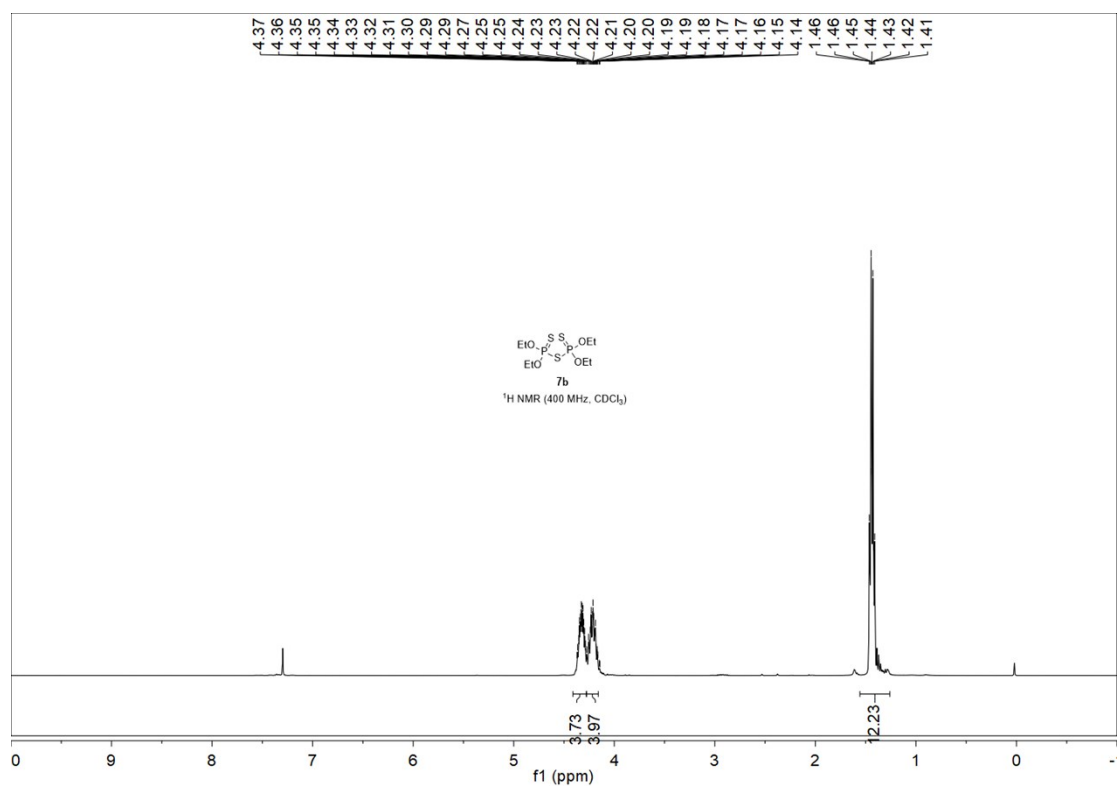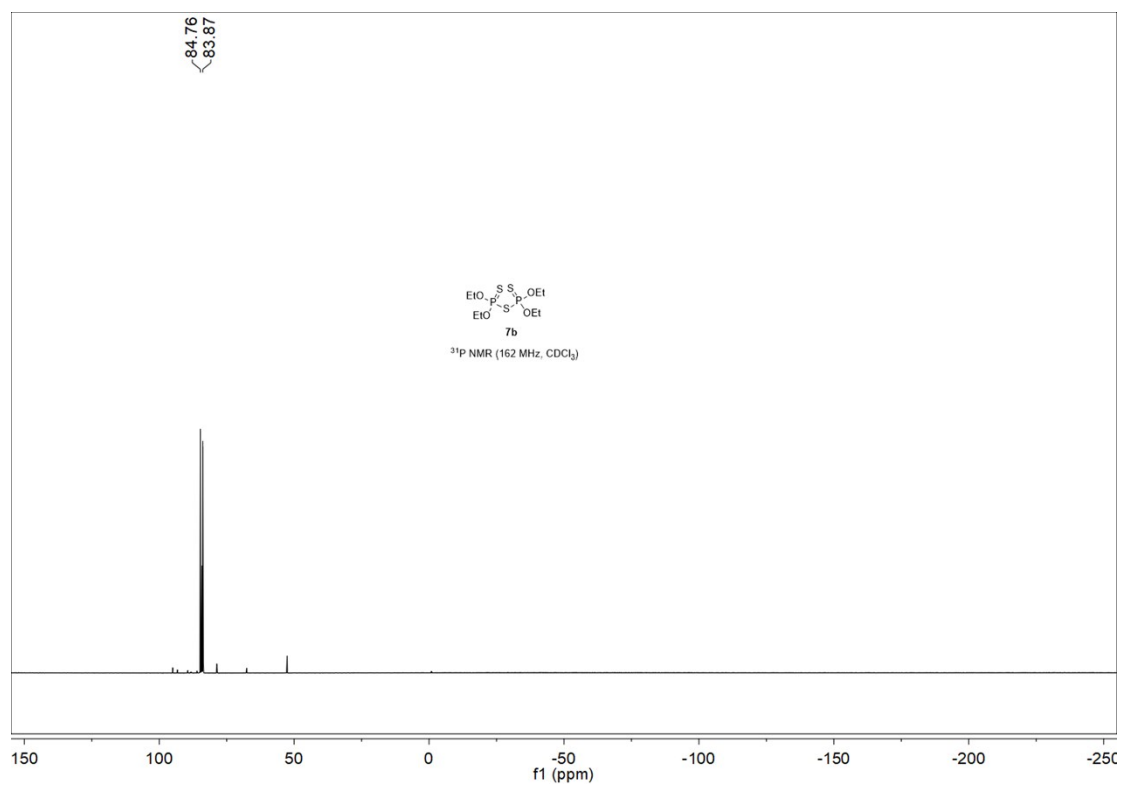

Supplement: d1qo00346a1.pdf [file d1qo00346a1.pdf]
